# Supplementary material for: From desert margins to global insights: floristic diversity and conservation strategies in the arid regions of Tabuk and Khulais, Saudi Arabia – a bibliometric and ecological synthesis
Source: Frontiers journal article supplement (doi:10.3389/ffgc.2025.1669742), 2025-10-20
Supplement: Table_1.xlsx [file Table_1.xlsx]

## Sheet: Scopus_78_27
Authors	Author full names	Author(s) ID	Title	Year	Source title	Volume	Issue	Art. No.	Page start	Page end	Page count	Cited by	DOI	Link	Affiliations	Authors with affiliations	Abstract	Author Keywords	Index Keywords	Molecular Sequence Numbers	Chemicals/CAS	References	Editors	Publisher	Sponsors	Conference name	Conference date	Conference location	Conference code	ISSN	ISBN	CODEN	PubMed ID	Language of Original Document	Document Type	Publication Stage	Open Access	Source	EID
A., Tom, Athulya; V., Divya Vijayan, V.; T.K., Kunhamu, Thanduparakkal Kottarakkad; S., Sandeep, Sasidharan; K., Surendra Gopal, Kulkarni; V., Jamaludheen, V.; B.R., Vishnu, B. R.	Tom, Athulya (59556993400); Divya Vijayan, V. (58567792000); Kunhamu, Thanduparakkal Kottarakkad (9744356300); Sandeep, Sasidharan (56352628000); Surendra Gopal, Kulkarni (56672966400); Jamaludheen, V. (6508185890); Vishnu, B. R. (57205454316)	59556993400; 58567792000; 9744356300; 56352628000; 56672966400; 6508185890; 57205454316	Plant diversity and microbial interaction on soil carbon stock in the tropical homegardens: a nature-based solution to climate change	2025	Agroforestry Systems	99	2	29			0	0	10.1007/s10457-025-01135-6	https://www.scopus.com/inward/record.uri?eid=2-s2.0-85217819231&doi=10.1007%2Fs10457-025-01135-6&partnerID=40&md5=8a17ddfa1e973fd36e751ae53eed58da	Kerala Agricultural University, Thrissur, India; Kerala Agricultural University, Thrissur, India; Kerala Forest Research Institute, Peechi, India; Kerala Agricultural University, Thrissur, India; Kerala Agricultural University, Thrissur, India	Tom, Athulya, Department of Silviculture and Agroforestry, Kerala Agricultural University, Thrissur, India; Divya Vijayan, V., Department of Remote Sensing and GIS, Kerala Agricultural University, Thrissur, India; Kunhamu, Thanduparakkal Kottarakkad, Department of Silviculture and Agroforestry, Kerala Agricultural University, Thrissur, India; Sandeep, Sasidharan, Department of Soil Sciences, Kera…	Understanding relationship between plant diversity, microbial activity and carbon sequestration is crucial for mitigating climate change and promoting sustainable land management, particularly in agroforestry systems such as homegardens. This study evaluated five Land Management Type (LMT) which consist of three homegarden classes: Small Homegardens (SHG) (less than 0.2 ha), Medium Homegardens (M…	Agroforestry; Climate Change; Diversity; Homegarden; Soil Carbon Stock; Sustainable Land Management; Agroecology; Biodiversity; Carbon Sequestration; Climate Change; Home Garden; Land Management; Microbial Ecology; Nutrient Cycling; Soil Carbon; Tropical Region; India; Kerala	agroecology; biodiversity; carbon sequestration; climate change; home garden; land management; microbial ecology; nutrient cycling; soil carbon; tropical region; India; Kerala			Adu, J. K., Physical factors influencing decomposition of organic materials in soil aggregates, Soil Biology and Biochemistry, 10, 2, pp. 109-115, (1978); Birhane, Emiru, Carbon stock and woody species diversity in homegarden agroforestry along an elevation gradient in southern Ethiopia, Agroforestry Systems, 94, 3, pp. 1099-1110, (2020); Bray, Roger H., Determination of total, organic, and avail…		Springer Science and Business Media B.V.						15729680; 01674366		AGSYE		English	Article	Final		Scopus	2-s2.0-85217819231
H., Moradi, Halime; J., Noroozi, Jalil; Y., Fourcade, Yoan	Moradi, Halime (57119253400); Noroozi, Jalil (24174944000); Fourcade, Yoan (55624203300)	57119253400; 24174944000; 55624203300	Plant endemic diversity in the Irano-Anatolian global biodiversity hotspot is dramatically threatened by future climate change	2025	Biological Conservation	302		110963			0	7	10.1016/j.biocon.2024.110963	https://www.scopus.com/inward/record.uri?eid=2-s2.0-85214346976&doi=10.1016%2Fj.biocon.2024.110963&partnerID=40&md5=e3a5ef14db0773c0e59219cd4d225338	Universität Hamburg, Hamburg, Germany; Universität Wien, Vienna, Austria; Université Paris-Est Créteil Val de Marne, Creteil, France	Moradi, Halime, Institute of Geography, Universität Hamburg, Hamburg, Germany; Noroozi, Jalil, Department of Botany and Biodiversity Research, Universität Wien, Vienna, Austria; Fourcade, Yoan, Université Paris-Est Créteil Val de Marne, Creteil, France	Climate change is affecting biodiversity across all taxonomic groups and ecosystems globally. Mountain ecosystems are particularly sensitive to climate warming, as temperature is generally a limiting factor for their vegetation. The Irano-Anatolian global biodiversity hotspot, which includes high elevations with a rich endemic biodiversity, offers good opportunities to study the effects of future…	Biodiversity; Climate Change; Endemic Plants; Environmental Suitability; Extinction; Irano-anatolian Gbh; Biodiversity; Climate Change; Community Composition; Endemic Species; Environmental Risk; Extinction; Habitat Structure; Plant Community; Socioeconomic Conditions; Species Diversity; Species Richness	biodiversity; climate change; community composition; endemic species; environmental risk; extinction; habitat structure; plant community; socioeconomic conditions; species diversity; species richness			Aiello-Lammens, Matthew E., spThin: An R package for spatial thinning of species occurrence records for use in ecological niche models, Ecography, 38, 5, pp. 541-545, (2015); Alexander, Jake M., Novel competitors shape species' responses to climate change, Nature, 525, 7570, pp. 515-518, (2015); Amatulli, Giuseppe, Data Descriptor: A suite of global, cross-scale topographic variables for environm…		Elsevier Ltd						63207	0521397863; 9780521397865	BICOB		English	Article	Final	All Open Access; Hybrid Gold Open Access	Scopus	2-s2.0-85214346976
K., Chandra Sekar, K.; N., Thapliyal, Neha; P., Bhojak, Puja; K., Bisht, Kapil; A., Pandey, A.; P., Mehta, Poonam; V.S., Negi, Vikram Singh; R.S., Rawat, Rajendra Singh	Chandra Sekar, K. (55350092700); Thapliyal, Neha (57735611800); Bhojak, Puja (57219701754); Bisht, Kapil (56103698500); Pandey, A. (37361453300); Mehta, Poonam (59273405200); Negi, Vikram Singh (24071671700); Rawat, Rajendra Singh (56052954400)	55350092700; 57735611800; 57219701754; 56103698500; 37361453300; 59273405200; 24071671700; 56052954400	Early signals of climate change impacts on alpine plant diversity in Indian Himalaya	2025	Biodiversity and Conservation	34	1		207	233	0	8	10.1007/s10531-024-02966-y	https://www.scopus.com/inward/record.uri?eid=2-s2.0-86000387066&doi=10.1007%2Fs10531-024-02966-y&partnerID=40&md5=0dcafd5fd2accf6cbce5076e03abb8c3	G.B. Pant National Institute of Himalayan Environment, Almora, India; G.B. Pant National Institute of Himalayan Environment, Almora, India; Indian Institute of Technology Roorkee, Roorkee, India; Hermann Gmeiner Degree College, Bhimtal, Nainital, India; H.N.B.Garhwal University, Garhwal, India	Chandra Sekar, K., Garhwal Regional Centre, G.B. Pant National Institute of Himalayan Environment, Almora, India; Thapliyal, Neha, Garhwal Regional Centre, G.B. Pant National Institute of Himalayan Environment, Almora, India; Bhojak, Puja, Centre for Biodiversity Conservation and Management, G.B. Pant National Institute of Himalayan Environment, Almora, India; Bisht, Kapil, Centre for Biodiversit…	As the global climate scenario is leading towards warmer and dryer conditions, mountain ecosystems and their biota are among the most vulnerable because they are determined by low-temperature conditions. Owing to this, these ecosystems can be used as indicators for climate warming impacts. The present study uses a standardized multi-summit approach as outlined in the Global Observation Research I…	Climate Change Impact On Plant Diversity; Community Composition; Gloria Multi-summit Approach; Indian Himalayan Region; Mountain Ecosystems; Thermophilization; Vegetation Dynamics; Alpine Environment; Climate Change; Community Composition; Mountain Environment; Nestedness; Plant Community; Species Diversity; Species Richness; Thermophily; Vegetation Dynamics; Himalayas	alpine environment; climate change; community composition; mountain environment; nestedness; plant community; species diversity; species richness; thermophily; vegetation dynamics; Himalayas			Ahmad, Mustaqeem, Flower phenological events and duration pattern is influenced by temperature and elevation in Dhauladhar mountain range of Lesser Himalaya, Ecological Indicators, 129, (2021); Alexander, Jake M., Novel competitors shape species' responses to climate change, Nature, 525, 7570, pp. 515-518, (2015); Alpine Biodiversity in Europe, (2003); Baker, Barry B., Advancing treeline and retr…		Springer Science and Business Media B.V.						09603115; 15729710		BONSE		English	Article	Final		Scopus	2-s2.0-86000387066
Y., Zhang, Yi; J., Li, Jianping; Y., Xie, Yingzhong; X., Li, Xiaoyan; X., Luo, Xv; X., Huang, Xumei; Y., Wang, Yutao; J., Yv, Jianfei; X., Liang, Xiaoqian	Zhang, Yi (58873421700); Li, Jianping (37075083400); Xie, Yingzhong (7403959276); Li, Xiaoyan (59328894400); Luo, Xv (59458747500); Huang, Xumei (57764925500); Wang, Yutao (57208188294); Yv, Jianfei (59329297800); Liang, Xiaoqian (57766439200)	58873421700; 37075083400; 7403959276; 59328894400; 59458747500; 57764925500; 57208188294; 59329297800; 57766439200	The Varieties of Plants α-Diversity and Biomass in Desert Grasslands Under the Precipitation Change and Climate Warming	2025	Rangeland Ecology and Management	98			508	517	0	1	10.1016/j.rama.2024.10.008	https://www.scopus.com/inward/record.uri?eid=2-s2.0-85211056454&doi=10.1016%2Fj.rama.2024.10.008&partnerID=40&md5=46ec403f3bd71eae74d05be9b067f484	Xichang University, Xichang, China; Ningxia University, Yinchuan, China	Zhang, Yi, College of Animal Science, Xichang University, Xichang, China, College of Agriculture, Ningxia University, Yinchuan, China; Li, Jianping, College of Agriculture, Ningxia University, Yinchuan, China; Xie, Yingzhong, College of Agriculture, Ningxia University, Yinchuan, China; Li, Xiaoyan, College of Animal Science, Xichang University, Xichang, China; Luo, Xv, College of Agriculture, Nin…	Plants α-diversity and biomass have a significant impact on global climate and environmental changes. The fluctuation of temperature and precipitation caused by climate change is a driving force for the dynamic change of plants α-diversity and biomass. Therefore, our study was conducted in the desert grassland of Ningxia, China (E 107.285, N 37.763), and involved an experiment with five levels of…	Desert Grasslands; Plants Α-diversity And Biomass; Precipitation Change; Warming; Aboveground Biomass; Biodiversity; Climate Change; Climate Conditions; Desert; Environmental Change; Global Climate; Global Warming; Grassland; Precipitation (climatology); Species Richness; Ningxia Huizu	aboveground biomass; biodiversity; climate change; climate conditions; desert; environmental change; global climate; global warming; grassland; precipitation (climatology); species richness; Ningxia Huizu			Biodiversity and Conservation of Woody Plants, (2017); Ali, Mohammad Wazed, Climate change impacts on plant biomass growth, 9789400753709, pp. 1-113, (2013); Baskar, Chinnappan, Preface, 9783642284182, pp. xi-xiii, (2012); Library Journal, (2024); Chen, Ji, Differential responses of ecosystem respiration components to experimental warming in a meadow grassland on the Tibetan Plateau, Agricultural…		Elsevier Inc.						15507424				English	Article	Final		Scopus	2-s2.0-85211056454
R.H., Jayaramaiah, Ramesha H.; C.S., Martins, Catarina S.C.; E., Egidi, Eleonora; C.A., Macdonald, Catriona A.; J., Wang, Juntao; H., Liu, Hongwei; P.B., Reich, Peter B.; M., Delgado-Baquerizo, Manuel; B.K., Singh, Brajesh Kumar	Jayaramaiah, Ramesha H. (56310397700); Martins, Catarina S.C. (56581221800); Egidi, Eleonora (55755955000); Macdonald, Catriona A. (20434241800); Wang, Juntao (56293598000); Liu, Hongwei (56640658700); Reich, Peter B. (7101895179); Delgado-Baquerizo, Manuel (35179276400); Singh, Brajesh Kumar (55262946700)	56310397700; 56581221800; 55755955000; 20434241800; 56293598000; 56640658700; 7101895179; 35179276400; 55262946700	Soil function-microbial diversity relationship is impacted by plant functional groups under climate change	2025	Soil Biology and Biochemistry	200		109623			0	14	10.1016/j.soilbio.2024.109623	https://www.scopus.com/inward/record.uri?eid=2-s2.0-85206621236&doi=10.1016%2Fj.soilbio.2024.109623&partnerID=40&md5=7117e195835b8a5066d06fd6dde011af	Hawkesbury Institute for the Environment, Penrith, Australia; Western Sydney University, Penrith, Australia; Western Sydney University, Penrith, Australia; University of Minnesota Twin Cities, Minneapolis, United States; University of Michigan, Ann Arbor, Ann Arbor, United States; CSIC - Instituto de Recursos Naturales y Agrobiologia de Sevilla (IRNAS), Sevilla, Spain	Jayaramaiah, Ramesha H., Hawkesbury Institute for the Environment, Penrith, Australia; Martins, Catarina S.C., Hawkesbury Institute for the Environment, Penrith, Australia; Egidi, Eleonora, Hawkesbury Institute for the Environment, Penrith, Australia, Global Centre for Land-Based Innovation, Western Sydney University, Penrith, Australia; Macdonald, Catriona A., Hawkesbury Institute for the Enviro…	Understanding the interactions between plant and soil microbial diversity is crucial for predicting ecosystem responses to environmental changes. While the individual roles of plant and microbial diversity in driving ecosystem functions have been widely investigated, their interplay especially under stress conditions remains largely underexplored. This study investigated how interactions between …	Drought; Microbial-plant Diversity Interactions; Plant Functional Groups; Soil Functions; Soil Functions-biodiversity Relationships; Soil Microbial Diversity; Plant Diseases; Environmental Change; Microbial Diversity; Microbial-plant Diversity Interaction; Microbials; Plant Diversity; Plant Functional Groups; Soil Function; Soil Function-biodiversity Relationship; Soil Microbial Diversity; Anthro…	Plant diseases; Environmental change; Microbial diversity; Microbial-plant diversity interaction; Microbials; Plant diversity; Plant functional groups; Soil function; Soil function-biodiversity relationship; Soil microbial diversity; Anthropogenic; biodiversity; climate change; community structure; drought stress; ecosystem resilience; environmental change; environmental stress; functional group;…			Science, (2015); Averill, Colin, Soil microbiome predictability increases with spatial and taxonomic scale, Nature Ecology and Evolution, 5, 6, pp. 747-756, (2021); Cai, Yujia, Variation of soil nitrate and bacterial diversity along soil profiles in manure disposal maize field and adjacent woodland, Journal of Soils and Sediments, 20, 10, pp. 3557-3568, (2020); Canessa, Rafaella, Trait functional…		Elsevier Ltd						380717		SBIOA		English	Article	Final	All Open Access; Hybrid Gold Open Access	Scopus	2-s2.0-85206621236
W.J., Bakker, Wiene J.; T., Morel, Toine; W.A., Ozinga, Wim A.; J.A., Scheper, Jeroen A.; P., Vergeer, Philippine	Bakker, Wiene J. (57215212783); Morel, Toine (59317963100); Ozinga, Wim A. (6602366476); Scheper, Jeroen A. (37021764700); Vergeer, Philippine (6603151936)	57215212783; 59317963100; 6602366476; 37021764700; 6603151936	The relative importance of nitrogen deposition and climate change in driving plant diversity decline in roadside grasslands	2024	Science of the Total Environment	955		176962			0	0	10.1016/j.scitotenv.2024.176962	https://www.scopus.com/inward/record.uri?eid=2-s2.0-85206807113&doi=10.1016%2Fj.scitotenv.2024.176962&partnerID=40&md5=4d7c2b17eefe88db5999b57c8b7afdde	Wageningen University & Research, Wageningen, Netherlands; Rijkswaterstaat, Brussels, Belgium; Wageningen University & Research, Wageningen, Netherlands	Bakker, Wiene J., Plant Ecology and Nature Conservation Group, Wageningen University & Research, Wageningen, Netherlands; Morel, Toine, Rijkswaterstaat, Brussels, Belgium; Ozinga, Wim A., Department of Vegetation and Landscape Ecology, Wageningen University & Research, Wageningen, Netherlands; Scheper, Jeroen A., Plant Ecology and Nature Conservation Group, Wageningen University & Research, Wagen…	Nitrogen deposition and climate change have been identified as major threats to the biodiversity of semi-natural grasslands. Their relative contribution to recent biodiversity loss is however not fully understood, and may depend on local site conditions such as soil type, which hampers efforts to prevent further decline. We used data from >900 permanent plots in semi-natural grasslands in Dutch r…	Biodiversity; Grasslands; Nitrogen Deposition; Productivity; Road Verges; Summer Drought; Winter Warming; Nitrogen; Nitrogen; Soil; Grassland; Interactive Effect; Nitrogen Deposition; No Y; Plant Diversity; Road Verge; Semi-natural Grasslands; Soil Types; Summer Droughts; Winter Warming; Biodiversity; Climate Change; Community Composition; Drought; Grassland; Nitrogen; Plant Community; Roadside E…	Grassland; Interactive effect; Nitrogen deposition; NO y; Plant diversity; Road verge; Semi-natural grasslands; Soil types; Summer droughts; Winter warming; biodiversity; climate change; community composition; drought; grassland; nitrogen; plant community; roadside environment; species diversity; summer; warming; winter; article; nitrogen deposition; nonhuman; trophic level; chemistry; environmen…		nitrogen, 7727-37-9; Nitrogen; Soil	undefined, (2008); Bardgett, Richard D., Combatting global grassland degradation, Nature Reviews Earth and Environment, 2, 10, pp. 720-735, (2021); Mumin Multi Model Inference, (2015); Basto, Sofía, Long-term nitrogen deposition depletes grassland seed banks, Nature Communications, 6, (2015); Basto, Sofía, Severe effects of long-term drought on calcareous grassland seed banks, npj Climate and Atm…		Elsevier B.V.						00489697; 18791026		STEVA	39423894	English	Article	Final	All Open Access; Green Accepted Open Access; Green Open Access; Hybrid Gold Open Access	Scopus	2-s2.0-85206807113
M., Braz Pires, Mariana; K., Kougioumoutzis, Konstantinos; S.J., Norder, Sietze J.; P., Dimopoulos, Panayotis; A., Strid, Arne; M., Panitsa, Maria	Braz Pires, Mariana (59093194300); Kougioumoutzis, Konstantinos (55014642500); Norder, Sietze J. (56202357400); Dimopoulos, Panayotis (7006307181); Strid, Arne (7004163241); Panitsa, Maria (6506787287)	59093194300; 55014642500; 56202357400; 7006307181; 7004163241; 6506787287	The future of plant diversity within a Mediterranean endemism centre: Modelling the synergistic effects of climate and land-use change in Peloponnese, Greece	2024	Science of the Total Environment	947		174622			0	6	10.1016/j.scitotenv.2024.174622	https://www.scopus.com/inward/record.uri?eid=2-s2.0-85198395901&doi=10.1016%2Fj.scitotenv.2024.174622&partnerID=40&md5=3938c877819f803f317630bc3ea71e6c	Copernicus Institute of Sustainable Development, Utrecht, Netherlands; University of Patras, Rio, Greece; Bakkerej 6, Orbak, Denmark; Universiteit Leiden, Leiden, Netherlands	Braz Pires, Mariana, Copernicus Institute of Sustainable Development, Utrecht, Netherlands, Universiteit Leiden, Leiden, Netherlands; Kougioumoutzis, Konstantinos, Department of Biology, University of Patras, Rio, Greece; Norder, Sietze J., Copernicus Institute of Sustainable Development, Utrecht, Netherlands; Dimopoulos, Panayotis, Department of Biology, University of Patras, Rio, Greece; Strid,…	Climate- and land-use change stand as primary threats to terrestrial biodiversity. Yet, their synergistic impacts on species distributions remain poorly understood. To address this knowledge gap, we conducted the first-ever comprehensive species distribution analysis on an entire regional endemism centre within an eastern Mediterranean country, incorporating dynamic land-use/land-cover change dat…	Climate Change; Endemic Plant; Land-use/land-cover Change; Mediterranean Flora; Phylogenetic Endemism; Species Distribution Modelling (sdm); Biodiversity; Climate Change; Ecosystems; Land Use; Population Distribution; Endemic Plants; Hotspots; Land-use Land-cover Changes; Landuse Change; Mediterranean Flora; Phylogenetic Endemism; Phylogenetics; Species Distribution Modeling; Synergistic Effect; …	Biodiversity; Climate change; Ecosystems; Land use; Population distribution; Endemic plants; Hotspots; Land-use land-cover changes; Landuse change; Mediterranean flora; Phylogenetic endemism; Phylogenetics; Species distribution modeling; Synergistic effect; Phylogenetic; anthropogenic effect; biodiversity; climate change; climate effect; conservation management; conservation planning; endangered …			Aiello-Lammens, Matthew E., spThin: An R package for spatial thinning of species occurrence records for use in ecological niche models, Ecography, 38, 5, pp. 541-545, (2015); Allouche, Omri, Assessing the accuracy of species distribution models: Prevalence, kappa and the true skill statistic (TSS), Journal of Applied Ecology, 43, 6, pp. 1223-1232, (2006); Barbet-Massin, Morgane, Selecting pseudo-…		Elsevier B.V.						00489697; 18791026		STEVA	38992359	English	Article	Final	All Open Access; Hybrid Gold Open Access	Scopus	2-s2.0-85198395901
T., Anju, Thattantavide; A., Kumar, Ajay	Anju, Thattantavide (57218578935); Kumar, Ajay (57781966600)	57218578935; 57781966600	Traditional ecological knowledge and medicinal plant diversity usage among the Mullu Kuruman tribes of Wayanad district of Kerala, India and its implications for biodiversity conservation in the face of climate change	2024	Trees, Forests and People	16		100595			0	13	10.1016/j.tfp.2024.100595	https://www.scopus.com/inward/record.uri?eid=2-s2.0-85195594698&doi=10.1016%2Fj.tfp.2024.100595&partnerID=40&md5=49b40d205f4905dfa509230e69ae23f2	Central University of Kerala, Kasaragod, India	Anju, Thattantavide, Department of Plant Sciences, Central University of Kerala, Kasaragod, India; Kumar, Ajay, Department of Plant Sciences, Central University of Kerala, Kasaragod, India	Mullu Kuruman tribes majorly reside in the Wayanad district of Kerala, India. Their dietary practices and food systems are deeply intertwined with wild and underutilised plants, but modern interventions and globalisation have altered them. Therefore, understanding their traditional ecological knowledge regarding the plants used for food and medicine is important for biodiversity conservation and …	Biodiversity Conservation; Forest Rights Act; Indigenous Tribe; Non Timber Forest Products; Traditional Ecological Knowledge; Wild Food Plants; Biodiversity; Climate Change; Conservation Management; Forest Management; Indigenous Population; Medicinal Plant; Nontimber Forest Product; Traditional Knowledge; India; Kerala; Wayanad	biodiversity; climate change; conservation management; forest management; indigenous population; medicinal plant; nontimber forest product; traditional knowledge; India; Kerala; Wayanad			Acharya, Biswajeet, Bamboo shoots: an exploration into its culinary heritage in India and its nutraceutical potential, Journal of Ethnic Foods, 10, 1, (2023); Akinola, Rachael Adeyanju, A review of indigenous food crops in Africa and the implications for more sustainable and healthy food systems, Sustainability (Switzerland), 12, 8, (2020); Ali, Akib, Nutrition security, constraints, and agro-div…		Elsevier B.V.						26667193				English	Article	Final	All Open Access; Gold Open Access	Scopus	2-s2.0-85195594698
P.A., Peralta, Patricia Angélica; M.J., Nores, Marı́a Jimena; H.G., Bach, Hernán Gerónimo; S.F., Robbiati, Sergio Federico	Peralta, Patricia Angélica (56002973300); Nores, Marı́a Jimena (6603554750); Bach, Hernán Gerónimo (36951341800); Robbiati, Sergio Federico (55922974500)	56002973300; 6603554750; 36951341800; 55922974500	Facing climate change: Range dynamics and chromosome diversity in Hedeoma multiflora Benth., a South American aromatic-medicinal plant at risk	2024	Flora: Morphology, Distribution, Functional Ecology of Plants	315		152519			0	2	10.1016/j.flora.2024.152519	https://www.scopus.com/inward/record.uri?eid=2-s2.0-85191823551&doi=10.1016%2Fj.flora.2024.152519&partnerID=40&md5=b35b542b3e7a158c142f00544ba300b5	Instituto Nacional de Tecnología Agropecuaria Buenos Aires, Buenos Aires, Argentina; Instituto Multidisciplinario de Biología Vegetal, Cordoba, Argentina; Universidad Nacional de Córdoba, Cordoba, Argentina	Peralta, Patricia Angélica, Instituto de Recursos Biológicos, Instituto Nacional de Tecnología Agropecuaria Buenos Aires, Buenos Aires, Argentina; Nores, Marı́a Jimena, Instituto Multidisciplinario de Biología Vegetal, Cordoba, Argentina, Facultad de Ciencias Exactas, Universidad Nacional de Córdoba, Cordoba, Argentina; Bach, Hernán Gerónimo, Instituto de Recursos Biológicos, Instituto Nacional d…	Climate change could significantly affect the geographic distribution of plant species. Hedeoma multiflora is a vulnerable medicinal and aromatic herb that distributes in the Pampa, Espinal and Chaco biogeographic provinces in austral South America. This integrated approach combines ecological models and cytogenetic evidence to assess the effects of climate change on this species. Species distrib…	Climate Change; Conservation; Distribution Pattern; Gcms; Ploidy; South America; Chromosome; Climate Change; Geographical Distribution; Integrated Approach; Medicinal Plant; Seasonality; Species Conservation; South America	chromosome; climate change; geographical distribution; integrated approach; medicinal plant; seasonality; species conservation; South America			Abolmaali, Seyed Mohammad Reza, MaxEnt modeling for predicting suitable habitats and identifying the effects of climate change on a threatened species, Daphne mucronata, in central Iran, Ecological Informatics, 43, pp. 116-123, (2018); Alaggia, Francisco G., The hypothetical effect of climate change on the distribution of two Chaco Serrano woody species., Ecologia Austral, 32, 2, pp. 319-330, (20…		Elsevier GmbH						3672530		FLRAB		English	Article	Final		Scopus	2-s2.0-85191823551
M.A., Ortega, Miguel Angel; L., Cayuela, L.; D.M., Griffith, Daniel M.; A., Camacho, Angélica; I.M., Coronado, Indiana Maria; R.F., Del Castillo, Rafael F.; B.L., Figueroa-Rangel, Blanca Lorena; W., Fonseca, William; C., Garibaldi, Cristina; D.L., Kelly, Daniel Lucius	Ortega, Miguel Angel (35076394100); Cayuela, L. (13002599500); Griffith, Daniel M. (26659951500); Camacho, Angélica (58912353300); Coronado, Indiana Maria (15758943600); Del Castillo, Rafael F. (6701842462); Figueroa-Rangel, Blanca Lorena (6507781926); Fonseca, William (39361505600); Garibaldi, Cristina (56423541000); Kelly, Daniel Lucius (7403137076)	35076394100; 13002599500; 26659951500; 58912353300; 15758943600; 6701842462; 6507781926; 39361505600; 56423541000; 7403137076	Climate change increases threat to plant diversity in tropical forests of Central America and southern Mexico	2024	PLOS ONE	19	2025-02-02	e0297840			0	7	10.1371/journal.pone.0297840	https://www.scopus.com/inward/record.uri?eid=2-s2.0-85186297193&doi=10.1371%2Fjournal.pone.0297840&partnerID=40&md5=f4e8f35d6ebaffd7d3c19eb385bc2652	CSIC-UO-PA - Instituto Mixto de Investigación en Biodiversidad (IMIB), Mieres, Spain; Universidad Internacional Menéndez Pelayo, Madrid, Spain; Universidad Rey Juan Carlos, Madrid, Spain; Universidad Técnica Particular de Loja, Loja, Ecuador; Universidad Intercultural de Chiapas, Corral de Piedra, Mexico; National Autonomous University of Nicaragua, Leon, Leon, Nicaragua; Instituto Politécnico Na…	Ortega, Miguel Angel, CSIC-UO-PA - Instituto Mixto de Investigación en Biodiversidad (IMIB), Mieres, Spain, Universidad Internacional Menéndez Pelayo, Madrid, Spain; Cayuela, L., Departamento de Biología y Geología, Universidad Rey Juan Carlos, Madrid, Spain; Griffith, Daniel M., Departamento de Ciencias Biológicas y Agropecuarias, Universidad Técnica Particular de Loja, Loja, Ecuador; Camacho, A…	Global biodiversity is negatively affected by anthropogenic climate change. As species distributions shift due to increasing temperatures and precipitation fluctuations, many species face the risk of extinction. In this study, we explore the expected trend for plant species distributions in Central America and southern Mexico under two alternative Representative Concentration Pathways (RCPs) port…	Article; Biodiversity; Central America; Climate Change; Climate Resilience; Diurnal Temperature Range; Endangered Species; Greenhouse Gas Emission; International Union For Conservation Of Nature; Mexico; Nonhuman; Precipitation; Species Distribution; Temperature; Tropical Forest; Vulnerability; Animal; Forest; Animals; Biodiversity; Climate Change; Endangered Species; Forests	article; biodiversity; Central America; climate change; climate resilience; diurnal temperature range; endangered species; greenhouse gas emission; International Union for Conservation of Nature; Mexico; nonhuman; precipitation; species distribution; temperature; tropical forest; vulnerability; animal; forest; Animals; Biodiversity; Climate Change; Endangered Species; Forests			Sala, Osvaldo E., Global biodiversity scenarios for the year 2100, Science, 287, 5459, pp. 1770-1774, (2000); Walther, Gian Reto, Ecological responses to recent climate change, Nature, 416, 6879, pp. 389-395, (2002); Bellard, Céline, Impacts of climate change on the future of biodiversity, Ecology Letters, 15, 4, pp. 365-377, (2012); Fadrique, Belén, Widespread but heterogeneous responses of Ande…		Public Library of Science						19326203		POLNC	38422027	English	Article	Final	All Open Access; Gold Open Access; Green Final Open Access; Green Open Access	Scopus	2-s2.0-85186297193
C., Soliani, Carolina; V., Ceccarelli, Viviana; M.V., Lantschner, María Victoria; E., Thomas, Evert; P., Marchelli, Paula	Soliani, Carolina (24725400200); Ceccarelli, Viviana (57218909482); Lantschner, María Victoria (22134619500); Thomas, Evert (23471373100); Marchelli, Paula (6602664222)	24725400200; 57218909482; 22134619500; 23471373100; 6602664222	Predicting the distribution of plant species from southern South America: are the hotspots of genetic diversity threatened by climate change?	2024	Biodiversity and Conservation	33	2		725	757	0	5	10.1007/s10531-023-02770-0	https://www.scopus.com/inward/record.uri?eid=2-s2.0-85183423949&doi=10.1007%2Fs10531-023-02770-0&partnerID=40&md5=d61ddaf8fca1a89d777b387b53c5186f	Consejo Nacional de Investigaciones Científicas y Técnicas, Buenos Aires, Argentina; Bioversity International, Rome, Italy; University of Leeds, Leeds, United Kingdom	Soliani, Carolina, Consejo Nacional de Investigaciones Científicas y Técnicas, Buenos Aires, Argentina; Ceccarelli, Viviana, Bioversity International, Rome, Italy, Ecology and Global Change, University of Leeds, Leeds, United Kingdom; Lantschner, María Victoria, Consejo Nacional de Investigaciones Científicas y Técnicas, Buenos Aires, Argentina; Thomas, Evert, Bioversity International, Rome, Ital…	Biodiversity in all its dimensions is being threatened by climate change and the impact of human activities. Genetic diversity is a key dimension of biodiversity underlying adaptation to global changes. Here we assess the impact of climate change on plant genetic diversity in a region located in the southernmost portion of Argentina and Chile range. We compiled available published research on pop…	Biodiversity; Ecoregions; Future Suitability Areas; Genetic Hotspots; Native Species; Adaptation; Biodiversity; Climate Change; Ecoregion; Native Species; Plant; Population Genetics; Species Richness; Steppe; South America	adaptation; biodiversity; climate change; ecoregion; native species; plant; population genetics; species richness; steppe; South America			Abraham, Elena María, Disentangling the concept of “South American Arid Diagonal”, Journal of Arid Environments, 175, (2020); Alarcón, Diego, In the right place at the right time: Habitat representation in protected areas of South American Nothofagus-dominated plants after a dispersal constrained climate change scenario, PLOS ONE, 10, 3, (2015); Alarcón, Diego, Relationships between ecological ni…		Springer Science and Business Media B.V.						09603115; 15729710		BONSE		English	Article	Final		Scopus	2-s2.0-85183423949
D.J., McDonald, David J.; G.F., Midgley, Guy F.; L.W., Powrie, Leslie Ward	McDonald, David J. (7201822791); Midgley, Guy F. (7006003164); Powrie, Leslie Ward (6602739628)	7201822791; 7006003164; 6602739628	Scenarios of Plant Diversity in South African Mountain Ranges in Relation to Climate Change	2024					261	266	0	0	10.1201/9781003579519-24	https://www.scopus.com/inward/record.uri?eid=2-s2.0-85210697834&doi=10.1201%2F9781003579519-24&partnerID=40&md5=97c092e2851d79f20cc5a29f1f287c7e	Botanical Society of South Africa, Claremont, South Africa; South African National Biodiversity Institute, Pretoria, South Africa	McDonald, David J., Botanical Society of South Africa, Claremont, South Africa; Midgley, Guy F., Climate Change Research Group, South African National Biodiversity Institute, Pretoria, South Africa; Powrie, Leslie Ward, Climate Change Research Group, South African National Biodiversity Institute, Pretoria, South Africa	Africa has a long and impressive geological history that has resulted in the mountains we see today. The most significant mountains of South Africa are the Drakensberg Range and the Cape Fold Mountains. Compared with mountainous regions of the world, including the mountains of East and Central Africa, the mountains of southern Africa are relatively low. Only a few peaks in the Cape Fold Mountains…					Palaeoecology of Africa, (1967); Vegetation of Southern Africa, (1997); Acta Phytogeographica Suecica, (1964); Memoirs of the Botanical Survey of South Africa, (1963); Heathlands and Related Shrublands Descriptive Studies, (1979); Bothalia, (1978); Biogeography and Ecology of Southern Africa, (1978); Killick, D. J.B., Further data on the climate of the alpine vegetation belt of eastern Lesotho ( …		CRC Press							9781040284315; 9781842140918			English	Book chapter	Final		Scopus	2-s2.0-85210697834
A., Azeem, Asad; M., Zia Ul Haq, Muhammad; H.U., Rasheed, Haroon Ur; S., Uddin, Safeer; M.U.D., Dullu, Muhammad Umar Draz; S., Azeem, Sonia; M.S., Zaman, Muhammad Sikandar	Azeem, Asad (57224904475); Zia Ul Haq, Muhammad (59402303200); Rasheed, Haroon Ur (58859057800); Uddin, Safeer (58858281500); Dullu, Muhammad Umar Draz (58858671100); Azeem, Sonia (58859057900); Zaman, Muhammad Sikandar (58858474300)	57224904475; 59402303200; 58859057800; 58858281500; 58858671100; 58859057900; 58858474300	Bridging the gap between climate change and plant biology: Enhancing resilience through genetic diversity and agroecological practices	2023					173	193	0	0	10.4018/978-1-6684-9838-5.ch008	https://www.scopus.com/inward/record.uri?eid=2-s2.0-85183804064&doi=10.4018%2F978-1-6684-9838-5.ch008&partnerID=40&md5=a69a31528393826bcd8aeb03f6a599ce	University of Agriculture, Faisalabad, Faisalabad, Pakistan; University of Agriculture, Faisalabad, Faisalabad, Pakistan; University of Agriculture, Faisalabad, Faisalabad, Pakistan; University of Agriculture, Faisalabad, Faisalabad, Pakistan; PMAS-Arid Agriculture University Rawalpindi, Rawalpindi, Pakistan; Government College University Faisalabad, Faisalabad, Pakistan	Azeem, Asad, Department of Plant Breeding and Genetics, University of Agriculture, Faisalabad, Faisalabad, Pakistan; Zia Ul Haq, Muhammad, Department of Agronomy, University of Agriculture, Faisalabad, Faisalabad, Pakistan; Rasheed, Haroon Ur, University of Agriculture, Faisalabad, Faisalabad, Pakistan; Uddin, Safeer, University of Agriculture, Faisalabad, Faisalabad, Pakistan; Dullu, Muhammad Um…	The inherent genetic diversity of crops equips them with a remarkable ability to adapt to shifting envi¬ronmental conditions, a crucial aspect of crop resilience. This adaptability stems from the vast array of traits and characteristics encoded within their genomes, enabling them to respond to diverse envi¬ronmental challenges. By subjecting crops to stress conditions, breeders can identify indiv…					Abobatta, Waleed Fouad, The influence of climate change on interactions between environmental stresses and plants, pp. 425-434, (2023); Understanding the Impact of Global Climate Change on Abiotic Stress in Plants and the Supportive Role of Pgpr, (2023); Ahmed, Mukhtar, Impact of Climate Change on Dryland Agricultural Systems: A Review of Current Status, Potentials, and Further Work Need, Interna…		IGI Global							9781668498385; 9781668498408			English	Book chapter	Final		Scopus	2-s2.0-85183804064
M.A., Schuchardt, Max Anatol; B.J., Berauer, Bernd Josef; A., Duc, Anhle; J., Ingrisch, Johannes; Y., Niu, Yujie; M., Bahn, Michael; A., Jentsch, Anke	Schuchardt, Max Anatol (57212111348); Berauer, Bernd Josef (57191569751); Duc, Anhle (58526071900); Ingrisch, Johannes (56440269600); Niu, Yujie (57195249671); Bahn, Michael (7003969980); Jentsch, Anke (6602883636)	57212111348; 57191569751; 58526071900; 56440269600; 57195249671; 7003969980; 6602883636	Increases in functional diversity of mountain plant communities is mainly driven by species turnover under climate change	2023	Oikos	2023	11	e09922			0	10	10.1111/oik.09922	https://www.scopus.com/inward/record.uri?eid=2-s2.0-85166949267&doi=10.1111%2Foik.09922&partnerID=40&md5=bf68f4759f83d0c17d0f8a5713ccaa7d	Universität Bayreuth, Bayreuth, Germany; Universität Hohenheim, Stuttgart, Germany; Universität Innsbruck, Innsbruck, Austria	Schuchardt, Max Anatol, Department of Disturbance Ecology, Universität Bayreuth, Bayreuth, Germany; Berauer, Bernd Josef, Department of Plant Ecology, Universität Hohenheim, Stuttgart, Germany; Duc, Anhle, Department of Disturbance Ecology, Universität Bayreuth, Bayreuth, Germany; Ingrisch, Johannes, Department of Ecology, Universität Innsbruck, Innsbruck, Austria; Niu, Yujie, Department of Distu…	Warming in mountain regions is projected to be three times faster than the global average. Pronounced climate change will likely lead to species reshuffling in mountain plant communities and consequently change ecosystem resilience and functioning. Yet, little is known about the role of inter- versus intraspecific changes of plant traits and their consequences for functional richness and evenness…	Climate Change; Colonization; Ecosystem Function; Functional Group; Lowland Environment; Mountain Region; Niche; Plant Community; Species Diversity; Species Evenness; Species Richness; Turnover; Alps; Austria; Switzerland	climate change; colonization; ecosystem function; functional group; lowland environment; mountain region; niche; plant community; species diversity; species evenness; species richness; turnover; Alps; Austria; Switzerland			Albert, Cécile Hélène, When and how should intraspecific variability be considered in trait-based plant ecology?, Perspectives in Plant Ecology, Evolution and Systematics, 13, 3, pp. 217-225, (2011); Alexander, Jake M., Novel competitors shape species' responses to climate change, Nature, 525, 7570, pp. 515-518, (2015); Alexander, Jake M., Lags in the response of mountain plant communities to cli…		John Wiley and Sons Inc						16000706; 00301299		OIKSA		English	Article	Final	All Open Access; Green Final Open Access; Green Open Access; Hybrid Gold Open Access	Scopus	2-s2.0-85166949267
F., Ssali, Fredrick; B., Mugerwa, Badru; M., van Heist, Miriam; D., Sheil, Douglas; B., Kirunda, Ben; M.L., Musicante, Mariana Laura; A., Seimon, Anton; S.R.P., Halloy, Stephan R.P.	Ssali, Fredrick (54880046600); Mugerwa, Badru (57193330961); van Heist, Miriam (6505885809); Sheil, Douglas (57218803045); Kirunda, Ben (56282460600); Musicante, Mariana Laura (57224256600); Seimon, Anton (6506703348); Halloy, Stephan R.P. (6603627115)	54880046600; 57193330961; 6505885809; 57218803045; 56282460600; 57224256600; 6506703348; 6603627115	Plant diversity and composition vary with elevation on two equatorial high mountains in Uganda: baselines for assessing the influence of climate change	2023	Alpine Botany	133	2		149	161	0	3	10.1007/s00035-023-00301-9	https://www.scopus.com/inward/record.uri?eid=2-s2.0-85169598574&doi=10.1007%2Fs00035-023-00301-9&partnerID=40&md5=bf708660f03103f6e20a6d11f0ecc2fd	Mbarara University of Science and Technology, Mbarara, Uganda; Leibniz-Institut für Zoo- und Wildtierforschung, Berlin, Germany; Technische Universität Berlin, Berlin, Germany; Wageningen University & Research, Wageningen, Netherlands; Wageningen University & Research, Wageningen, Netherlands; Norges Miljø- og Biovitenskapelige Universitet, As, Norway; Center for International Forestry Research (…	Ssali, Fredrick, Institute of Tropical Forest Conservation, Mbarara University of Science and Technology, Mbarara, Uganda; Mugerwa, Badru, Institute of Tropical Forest Conservation, Mbarara University of Science and Technology, Mbarara, Uganda, Department of Ecological Dynamics, Leibniz-Institut für Zoo- und Wildtierforschung, Berlin, Germany, Department of Ecology, Technische Universität Berlin,…	We describe the distribution and diversity of vascular plants at high elevations (3980–4570 m above sea level) in the Rwenzori Mountains and Mount Elgon National Parks in Uganda. These were the first target regions of the “Global Observation Research Initiative in Alpine Environments” (“GLORIA”) on the African continent. In each target region, four summits spanning elevations from the treeline ec…	Afroalpine Species; Biogeography; Climate Change; Climate Warming; Endemism; Mount Elgon; Rwenzori Mountains; Species Richness; Biogeography; Climate Change; Ecotone; Endemism; Species Richness; Vascular Plant; Mount Elgon; Rwenzori Mountains	biogeography; climate change; ecotone; endemism; species richness; vascular plant; Mount Elgon; Rwenzori Mountains			Beck, Erwin H., Frost avoidance and freezing tolerance in Afroalpine ‘giant rosette’ plants, Plant, Cell and Environment, 5, 3, pp. 215-222, (1982); Ecological Monographs, (1957); Brochmann, Christian, History and evolution of the afroalpine flora: in the footsteps of Olov Hedberg, Alpine Botany, 132, 1, pp. 65-87, (2022); Butynski, Thomas M., Three new mountain national parks for Uganda, Oryx, 2…		Springer Science and Business Media Deutschland GmbH						1664221X; 16642201				English	Article	Final		Scopus	2-s2.0-85169598574
R., Bordoloi, Reetashree; A.R., Sharma, Aribam Rocky; B., Das, Biswajit; G., Teron, Genius; L.T., Thungon, Lobsang Tashi; A., Paul, Ashish; L.B., Singha, L. B.; O.P., Tripathi, Om Prakash	Bordoloi, Reetashree (57195726048); Sharma, Aribam Rocky (57913423900); Das, Biswajit (57216106660); Teron, Genius (57913635300); Thungon, Lobsang Tashi (57215716988); Paul, Ashish (12140144800); Singha, L. B. (6507370554); Tripathi, Om Prakash (15052578000)	57195726048; 57913423900; 57216106660; 57913635300; 57215716988; 12140144800; 6507370554; 15052578000	Plant diversity and variation in soil properties of selected land use types of Arunachal Pradesh: a local climate change perspective	2023	Vegetos	36	3		950	960	0	2	10.1007/s42535-022-00484-2	https://www.scopus.com/inward/record.uri?eid=2-s2.0-85139150967&doi=10.1007%2Fs42535-022-00484-2&partnerID=40&md5=6301d1bdf388a8cba63e29329c68870b	North Eastern Regional Institute of Science and Technology, Itanagar, India; Manipur University, Imphal, India; Mizoram University, Aizawl, India	Bordoloi, Reetashree, Department of Forestry, North Eastern Regional Institute of Science and Technology, Itanagar, India; Sharma, Aribam Rocky, Department of Forestry, North Eastern Regional Institute of Science and Technology, Itanagar, India; Das, Biswajit, Department of Forestry, North Eastern Regional Institute of Science and Technology, Itanagar, India; Teron, Genius, Department of Forestry…	Changes in the pattern of land use and climate have increasingly threatened the terrestrial ecosystem. The study aims to quantify the responses of modified land use on species diversity and soil properties and also to document the local perceptions of climate change in the region. A total of 10 tree species, 10 shrub species and 12 herb species were recorded from the Seru area of Tawang district,…	Climate; Perceptions; Phytosociology; Soil Characteristics; Species Composition				Adigbli, David M., Effects of Broussonetia papyrifera invasion and land use on vegetation characteristics in a tropical forest of Ghana, Journal of Forestry Research, 30, 4, pp. 1363-1373, (2019); Chemical Analysis of Ecological Materials, (1989); Augusto, Laurent, Impact of several common tree species of European temperate forests on soil fertility, Annals of Forest Science, 59, 3, pp. 233-253, …		Springer						22294473; 09704078				English	Article	Final		Scopus	2-s2.0-85139150967
S., Huang, Shaolin; G., Fu, Gang	Huang, Shaolin (57995171400); Fu, Gang (54784232800)	57995171400; 54784232800	Impacts of Climate Change and Human Activities on Plant Species α-Diversity across the Tibetan Grasslands	2023	Remote Sensing	15	11	2947			0	29	10.3390/rs15112947	https://www.scopus.com/inward/record.uri?eid=2-s2.0-85161569408&doi=10.3390%2Frs15112947&partnerID=40&md5=7788bc765a964ae9a9f719a95ef4f211	Institute of Geographic Sciences and Natural Resources Research, Chinese Academy of Sciences, Beijing, China	Huang, Shaolin, Key Laboratory of Ecosystem Network Observation and Modeling, Institute of Geographic Sciences and Natural Resources Research, Chinese Academy of Sciences, Beijing, China; Fu, Gang, Key Laboratory of Ecosystem Network Observation and Modeling, Institute of Geographic Sciences and Natural Resources Research, Chinese Academy of Sciences, Beijing, China	Plant species α-diversity is closely correlated with ecosystem structures and functions. However, whether climate change and human activities will reduce plant species α-diversity remains controversial. In this study, potential (i.e., potential species richness: SRp, Shannonp, Simpsonp and Pieloup) and actual plant species α-diversity (i.e., actual species richness: SRa, Shannona, Simpsona and Pi…	Alpine Region; Asymmetrical Warming; Biodiversity; Temperature Sensitivity; Tibetan Plateau; Biodiversity; Forestry; Alpine Meadow; Alpine Regions; Asymmetrical Warming; Human Activities; On Potentials; Plant Species; Plant Species Richness; Species Richness; Temperature Sensitivity; Tibetan Plateau; Climate Change	Biodiversity; Forestry; Alpine meadow; Alpine regions; Asymmetrical warming; Human activities; On potentials; Plant species; Plant species richness; Species richness; Temperature sensitivity; Tibetan Plateau; Climate change			Pauli, Harald, Recent plant diversity changes on Europe's mountain summits, Science, 336, 6079, pp. 353-355, (2012); Brummitt, Neil Alistair, Areas of plant diversity—What do we know?, Plants People Planet, 3, 1, pp. 33-44, (2021); Han, Fusong, Temperature sensitivities of aboveground net primary production, species and phylogenetic diversity do not increase with increasing elevation in alpine gr…		MDPI						20724292	9780891814184; 0891814183; 9780123694072			English	Article	Final	All Open Access; Gold Open Access; Green Accepted Open Access; Green Open Access	Scopus	2-s2.0-85161569408
Y., Peng, Yu; J., Xin, Jiaxun; N., Peng, Nanyi	Peng, Yu (56415411800); Xin, Jiaxun (57893432500); Peng, Nanyi (57893185900)	56415411800; 57893432500; 57893185900	Climate change alters the spatial pattern of plant spectral diversity across forest types	2023	Frontiers in Ecology and Evolution	11		1137111			0	1	10.3389/fevo.2023.1137111	https://www.scopus.com/inward/record.uri?eid=2-s2.0-85166757368&doi=10.3389%2Ffevo.2023.1137111&partnerID=40&md5=1424ffacbfff28b0e643c4652736e86e	Minzu University of China, Beijing, China	Peng, Yu, College of Life and Environmental Sciences, Minzu University of China, Beijing, China; Xin, Jiaxun, College of Life and Environmental Sciences, Minzu University of China, Beijing, China; Peng, Nanyi, College of Life and Environmental Sciences, Minzu University of China, Beijing, China	Species distribution, spatial distance, and neighboring interact6ions are among the most important drivers of global variation in plant species diversity. However, the effects of climate change on the relationship between spatial interactions and species diversity remain unknown. Here, we applied 12 machine learning models to assess the responses of spectral diversity (indicating species diversit…	Climate Change; Forests; Macroecology; Spatial Distance; Species Diversity; Spectral Diversity				Aguirre-Gutiérrez, Jesús, Drier tropical forests are susceptible to functional changes in response to a long-term drought, Ecology Letters, 22, 5, pp. 855-865, (2019); Baselga, Andrés, Multiple site dissimilarity quantifies compositional heterogeneity among several sites, while average pairwise dissimilarity may be misleading, Ecography, 36, 2, pp. 124-128, (2013); Biswas, Shekhar R., Disturbance…		Frontiers Media SA						2296701X				English	Article	Final	All Open Access; Gold Open Access	Scopus	2-s2.0-85166757368
S., Garcés-Pastor, Sandra; E., Coissac, Eric; S., Lavergne, Sébastien; C., Schwörer, Christoph; J.P., Theurillat, Jean Paul; P.D., Heintzman, Peter D.; O.S., Wangensteen, Owen S.; W., Tinner, Willy; F., Rey, Fabian; M., Heer, Martina	Garcés-Pastor, Sandra (57194156900); Coissac, Eric (6602311100); Lavergne, Sébastien (6602469604); Schwörer, Christoph (54915156500); Theurillat, Jean Paul (6603930958); Heintzman, Peter D. (55978604800); Wangensteen, Owen S. (36563101200); Tinner, Willy (6603343994); Rey, Fabian (55847807700); Heer, Martina (57757982700)	57194156900; 6602311100; 6602469604; 54915156500; 6603930958; 55978604800; 36563101200; 6603343994; 55847807700; 57757982700	High resolution ancient sedimentary DNA shows that alpine plant diversity is associated with human land use and climate change	2022	Nature Communications	13	1	6559			0	61	10.1038/s41467-022-34010-4	https://www.scopus.com/inward/record.uri?eid=2-s2.0-85141485939&doi=10.1038%2Fs41467-022-34010-4&partnerID=40&md5=9b2d7decc289aa584806681d21480bb1	UiT Norges Arktiske Universitet, Tromso, Norway; Université Grenoble Alpes, Saint Martin d'Heres, France; University of Bern, Bern, Switzerland; Université de Genève, Geneva, Switzerland; UiT Norges Arktiske Universitet, Tromso, Norway; Universitat de Barcelona, Barcelona, Spain; Universität Basel, Basel, Switzerland; University of York, York, United Kingdom; Uniwersytet im. Adama Mickiewicza w P…	Garcés-Pastor, Sandra, UiT Norges Arktiske Universitet, Tromso, Norway; Coissac, Eric, Université Grenoble Alpes, Saint Martin d'Heres, France; Lavergne, Sébastien, Université Grenoble Alpes, Saint Martin d'Heres, France; Schwörer, Christoph, University of Bern, Bern, Switzerland; Theurillat, Jean Paul, Department of Plant Sciences, Université de Genève, Geneva, Switzerland; Heintzman, Peter D., …	The European Alps are highly rich in species, but their future may be threatened by ongoing changes in human land use and climate. Here, we reconstructed vegetation, temperature, human impact and livestock over the past ~12,000 years from Lake Sulsseewli, based on sedimentary ancient plant and mammal DNA, pollen, spores, chironomids, and microcharcoal. We assembled a highly-complete local DNA ref…	Dna, Ancient; Bronze Age; Climate Change; Dna; Human Activity; Land Use; Plant Community; Species Diversity; Alps; Article; Bacterial Spore; Chironomidae; Deforestation; Grazing; Holocene; Human; Human Impact (environment); Livestock; Mammal; Middle Ages; Neolithic; Nonhuman; Precipitation; Vegetation; Genetics; Lake; Plant; Pollen; Ancient Dna; Climate Change; Dna, Ancient; Humans; Lakes; Plants…	Bronze Age; climate change; DNA; human activity; land use; plant community; species diversity; Alps; article; bacterial spore; Chironomidae; deforestation; grazing; Holocene; human; human impact (environment); livestock; mammal; Middle Ages; Neolithic; nonhuman; precipitation; vegetation; genetics; lake; plant; pollen; ancient DNA; Climate Change; DNA, Ancient; Humans; Lakes; Plants; Pollen		DNA, Ancient	Trisos, Christopher Harry, The projected timing of abrupt ecological disruption from climate change, Nature, 580, 7804, pp. 496-501, (2020); Schwörer, Christoph, Holocene climate, fire and vegetation dynamics at the treeline in the Northwestern Swiss Alps, Vegetation History and Archaeobotany, 23, 5, pp. 479-496, (2014); Steinbauer, Manuel Jonas, Accelerated increase in plant species richness on …		Nature Research						20411723			36333301	English	Article	Final	All Open Access; Gold Open Access; Green Accepted Open Access; Green Final Open Access; Green Open Access	Scopus	2-s2.0-85141485939
C., Xia, Changying; Y., Huang, Yunfeng; Y., Qi, Yaodong; X., Yang, Xudong; T., Xue, Tiantian; R., Hu, Renchuan; H., Deng, Hongping; R.W., Bussmann, Rainer W.; S., Yu, Shengxiang	Xia, Changying (57210847473); Huang, Yunfeng (56456782600); Qi, Yaodong (37004000100); Yang, Xudong (57219599292); Xue, Tiantian (57218251894); Hu, Renchuan (55744597400); Deng, Hongping (35321110300); Bussmann, Rainer W. (6603001909); Yu, Shengxiang (23399062400)	57210847473; 56456782600; 37004000100; 57219599292; 57218251894; 55744597400; 35321110300; 6603001909; 23399062400	Developing long-term conservation priority planning for medicinal plants in China by combining conservation status with diversity hotspot analyses and climate change prediction	2022	BMC Biology	20	1	89			0	30	10.1186/s12915-022-01285-4	https://www.scopus.com/inward/record.uri?eid=2-s2.0-85128684451&doi=10.1186%2Fs12915-022-01285-4&partnerID=40&md5=daeb9015809474c9f62a60bb2b6a56a1	Institute of Botany, Chinese Academy of Sciences, Beijing, China; University of Chinese Academy of Sciences, Beijing, China; Southwest University, Chongqing, China; Guangxi Key Laboratory of Traditional Chinese Medicine Quality Standards, Nanning, China; Guangxi Institute of Chinese Medicine and Pharmaceutical Science, Nanning, China; Institute of Medicinal Plant Development, Chinese Academy of M…	Xia, Changying, Institute of Botany, Chinese Academy of Sciences, Beijing, China, University of Chinese Academy of Sciences, Beijing, China, School of Life Sciences, Southwest University, Chongqing, China; Huang, Yunfeng, Guangxi Key Laboratory of Traditional Chinese Medicine Quality Standards, Nanning, China, Guangxi Institute of Chinese Medicine and Pharmaceutical Science, Nanning, China; Qi, Y…	Background: Medicinal plants have always played an important role in the history of human health. However, the populations and sustainable use of medicinal plants have been severely affected by human activities and climate change. Little is known about the current conservation status and distribution pattern of medicinal plants. In this study, based on accurate geographical distribution informati…	Climate Change; Conservation Effectiveness; Distribution Pattern; Diversity Hotspots; Medicinal Plants; Suitable Habitat Areas; Article; China; Climate Change; Comparative Effectiveness; Geographic Distribution; Grid Cell; Habitat; Human; Human Cell; Medicinal Plant; Mountain; Nonhuman; Prediction	article; China; climate change; comparative effectiveness; geographic distribution; grid cell; habitat; human; human cell; medicinal plant; mountain; nonhuman; prediction			Kong, Jinming, Recent advances in traditional plant drugs and orchids, Acta Pharmacologica Sinica, 24, 1, pp. 7-21, (2003); Chi, Xiulian, Threatened medicinal plants in China: Distributions and conservation priorities, Biological Conservation, 210, pp. 89-95, (2017); Internet J Pharmacol, (2008); Kadioglu, Onat, Evaluating ancient Egyptian prescriptions today: Anti-inflammatory activity of Ziziph…		BioMed Central Ltd						17417007			35449002	English	Article	Final	All Open Access; Gold Open Access; Green Final Open Access; Green Open Access	Scopus	2-s2.0-85128684451
G.P., Nabhan, Gary Paul; P., Colunga-GarcíaMarín, Patricia; D., Zizumbo-Villarreal, Daniel	Nabhan, Gary Paul (6603822837); Colunga-GarcíaMarín, Patricia (56049527000); Zizumbo-Villarreal, Daniel (6603306375)	6603822837; 56049527000; 6603306375	Comparing Wild and Cultivated Food Plant Richness Between the Arid American and the Mesoamerican Centers of Diversity, as Means to Advance Indigenous Food Sovereignty in the Face of Climate Change	2022	Frontiers in Sustainable Food Systems	6		840619			0	9	10.3389/fsufs.2022.840619	https://www.scopus.com/inward/record.uri?eid=2-s2.0-85133598911&doi=10.3389%2Ffsufs.2022.840619&partnerID=40&md5=9b20fcf106b291730c19ad7299af2ee7	The University of Arizona, Tucson, United States	Nabhan, Gary Paul, The University of Arizona, Tucson, United States; Colunga-GarcíaMarín, Patricia, ; Zizumbo-Villarreal, Daniel,	Climate change is aggravating agricultural crop failures, and the paucity of wild food harvests for Indigenous desert dwellers in Mexico and the U.S. This food production crisis challenges ongoing efforts by Indigenous communities in obtaining greater food security, prompting them to reconsider the value of traditional Indigenous food systems in both Mesoamerica and Arid America, two adjacent cen…	Arid America; Centers Of Biocultural Diversity; Climate Change; Desert Agriculture; Diabetes; Indigenous Food Sovereignty; Mesoamerica; Traditional Food Systems				Leisa Revista De Agroecologia, (2009); Appendini, Kirsten, Agricultural policy, climate change and food security in Mexico, Food Policy, 19, 2, pp. 149-164, (1994); Central Desert of Baja California Demography and Ecology, (1959); Austin, Daniel Frank, Fox-tail millets (Setaria: Poaceae) - Abandoned food in two hemispheres, Economic Botany, 60, 2, pp. 143-158, (2006); Taxonom, (2002); Tropical De…		Frontiers Media S.A.						2571581X				English	Article	Final	All Open Access; Gold Open Access; Green Accepted Open Access; Green Open Access	Scopus	2-s2.0-85133598911
B.M.A., Al-Munqedhi, Bander M.A.; M.A.R.M., El-Sheikh, Mohamed Abd Rouf Mousa; A.H., Alfarhan, Ahmed H.; A.M.A., Alkahtani, Abdullah Misfer A.; I.A., Arif, I. A.; R., Rajagopal, Rajakrishnan; S.T., Alharthi, Sauod T.	Al-Munqedhi, Bander M.A. (57219181451); El-Sheikh, Mohamed Abd Rouf Mousa (8429327500); Alfarhan, Ahmed H. (6507800380); Alkahtani, Abdullah Misfer A. (57211238481); Arif, I. A. (6603613304); Rajagopal, Rajakrishnan (59483352700); Alharthi, Sauod T. (59052270400)	57219181451; 8429327500; 6507800380; 57211238481; 6603613304; 59483352700; 59052270400	Climate change and hydrological regime in arid lands: Impacts of dams on the plant diversity, vegetation structure and soil in Saudi Arabia	2022	Saudi Journal of Biological Sciences	29	5		3194	3206	0	15	10.1016/j.sjbs.2022.01.043	https://www.scopus.com/inward/record.uri?eid=2-s2.0-85124198827&doi=10.1016%2Fj.sjbs.2022.01.043&partnerID=40&md5=51868b6d1c59fd1b76fb37b660d5611c	College of Sciences, Riyadh, Saudi Arabia	Al-Munqedhi, Bander M.A., Department of Botany and Microbiology, College of Sciences, Riyadh, Saudi Arabia; El-Sheikh, Mohamed Abd Rouf Mousa, Department of Botany and Microbiology, College of Sciences, Riyadh, Saudi Arabia; Alfarhan, Ahmed H., Department of Botany and Microbiology, College of Sciences, Riyadh, Saudi Arabia; Alkahtani, Abdullah Misfer A., Department of Botany and Microbiology, Co…	As the direct effects of climate change on the hydrological regime, Saudi Arabia has constructed more than 522 dams of various capacities as part of economic and environmental development. The study aims to assess the impact of dams on plant diversity, vegetation structure and soil in Saudi Arabia. Thirty-five stands were selected from the dams of different sizes of Saudi Arabia. Vegetation sampl…	Climate Change; Downstream; Flooding; Plant Associations; Riparian Vegetation				International Journal of Botany, (2005); Abdel-Khalik, Kadry Nabeh, Floristic composition and vegetation: Environmental relationships of Wadi Fatimah, Mecca, Saudi Arabia, Arid Land Research and Management, 31, 3, pp. 316-334, (2017); Abu-Allaban, Mahmoud M., Water scarcity impact of climate change in semi-arid regions: a case study in Mujib basin, Jordan, Arabian Journal of Geosciences, 8, 2, pp…		Elsevier B.V.						1319562X				English	Article	Final	All Open Access; Green Final Open Access; Green Open Access; Hybrid Gold Open Access	Scopus	2-s2.0-85124198827
L., Bai, Lan; Z., Wang, Zhaohua; Y., Lu, Yitong; J., Tian, Jialing; Y., Peng, Yu	Bai, Lan (57207828198); Wang, Zhaohua (57257919300); Lu, Yitong (57221488885); Tian, Jialing (57219088524); Peng, Yu (56415411800)	57207828198; 57257919300; 57221488885; 57219088524; 56415411800	Monthly rather than annual climate variation determines plant diversity change in four temperate grassland nature reserves	2022	Environmental Science and Pollution Research	29	7		10357	10365	0	5	10.1007/s11356-021-16473-y	https://www.scopus.com/inward/record.uri?eid=2-s2.0-85114895721&doi=10.1007%2Fs11356-021-16473-y&partnerID=40&md5=e2f4a4583b0ac7156ba05292a68d4a2c	Minzu University of China, Beijing, China	Bai, Lan, College of Life and Environmental Sciences, Minzu University of China, Beijing, China; Wang, Zhaohua, College of Life and Environmental Sciences, Minzu University of China, Beijing, China; Lu, Yitong, College of Life and Environmental Sciences, Minzu University of China, Beijing, China; Tian, Jialing, College of Life and Environmental Sciences, Minzu University of China, Beijing, China;…	Plant diversity is changing in the world; climate variation at annual scale is believed to drive these changes; however, the effects of climate variation at month scale are still unknown. Anxi, West Ordos, Xilingol, and Tumuji grassland nature reserves, located in northern China, have been well protected from human disturbance, are ideal areas to identify the drive forces for plant diversity chan…	Climate Change; Grasslands; Nature Reserves; Plant Diversity; Remote Sensing; Temporal-spatial Changes; Annual Variation; Climate Variation; Grassland; Landsat; Nature Reserve; Satellite Imagery; Species Diversity; China; Nei Monggol; Ordos; Xilingol; Climate Change; Ecosystem; Human; Plant; Temperature; Climate Change; Ecosystem; Grassland; Humans; Plants; Temperature	annual variation; climate variation; grassland; Landsat; nature reserve; satellite imagery; species diversity; China; Nei Monggol; Ordos; Xilingol; climate change; ecosystem; human; plant; temperature; Climate Change; Ecosystem; Grassland; Humans; Plants; Temperature			Ackerly, David D., The geography of climate change: Implications for conservation biogeography, Diversity and Distributions, 16, 3, pp. 476-487, (2010); Badgley, Catherine E., Biodiversity and Topographic Complexity: Modern and Geohistorical Perspectives, Trends in Ecology and Evolution, 32, 3, pp. 211-226, (2017); Baldeck, Claire A., Soil resources and topography shape local tree community struc…		Springer Science and Business Media Deutschland GmbH						09441344; 16147499		ESPLE	34523091	English	Article	Final		Scopus	2-s2.0-85114895721
M., Renny, Mauricio; M.C., Acosta, Mariá Cristina; A.N., Sérsic, Alicia N.	Renny, Mauricio (57340586800); Acosta, Mariá Cristina (26660314200); Sérsic, Alicia N. (6602719907)	57340586800; 26660314200; 6602719907	Ancient climate changes and Andes uplift, rather than Last Glacial Maximum, affected distribution and genetic diversity patterns of the southernmost mycoheterotrophic plant Arachnitis uniflora Phil. (Corsiaceae)	2022	Global and Planetary Change	208		103701			0	5	10.1016/j.gloplacha.2021.103701	https://www.scopus.com/inward/record.uri?eid=2-s2.0-85119170609&doi=10.1016%2Fj.gloplacha.2021.103701&partnerID=40&md5=fd3772ce1551677e37e81ce436a28956	Instituto Multidisciplinario de Biología Vegetal, Cordoba, Argentina; Universidad Nacional de Córdoba, Cordoba, Argentina	Renny, Mauricio, Edificio de Investigaciones Biológicas y Tecnológicas, Instituto Multidisciplinario de Biología Vegetal, Cordoba, Argentina; Acosta, Mariá Cristina, Edificio de Investigaciones Biológicas y Tecnológicas, Instituto Multidisciplinario de Biología Vegetal, Cordoba, Argentina, Facultad de Ciencias Exactas, Universidad Nacional de Córdoba, Cordoba, Argentina; Sérsic, Alicia N., Edific…	Arachnitis uniflora (Corsiaceae) is a mycoheterotrophic plant native to South America that grows in tropical semi-humid forests of Peru and Bolivia, in the temperate Andean-Patagonian forests of Argentina and Chile, and in the moorlands of Malvinas/Falkland Islands. This widely distributed and disjunct species offers the opportunity to explore the dynamics of evolutionary processes using phylogeo…	Andean Uplift; Andean–patagonian Forest; Arachnitis Uniflora; Genetic Diversity; Great Patagonian Glaciation; Mycoheterotrophy; Climate Change; Expansion; Forestry; Glacial Geology; Plants (botany); Population Distribution; Population Statistics; Rna; Andean Uplift; Andean–patagonian Forest; Arachniti Uniflora; Evolutionary History; Genetics Diversities; Great Patagonian Glaciation; Late Miocene;…	Climate change; Expansion; Forestry; Glacial geology; Plants (botany); Population distribution; Population statistics; RNA; Andean uplift; Andean–patagonian forest; Arachniti uniflora; Evolutionary history; Genetics diversities; Great patagonian glaciation; Late Miocene; Mycoheterotrophy; Pleistocene; Spatio-temporal; Biodiversity; climate change; dicotyledon; evolutionary biology; genetic variat…			Acosta, Mariá Cristina, Retracing the evolutionary history of Nothofagus in its geo-climatic context: New developments in the emerging field of phylogeology, Geobiology, 12, 6, pp. 497-510, (2014); Allouche, Omri, Assessing the accuracy of species distribution models: Prevalence, kappa and the true skill statistic (TSS), Journal of Applied Ecology, 43, 6, pp. 1223-1232, (2006); Ammann, Caspar M.,…		Elsevier B.V.						9218181		GPCHE		English	Article	Final		Scopus	2-s2.0-85119170609
X., Yang, Xudong; B., Liu, Bo; R.W., Bussmann, Rainer W.; X., Guan, Xiao; W., Xu, Weibin; T., Xue, Tiantian; C., Xia, Changying; J., Li, Jin; H., Jiang, Hong; L., Wu, Lei	Yang, Xudong (57219599292); Liu, Bo (55653484400); Bussmann, Rainer W. (6603001909); Guan, Xiao (57198504243); Xu, Weibin (35738285900); Xue, Tiantian (57218251894); Xia, Changying (57210847473); Li, Jin (56834755600); Jiang, Hong (59041310500); Wu, Lei (55714337200)	57219599292; 55653484400; 6603001909; 57198504243; 35738285900; 57218251894; 57210847473; 56834755600; 59041310500; 55714337200	Integrated plant diversity hotspots and long-term stable conservation strategies in the unique karst area of southern China under global climate change	2021	Forest Ecology and Management	498		119540			0	29	10.1016/j.foreco.2021.119540	https://www.scopus.com/inward/record.uri?eid=2-s2.0-85111295985&doi=10.1016%2Fj.foreco.2021.119540&partnerID=40&md5=3238e6ac46154c6d153a0ada67d7ca60	Institute of Botany, Chinese Academy of Sciences, Beijing, China; University of Chinese Academy of Sciences, Beijing, China; Minzu University of China, Beijing, China; The Botanical Institute, Ilia State University, Tbilisi, Georgia; Chinese Research Academy of Environmental Sciences, Beijing, China; Guangxi Institute of Botany, Chinese Academy of Sciences, Guilin, China; Southwest University, Ch…	Yang, Xudong, Institute of Botany, Chinese Academy of Sciences, Beijing, China, University of Chinese Academy of Sciences, Beijing, China; Liu, Bo, College of Life and Environmental Sciences, Minzu University of China, Beijing, China; Bussmann, Rainer W., Department of Ethnobotany, The Botanical Institute, Ilia State University, Tbilisi, Georgia; Guan, Xiao, Biodiversity Research Center, Chinese …	The Karst Areas in Southern China are known for their abundant plant diversity and high endemism, but confronted with unprecedented challenges in biodiversity conservation. To identify hotspots and evaluate conservation effectiveness and gaps of the areas we built an occurrence database containing 16,073 species with 344,179 distribution points. We identified plant diversity hotspots by employing…	Conservation Gaps; Conservation Priority; Karst Area; Narrow-ranged Species; Spatial Phylogenetics; Species Richness; Biodiversity; Cells; Climate Change; Cytology; Ecosystems; Forestry; Landforms; Population Distribution; Conservation Effectiveness; Conservation Gap; Conservation Priorities; Hot Spot; Karst Areas; Narrow-ranged Species; Nature Reserves; Plant Diversity; Spatial Phylogenetic; Spe…	Biodiversity; Cells; Climate change; Cytology; Ecosystems; Forestry; Landforms; Population distribution; Conservation effectiveness; Conservation gap; Conservation priorities; Hot spot; Karst areas; Narrow-ranged species; Nature reserves; Plant diversity; Spatial phylogenetic; Species richness; Conservation; climate change; conservation management; conservation planning; conservation status; dete…			Anderson, Sydney, Area and endemism, Quarterly Review of Biology, 69, 4, pp. 451-471, (1994); Araújo, Miguel B., Standards for distribution models in biodiversity assessments, Science Advances, 5, 1, (2019); Araújo, Miguel B., Quaternary climate changes explain diversity among reptiles and amphibians, Ecography, 31, 1, pp. 8-15, (2008); Bellard, Céline, Impacts of climate change on the future of …		Elsevier B.V.						3781127		FECMD		English	Article	Final		Scopus	2-s2.0-85111295985
A., Blaus, Ansis; T., Reitalu, Triin; A., Poska, Anneli; J., Vassiljev, Jüri; S., Veski, Siim	Blaus, Ansis (57202377865); Reitalu, Triin (23486601900); Poska, Anneli (6603865968); Vassiljev, Jüri (56055965500); Veski, Siim (16318108200)	57202377865; 23486601900; 6603865968; 56055965500; 16318108200	Mire plant diversity change over the last 10,000 years: Importance of isostatic land uplift, climate and local conditions	2021	Journal of Ecology	109	10		3634	3651	0	6	10.1111/1365-2745.13742	https://www.scopus.com/inward/record.uri?eid=2-s2.0-85111467360&doi=10.1111%2F1365-2745.13742&partnerID=40&md5=7906b68a9703c031bf7066b3a8fce405	Tallinna Tehnikaülikool, Tallinn, Estonia; Florida Institute of Technology, Melbourne, United States; Ökoloogia ja Maateaduste Instituut, Tartu, Estonia	Blaus, Ansis, Department of Geology, Tallinna Tehnikaülikool, Tallinn, Estonia, Institute for Global Ecology, Florida Institute of Technology, Melbourne, United States; Reitalu, Triin, Department of Geology, Tallinna Tehnikaülikool, Tallinn, Estonia, Ökoloogia ja Maateaduste Instituut, Tartu, Estonia; Poska, Anneli, Department of Geology, Tallinna Tehnikaülikool, Tallinn, Estonia; Vassiljev, Jüri…	Mires or peatlands host unique biodiversity and provide many valuable ecosystem services. Mires often undergo different development phases during their evolution. Two mire phases that have clearly divergent hydrological regimes and characteristic biotas are minerotrophic fen and ombrotrophic bog. Open mires can be overgrown by trees and develop into peatland forests. Mire development trajectories…	Baltic Region; Biodiversity; Ellenberg Indicator Values; Fen–bog Succession; Minerotrophic Fens; Ombrotrophic Bogs; Palynology; Phylogenetic Diversity; Biodiversity; Climate Change; Coexistence; Conservation Planning; Holocene; Mire; Estonia; Saaremaa; Indicator Indicator	biodiversity; climate change; coexistence; conservation planning; Holocene; mire; Estonia; Saaremaa; Indicator indicator			Relative Pollen Productivity and Pollen Representation of North European Trees and Correction Factors for Tree Pollen Spectra, (1970); Beadle, Jeannie M., Biodiversity and ecosystem functioning in natural bog pools and those created by rewetting schemes, Wiley Interdisciplinary Reviews: Water, 2, 2, pp. 65-84, (2015); J R Stat Soc B, (1995); Bennett, K. D., Determination of the number of zones in…		John Wiley and Sons Inc						00220477; 13652745		JECOA		English	Article	Final	All Open Access; Bronze Open Access	Scopus	2-s2.0-85111467360
J., Lu, Jingzhao; H., Lu, Hongwei; M.L., Brusseau, Mark L.; L., He, Li; A., Gorlier, Alessandra; T., Yao, Tianci; P., Tian, Peipei; S., Feng, Sansan; Q., Yu, Qing; Q., Nie, Qianwen	Lu, Jingzhao (57199239134); Lu, Hongwei (25937323000); Brusseau, Mark L. (7103123433); He, Li (35210184500); Gorlier, Alessandra (26537456900); Yao, Tianci (57143540800); Tian, Peipei (57194322893); Feng, Sansan (57211081305); Yu, Qing (57212683268); Nie, Qianwen (57216177979)	57199239134; 25937323000; 7103123433; 35210184500; 26537456900; 57143540800; 57194322893; 57211081305; 57212683268; 57216177979	Interaction of climate change, potentially toxic elements (PTEs), and topography on plant diversity and ecosystem functions in a high-altitude mountainous region of the Tibetan Plateau	2021	Chemosphere	275		130099			0	12	10.1016/j.chemosphere.2021.130099	https://www.scopus.com/inward/record.uri?eid=2-s2.0-85101769266&doi=10.1016%2Fj.chemosphere.2021.130099&partnerID=40&md5=006476166583ec4c09367df2cc06d0df	Chinese Academy of Sciences, Beijing, China; Hebei Agricultural University, Baoding, China; North China Electric Power University, Beijing, China; Tianjin University, Tianjin, China; The University of Arizona, Tucson, United States; College of Science, Tucson, United States; The University of Arizona, Tucson, United States	Lu, Jingzhao, Key Laboratory of Water Cycle and Related Land Surface Processes, Chinese Academy of Sciences, Beijing, China, College of Science and Technology, Hebei Agricultural University, Baoding, China, Department of Environmental Sciences, The University of Arizona, Tucson, United States; Lu, Hongwei, Key Laboratory of Water Cycle and Related Land Surface Processes, Chinese Academy of Scienc…	Potentially toxic elements (PTEs) generated from mining activities have affected ecological diversity and ecosystem functions around the world. Accurately assessing the long-term effects of PTEs is critical to classifying recoverable areas and proposing management strategies. Mining activities that shape geographical patterns of biodiversity in individual regions are increasingly understood, but …	Altitude Gradients; Biodiversity; Ecosystem Functions; Potentially Toxic Elements (ptes); Tibetan Plateau; Arid Regions; Biodiversity; Ecosystems; Landforms; Topography; Biodiversity And Ecosystem Functions; Changing Environment; Ecological Diversity; Geographical Patterns; Management Strategies; Northeastern Tibetan Plateaux; Potentially Toxic Elements; Soil Characteristics; Climate Change; Biod…	Arid regions; Biodiversity; Ecosystems; Landforms; Topography; Biodiversity and ecosystem functions; Changing environment; Ecological diversity; Geographical patterns; Management strategies; Northeastern tibetan plateaux; Potentially toxic elements; Soil characteristics; Climate change; biodiversity; climate change; ecosystem function; grassland; heterogeneity; plant community; species diversity;…			Anacker, Brian L., Origins and consequences of serpentine endemism in the california flora, Evolution, 65, 2, pp. 365-376, (2011); Anderson, Alex S., Current Analogues of Future Climate Indicate the Likely Response of a Sensitive Montane Tropical Avifauna to a Warming World, PLOS ONE, 8, 7, (2013); Vittori Antisari, Livia, Translocation of potential toxic elements from soil to black cabbage (Bras…		Elsevier Ltd						00456535; 18791298		CMSHA	33667772	English	Article	Final		Scopus	2-s2.0-85101769266
G.M., Inague, Gabriel M.; V.P., Zwiener, Victor P.; M.C.M., Marques, Márcia Cristina Mendes	Inague, Gabriel M. (57221617158); Zwiener, Victor P. (54791836100); Marques, Márcia Cristina Mendes (14826751200)	57221617158; 54791836100; 14826751200	Climate change threatens the woody plant taxonomic and functional diversities of the Restinga vegetation in Brazil	2021	Perspectives in Ecology and Conservation	19	1		53	60	0	35	10.1016/j.pecon.2020.12.006	https://www.scopus.com/inward/record.uri?eid=2-s2.0-85099613034&doi=10.1016%2Fj.pecon.2020.12.006&partnerID=40&md5=afd002cd9146a53c5888537904f40087	Universidade Federal do Parana, Curitiba, Brazil; Universidade Federal do Parana, Curitiba, Brazil	Inague, Gabriel M., Department of Botany, Universidade Federal do Parana, Curitiba, Brazil; Zwiener, Victor P., Departamento de Biodiversidade, Universidade Federal do Parana, Curitiba, Brazil; Marques, Márcia Cristina Mendes, Department of Botany, Universidade Federal do Parana, Curitiba, Brazil	Climate change may impose extreme conditions which potentially affect species’ distributions, leading to spatio-temporal variation in biodiversity and ecosystem services patterns. Here we compared current climate conditions to future climate scenarios projected to 2050 to assess potential changes in the spatio-temporal patterns of the taxonomic and functional diversities of the woody species of t…	Atlantic Forest; Beta Diversity Heterogenization; Coastal Vegetation; Diversity Partitioning; Ecological Niche Modeling; Functional Diversity Homogenization				Asner, Gregory P., Combined effects of climate and land-use change on the future of humid tropical forests, Conservation Letters, 3, 6, pp. 395-403, (2010); Baselga, Andrés, Partitioning the turnover and nestedness components of beta diversity, Global Ecology and Biogeography, 19, 1, pp. 134-143, (2010); Baselga, Andrés, Betapart: An R package for the study of beta diversity, Methods in Ecology a…		Associacao Brasileira de Ciencia Ecologica e Conservacao						25300644				English	Article	Final	All Open Access; Gold Open Access	Scopus	2-s2.0-85099613034
K., Kougioumoutzis, Konstantinos; I.P., Kokkoris, Ioannis P.; M., Panitsa, Maria; P., Trigas, Panayiotis; A., Strid, Arne; P., Dimopoulos, Panayotis	Kougioumoutzis, Konstantinos (55014642500); Kokkoris, Ioannis P. (57193802017); Panitsa, Maria (6506787287); Trigas, Panayiotis (23974769300); Strid, Arne (7004163241); Dimopoulos, Panayotis (7006307181)	55014642500; 57193802017; 6506787287; 23974769300; 7004163241; 7006307181	Plant diversity patterns and conservation implications under climate-change scenarios in the mediterranean: The case of crete (Aegean, Greece)	2020	Diversity	12	7	270			0	57	10.3390/d12070270	https://www.scopus.com/inward/record.uri?eid=2-s2.0-85088528315&doi=10.3390%2Fd12070270&partnerID=40&md5=02313f6fb93f51da0ec26e246373103e	National and Kapodistrian University of Athens, Athens, Greece; University of Patras, Rio, Greece; Agricultural University of Athens, Athens, Greece	Kougioumoutzis, Konstantinos, Department of Ecology and Systematics, National and Kapodistrian University of Athens, Athens, Greece, Department of Biology, University of Patras, Rio, Greece, Department of Crop Sciences, Agricultural University of Athens, Athens, Greece; Kokkoris, Ioannis P., Department of Biology, University of Patras, Rio, Greece; Panitsa, Maria, Department of Biology, Universit…	Climate change poses a great challenge for biodiversity conservation. Several studies exist regarding climate change's impacts on European plants, yet none has investigated how climate change will affect the extinction risk of the entire endemic flora of an island biodiversity hotspot, with intense human disturbance. Our aim is to assess climate change's impacts on the biodiversity patterns of th…	Continental Island; Endemics; Environmental Management; Extinction Risk; Mediterranean Flora; Natura 2000; Species Distribution Modelling; Biodiversity; Climate Change; Climate Effect; Ecosystem Service; Endemic Species; Flora; Macroecology; Plant; Protected Area; Species Conservation; Aegean Islands; Crete [greece]; Greece; Mediterranean Region	biodiversity; climate change; climate effect; ecosystem service; endemic species; flora; macroecology; plant; protected area; species conservation; Aegean Islands; Crete [Greece]; Greece; Mediterranean Region			Zalasiewicz, Jan A., When did the Anthropocene begin? A mid-twentieth century boundary level is stratigraphically optimal, Quaternary International, 383, pp. 196-203, (2015); Urban, Mark C., Improving the forecast for biodiversity under climate change, Science, 353, 6304, (2016); Warren, Rachel F., Quantifying the benefit of early climate change mitigation in avoiding biodiversity loss, Nature Cl…		MDPI AG rasetti@mdpi.com Postfach Basel CH-4005						14242818				English	Article	Final	All Open Access; Gold Open Access; Green Accepted Open Access; Green Open Access	Scopus	2-s2.0-85088528315
I., Dullinger, Iwona; A., Gattringer, Andreas; J., Wessely, Johannes; D., Moser, Dietmar; C., Plutzar, Christoph; W., Willner, Wolfgang; C., Egger, Claudine; V., Gaube, Veronika; H., Haberl, Helmut; A., Mayer, Andreas	Dullinger, Iwona (57190885355); Gattringer, Andreas (46961056200); Wessely, Johannes (57188830081); Moser, Dietmar (7101785522); Plutzar, Christoph (6506917545); Willner, Wolfgang (57195562590); Egger, Claudine (57209571947); Gaube, Veronika (9747941800); Haberl, Helmut (7004619776); Mayer, Andreas (56155068400)	57190885355; 46961056200; 57188830081; 7101785522; 6506917545; 57195562590; 57209571947; 9747941800; 7004619776; 56155068400	A socio-ecological model for predicting impacts of land-use and climate change on regional plant diversity in the Austrian Alps	2020	Global Change Biology	26	4		2336	2352	0	34	10.1111/gcb.14977	https://www.scopus.com/inward/record.uri?eid=2-s2.0-85078805500&doi=10.1111%2Fgcb.14977&partnerID=40&md5=aa1ae9c94a8390686b7b4d7dcde98c2a	Universität Wien, Vienna, Austria; BOKU University, Vienna, Austria; Agricultural Research and Education Centre Raumberg-Gumpenstein, Irdning, Austria; Universität Wien, Vienna, Austria; BOKU University, Vienna, Austria	Dullinger, Iwona, Vegetation and Landscape Ecology, Universität Wien, Vienna, Austria; Gattringer, Andreas, Vegetation and Landscape Ecology, Universität Wien, Vienna, Austria; Wessely, Johannes, Vegetation and Landscape Ecology, Universität Wien, Vienna, Austria; Moser, Dietmar, Vegetation and Landscape Ecology, Universität Wien, Vienna, Austria; Plutzar, Christoph, Vegetation and Landscape Ecol…	Climate and land-use change jointly affect the future of biodiversity. Yet, biodiversity scenarios have so far concentrated on climatic effects because forecasts of land use are rarely available at appropriate spatial and thematic scales. Agent-based models (ABMs) represent a potentially powerful but little explored tool for establishing thematically and spatially fine-grained land-use scenarios.…	Agent-based Model; Biodiversity; Climate Change; Europe; Global Change; Land-use Change; Plant Diversity; Plant Species Distribution; Species Distribution Model; Anthropogenic Effect; Biodiversity; Climate Change; Climate Effect; Land Use Change; Plant Community; Population Distribution; Alps; Austria	anthropogenic effect; biodiversity; climate change; climate effect; land use change; plant community; population distribution; Alps; Austria			Absar, Syeda Mariya, Extending the Shared Socioeconomic Pathways for sub-national impacts, adaptation, and vulnerability studies, Global Environmental Change, 33, pp. 83-96, (2015); Allouche, Omri, Assessing the accuracy of species distribution models: Prevalence, kappa and the true skill statistic (TSS), Journal of Applied Ecology, 43, 6, pp. 1223-1232, (2006); An, Li, Modeling human decisions i…		Blackwell Publishing Ltd						13541013; 13652486				English	Article	Final	All Open Access; Green Final Open Access; Green Open Access; Hybrid Gold Open Access	Scopus	2-s2.0-85078805500
F., Porro, Francesco; M., Tomaselli, Marcello; T., Abeli, Thomas; M., Gandini, Maurizia; M., Gualmini, Matteo; S., Orsenigo, Simone; A., Petraglia, Alessandro; G., Rossi, Graziano; M., Carbognani, Michele	Porro, Francesco (57193792094); Tomaselli, Marcello (7004813375); Abeli, Thomas (35193685400); Gandini, Maurizia (54881597900); Gualmini, Matteo (6503997205); Orsenigo, Simone (53881640500); Petraglia, Alessandro (12144266400); Rossi, Graziano (35079263400); Carbognani, Michele (55293653600)	57193792094; 7004813375; 35193685400; 54881597900; 6503997205; 53881640500; 12144266400; 35079263400; 55293653600	Could plant diversity metrics explain climate-driven vegetation changes on mountain summits of the GLORIA network?	2019	Biodiversity and Conservation	28	13		3575	3596	0	23	10.1007/s10531-019-01837-1	https://www.scopus.com/inward/record.uri?eid=2-s2.0-85071599207&doi=10.1007%2Fs10531-019-01837-1&partnerID=40&md5=e468cbea04ededa64a75a28874150c71	Università degli Studi di Pavia, Pavia, Italy; Università di Parma, Parma, Italy; Università degli Studi Roma Tre, Rome, Italy	Porro, Francesco, Department of Earth and Environmental Sciences, Università degli Studi di Pavia, Pavia, Italy; Tomaselli, Marcello, Department of Chemistry, Università di Parma, Parma, Italy; Abeli, Thomas, Department of Science, Università degli Studi Roma Tre, Rome, Italy; Gandini, Maurizia, Department of Earth and Environmental Sciences, Università degli Studi di Pavia, Pavia, Italy; Gualmin…	High-elevation habitats host a large number of plant species and are characterized by high biodiversity. The vegetation dynamics in these cold adapted ecosystems are difficult to predict, being affected by global warming, especially in the last decades. With the aim to promote a better understanding of climate-driven changes of alpine vegetation, we investigated the variation in species richness,…	Biodiversity Loss; Biotic Homogenization; Gloria; Hill Numbers; Plant Functional Types; Vegetation Dynamics; Alpine Environment; Biotic Factor; Climate Effect; Functional Role; Homogeneity; Mountain Environment; Rare Species; Species Richness; Vegetation Dynamics; Apennines; Italy	alpine environment; biotic factor; climate effect; functional role; homogeneity; mountain environment; rare species; species richness; vegetation dynamics; Apennines; Italy			Abeli, Thomas, Effect of the extreme summer heat waves on isolated populations of two orophitic plants in the north Apennines (Italy), Nordic Journal of Botany, 30, 1, pp. 109-115, (2012); Abeli, Thomas, Response of alpine plant flower production to temperature and snow cover fluctuation at the species range boundary, Plant Ecology, 213, 1, pp. 1-13, (2012); Alexander, Jake M., Lags in the respon…		Springer Netherlands rbk@louisiana.edu						09603115; 15729710		BONSE		English	Article	Final		Scopus	2-s2.0-85071599207
D.J., McDonald, David J.; G.F., Midgley, Guy F.; L.W., Powrie, Leslie Ward	McDonald, David J. (7201822791); Midgley, Guy F. (7006003164); Powrie, Leslie Ward (6602739628)	7201822791; 7006003164; 6602739628	Scenarios of plant diversity in South African mountain ranges in relation to climate change	2019					261	266	0	2		https://www.scopus.com/inward/record.uri?eid=2-s2.0-85118653827&partnerID=40&md5=a2daedbe77a6005ef502239da5b3ae28		McDonald, David J., ; Midgley, Guy F., ; Powrie, Leslie Ward,	[No abstract available]					Palaeoecology of Africa, (1967); Vegetation of Southern Africa, (1997); Acta Phytogeographica Suecica, (1964); Memoirs of the Botanical Survey of South Africa, (1963); Heathlands and Related Shrublands Descriptive Studies, (1979); Bothalia, (1978); Biogeography and Ecology of Southern Africa, (1978); Killick, D. J.B., Further data on the climate of the alpine vegetation belt of eastern Lesotho ( …		Taylor and Francis							9781000698299; 9780429342585			English	Book chapter	Final		Scopus	2-s2.0-85118653827
A.J., Suggitt, Andrew J.; D.G., Lister, Duncan G.; C.D., Thomas, Chris D.	Suggitt, Andrew J. (36678175000); Lister, Duncan G. (57210843912); Thomas, Chris D. (7404413845)	36678175000; 57210843912; 7404413845	Widespread Effects of Climate Change on Local Plant Diversity	2019	Current Biology	29	17		2905	291100	0	30	10.1016/j.cub.2019.06.079	https://www.scopus.com/inward/record.uri?eid=2-s2.0-85071669960&doi=10.1016%2Fj.cub.2019.06.079&partnerID=40&md5=cefd41b1825abd44183cb01309e391f1	University of York, York, United Kingdom; University of Northumbria, Newcastle, United Kingdom; University of York, York, United Kingdom	Suggitt, Andrew J., Department of Biology, University of York, York, United Kingdom, Department of Environmental Sciences, University of Northumbria, Newcastle, United Kingdom; Lister, Duncan G., Department of Biology, University of York, York, United Kingdom; Thomas, Chris D., Department of Biology, University of York, York, United Kingdom, Department of Biology, University of York, York, United…	Human activity has sent many measures of biodiversity into long-term decline, and there are suggestions that the sheer scale of this impact is sufficient to consider the modern era as a geological epoch of its own, known as “The Anthropocene” [1]. However, recent meta-analyses show that local alpha diversity is often stable or slightly increasing [2–4]. Here, we show that the local alpha diversit…	Biogeography; Environmental Change; Global Warming; Rain; Biodiversity; Climate Change; Ecosystem; Geography; Plant; Biodiversity; Climate Change; Ecosystem; Geography; Plants; Rain	rain; biodiversity; climate change; ecosystem; geography; plant; Biodiversity; Climate Change; Ecosystem; Geography; Plants; Rain			Lewis, Simon L., Defining the Anthropocene, Nature, 519, 7542, pp. 171-180, (2015); Vellend, Mark, Global meta-analysis reveals no net change in local-scale plant biodiversity over time, Proceedings of the National Academy of Sciences of the United States of America, 110, 48, pp. 19456-19459, (2013); Dornelas, Maria A., Assemblage time series reveal biodiversity change but not systematic loss, Sc…		Cell Press subs@cell.com						18790445; 09609822		CUBLE	31422880	English	Article	Final	All Open Access; Green Accepted Open Access; Green Open Access; Hybrid Gold Open Access	Scopus	2-s2.0-85071669960
S., Belyazid, Salim; J.N., Phelan, Jennifer N.; B.J., Nihlgård, Bengt J.; H.U., Sverdrup, Harald Ulrik; C.T., DRISCOLL, CHARLES T.; I.J., Fernandez, Ivan J.; J., Aherne, Julian; L.M., Teeling-Adams, Leslie M.; S.W., Bailey, Scott W.; M.P., Arsenault, Matthew P.	Belyazid, Salim (9734198400); Phelan, Jennifer N. (24067684000); Nihlgård, Bengt J. (6603624316); Sverdrup, Harald Ulrik (55909456800); DRISCOLL, CHARLES T. (7202046491); Fernandez, Ivan J. (7101615738); Aherne, Julian (6701403512); Teeling-Adams, Leslie M. (57208534865); Bailey, Scott W. (7401729813); Arsenault, Matthew P. (7003970136)	9734198400; 24067684000; 6603624316; 55909456800; 7202046491; 7101615738; 6701403512; 57208534865; 7401729813; 7003970136	Assessing the Effects of Climate Change and Air Pollution on Soil Properties and Plant Diversity in Northeastern U.S. Hardwood Forests: Model Setup and Evaluation	2019	Water, Air, and Soil Pollution	230	5	106			0	5	10.1007/s11270-019-4145-6	https://www.scopus.com/inward/record.uri?eid=2-s2.0-85065027391&doi=10.1007%2Fs11270-019-4145-6&partnerID=40&md5=83b161cda5a06e8ce2f71bacc2233861	Stockholms universitet, Stockholm, Sweden; RTI International, Research Triangle Park, United States; Lunds Universitet, Lund, Sweden; Haskoli Islands, Reykjavik, Iceland; College of Engineering and Computer Science, Syracuse, United States; University of Maine, Orono, United States; Trent University, Peterborough, Canada; Great Bay Community College, Portsmouth, United States; USDA Forest Service…	Belyazid, Salim, Department of Physical Geography, Stockholms universitet, Stockholm, Sweden; Phelan, Jennifer N., RTI International, Research Triangle Park, United States; Nihlgård, Bengt J., Department of Biology, Lunds Universitet, Lund, Sweden; Sverdrup, Harald Ulrik, Department of Industrial Engineering, Haskoli Islands, Reykjavik, Iceland; DRISCOLL, CHARLES T., College of Engineering and Co…	The integrated forest ecosystem model ForSAFE-Veg was used to simulate soil processes and understory vegetation composition at three—sugar maple, beech, yellow birch—hardwood forest sites in the Northeastern United States (one at Hubbard Brook, NH, and two at Bear Brook, ME). Input data were pooled from a variety of sources and proved coherent and consistent. While the biogeochemical component Fo…	Bear Brook; Ecosystem Modeling; Forsafe-veg; Hubbard Brook; Plant Biodiversity; Vegetation Modeling; Nitrogen; Sulfur; Biodiversity; Biogeochemistry; Calibration; Climate Change; Ecosystems; Forestry; Hardwoods; Soil Moisture; Vegetation; Bear Brook; Ecosystem Model; Forsafe-veg; Hubbard; Vegetation Model; Climate Models; Nitrogen; Sulfur; Atmospheric Pollution; Biodiversity; Calibration; Climate…	Biodiversity; Biogeochemistry; Calibration; Climate change; Ecosystems; Forestry; Hardwoods; Soil moisture; Vegetation; Bear Brook; Ecosystem model; ForSAFE-Veg; Hubbard; Vegetation model; Climate models; nitrogen; sulfur; atmospheric pollution; biodiversity; calibration; climate change; community composition; ecosystem modeling; mixed forest; soil property; understory; vegetation; Acer saccharum…		nitrogen, 7727-37-9; sulfur, 13981-57-2, 7704-34-9	Aber, John D., Effects of land use, climate variation, and N deposition on N cycling and C storage in northern hardwood forests, Global Biogeochemical Cycles, 11, 4, pp. 639-648, (1997); Aber, John D., A generalized, lumped-parameter model of photosynthesis, evapotranspiration and net primary production in temperate and boreal forest ecosystems, Oecologia, 92, 4, pp. 463-474, (1992); Bioscience, …		Springer International Publishing						00496979; 15732932		WAPLA		English	Article	Final	All Open Access; Green Accepted Open Access; Green Open Access; Hybrid Gold Open Access	Scopus	2-s2.0-85065027391
F.P., Díaz, Francisca P.; C., Latorre, Claudio; G., Carrasco-Puga, Gabriela; J.R., Wood, Jamie R.; J.M., Wilmshurst, Janet M.; D.C., Soto, Daniela C.; T.L., Cole, Theresa L.; R.A., Gutiérrez, Rodrigo A.	Díaz, Francisca P. (57205852822); Latorre, Claudio (7005764439); Carrasco-Puga, Gabriela (57206787768); Wood, Jamie R. (7404354089); Wilmshurst, Janet M. (7004359599); Soto, Daniela C. (57201195097); Cole, Theresa L. (57188681062); Gutiérrez, Rodrigo A. (7201937337)	57205852822; 7005764439; 57206787768; 7404354089; 7004359599; 57201195097; 57188681062; 7201937337	Multiscale climate change impacts on plant diversity in the Atacama Desert	2019	Global Change Biology	25	5		1733	1745	0	60	10.1111/gcb.14583	https://www.scopus.com/inward/record.uri?eid=2-s2.0-85061986479&doi=10.1111%2Fgcb.14583&partnerID=40&md5=33882189f4aa52e1beccbc0e331b9efa	Pontificia Universidad Católica de Chile, Santiago, Chile; Instituto Milenio de Biología Integrativa, Santiago, Chile; Pontificia Universidad Católica de Chile, Santiago, Chile; Instituto de Ecología y Biodiversidad, Santiago, Chile; Manaaki Whenua – Landcare Research, Lincoln, New Zealand; The University of Auckland, Auckland, New Zealand; University of Otago, Dunedin, New Zealand	Díaz, Francisca P., Departamento de Genética Molecular y Microbiología, Pontificia Universidad Católica de Chile, Santiago, Chile, Instituto Milenio de Biología Integrativa, Santiago, Chile; Latorre, Claudio, Departamento de Ecología, Pontificia Universidad Católica de Chile, Santiago, Chile, Instituto de Ecología y Biodiversidad, Santiago, Chile; Carrasco-Puga, Gabriela, Departamento de Genética…	Comprehending ecological dynamics requires not only knowledge of modern communities but also detailed reconstructions of ecosystem history. Ancient DNA (aDNA) metabarcoding allows biodiversity responses to major climatic change to be explored at different spatial and temporal scales. We extracted aDNA preserved in fossil rodent middens to reconstruct late Quaternary vegetation dynamics in the hyp…	Ancient Dna; Atacama Desert; Biodiversity; Biogeography; Climate Change; Desert Plants; Elevational Gradients; Fossil Middens; Metabarcoding; Paleoecology; Dna, Ancient; Biodiversity; Biogeography; Climate Change; Climate Effect; Dna; Fossil; Midden; Paleoecology; Plant; Species Diversity; Atacama Desert; Chile; Rodentia; Ancient Dna; Classification; Desert Climate; Ecosystem; Genetics; Plant Dis…	biodiversity; biogeography; climate change; climate effect; DNA; fossil; midden; paleoecology; plant; species diversity; Atacama Desert; Chile; Rodentia; ancient DNA; classification; desert climate; ecosystem; genetics; plant dispersal; population dynamics; Biodiversity; Climate Change; Desert Climate; DNA, Ancient; Ecosystem; Fossils; Plant Dispersal; Plants; Population Dynamics	GENBANK: MH115328, MH115388	DNA, Ancient	Alexander, Jake M., Lags in the response of mountain plant communities to climate change, Global Change Biology, 24, 2, pp. 563-579, (2018); Alsos, Inger Greve, Sedimentary ancient DNA from Lake Skartjørna, Svalbard: Assessing the resilience of arctic flora to Holocene climate change, Holocene, 26, 4, pp. 627-642, (2016); EFFECTS OF ARIDITY ON PLANT DIVERSITY IN THE NORTHERN CHILEAN ANDES RESULTS…		Blackwell Publishing Ltd						13541013; 13652486			30706600	English	Article	Final		Scopus	2-s2.0-85061986479
Y., Liu, Yunpeng; X., Su, Xiangyan; N., Shrestha, Nawal; X., Xu, Xiaoting; S., Wang, Siyang; Y., Li, Yaoqi; Q., Wang, Qinggang; D.V., Sandanov, Denis Viktorovich; Z., Wang, Zhiheng	Liu, Yunpeng (57192875828); Su, Xiangyan (57192875948); Shrestha, Nawal (56080143300); Xu, Xiaoting (56510403900); Wang, Siyang (57193252450); Li, Yaoqi (57190886162); Wang, Qinggang (55672264400); Sandanov, Denis Viktorovich (23393830000); Wang, Zhiheng (9038234600)	57192875828; 57192875948; 56080143300; 56510403900; 57193252450; 57190886162; 55672264400; 23393830000; 9038234600	Effects of contemporary environment and Quaternary climate change on drylands plant diversity differ between growth forms	2019	Ecography	42	2		334	345	0	51	10.1111/ecog.03698	https://www.scopus.com/inward/record.uri?eid=2-s2.0-85052403110&doi=10.1111%2Fecog.03698&partnerID=40&md5=f06d98a7432a8bd9b502f9fa4326e939	Peking University, Beijing, China; Sichuan University, Chengdu, China; China Agricultural University, Beijing, China; Institute of General and Experimental Biology of the Siberian Branch of the RAS, Ulan-Ude, Russian Federation	Liu, Yunpeng, Institute of Ecology, Peking University, Beijing, China; Su, Xiangyan, Institute of Ecology, Peking University, Beijing, China; Shrestha, Nawal, Institute of Ecology, Peking University, Beijing, China; Xu, Xiaoting, Institute of Ecology, Peking University, Beijing, China, College of Life Sciences, Sichuan University, Chengdu, China; Wang, Siyang, Institute of Ecology, Peking Univers…	Previous studies on large-scale patterns in plant richness and underlying mechanisms have mostly focused on forests and mountains, while drylands covering most of the world's grasslands and deserts are more poorly investigated for lack of data. Here, we aim to 1) evaluate the plant richness patterns in Inner Asian drylands; 2) compare the relative importance of contemporary environment, historica…	Drylands; Herbaceous Diversity; Plant Richness Patterns; Climate Change; Climate Variation; Desert; Environmental Effect; Exploitation; Extinction Risk; Forest Ecosystem; Global Warming; Grassland; Growth Form; Herb; Heterogeneity; Human Activity; Last Glacial Maximum; Mountain Region; Precipitation (climatology); Quaternary; Seasonality; Species Diversity; Species Richness; Asia; Spermatophyta	climate change; climate variation; desert; environmental effect; exploitation; extinction risk; forest ecosystem; global warming; grassland; growth form; herb; heterogeneity; human activity; Last Glacial Maximum; mountain region; precipitation (climatology); Quaternary; seasonality; species diversity; species richness; Asia; Spermatophyta			de Albuquerque, Fábio Suzart, Environmental determinants of woody and herb plant species richness patterns in Great Britain, Ecoscience, 18, 4, pp. 394-401, (2011); Antonelli, Alexandre E., Tracing the impact of the Andean uplift on Neotropical plant evolution, Proceedings of the National Academy of Sciences of the United States of America, 106, 24, pp. 9749-9754, (2009); Araújo, Miguel B., Quate…		Blackwell Publishing Ltd						16000587; 09067590		ECOGE		English	Article	Final	All Open Access; Bronze Open Access	Scopus	2-s2.0-85052403110
L., Tang, Lili; R., Wang, Runxi; K.S., He, Kate S.; C., Shi, Cong; T., Yang, Tong; Y., Huang, Yaping; P., Zheng, Pufan; F., Shi, Fuchen	Tang, Lili (57207052345); Wang, Runxi (57195396742); He, Kate S. (24721471700); Shi, Cong (59864089800); Yang, Tong (57195418656); Huang, Yaping (57202860570); Zheng, Pufan (57211583586); Shi, Fuchen (55999698600)	57207052345; 57195396742; 24721471700; 59864089800; 57195418656; 57202860570; 57211583586; 55999698600	Throwing light on dark diversity of vascular plants in China: Predicting the distribution of dark and threatened species under global climate change	2019	PeerJ	2019	4	6731			0	11	10.7717/peerj.6731	https://www.scopus.com/inward/record.uri?eid=2-s2.0-85073382734&doi=10.7717%2Fpeerj.6731&partnerID=40&md5=f5606446b9148196555719e00f00ecfb	Nankai University, Tianjin, China; Murray State University, Murray, United States; Peking University, Beijing, China	Tang, Lili, College of Life Sciences, Nankai University, Tianjin, China; Wang, Runxi, College of Life Sciences, Nankai University, Tianjin, China; He, Kate S., Department of Biological Sciences, Murray State University, Murray, United States; Shi, Cong, School of Environment and Energy, Peking University, Beijing, China; Yang, Tong, College of Life Sciences, Nankai University, Tianjin, China; Hua…	Background: As global climate change accelerates, ecologists and conservationists are increasingly investigating changes in biodiversity and predicting species distribution based on species observed at sites, but rarely consider those plant species that could potentially inhabit but are absent from these areas (i.e., the dark diversity and its distribution). Here, we estimated the dark diversity …	Dark Diversity; Global Climate Change; Maximum Entropy; Species Distribution; Threatened Plants; Article; Beech; China; Climate Change; Endangered Species; Entropy; Eucommia Ulmoides; Global Climate; Liriodendron; Nonhuman; Precipitation; Probability; Random Forest; Species Distribution; Species Invasion; Species Richness	article; beech; China; climate change; endangered species; entropy; Eucommia ulmoides; global climate; Liriodendron; nonhuman; precipitation; probability; random forest; species distribution; species invasion; species richness			Angelieri, Cintia Camila, Using species distribution models to predict potential landscape restoration effects on puma conservation, PLOS ONE, 11, 1, (2016); Ghehsareh Ardestani, Elham Ghehsare, Potential habitat modeling for reintroduction of three native plant species in central Iran, Journal of Arid Land, 7, 3, pp. 381-390, (2015); Beals, Edward W., Bray-curtis ordination: An effective strateg…		PeerJ Inc. pete@peerj.com						21678359				English	Article	Final	All Open Access; Gold Open Access; Green Accepted Open Access; Green Final Open Access; Green Open Access	Scopus	2-s2.0-85073382734
N., Imanberdieva, Nazgul; B., Imankul, Bazaraliev; Z., Severoǧlu, Zeki; V., Altay, Volkan; M.A., Öztürk, Münir A.	Imanberdieva, Nazgul (56910198400); Imankul, Bazaraliev (57216682955); Severoǧlu, Zeki (37041553300); Altay, Volkan (16311550600); Öztürk, Münir A. (7102666117)	56910198400; 57216682955; 37041553300; 16311550600; 7102666117	Potential impacts of climate change on plant diversity of sary-chelek biosphere reserve in Kyrgyzstan	2018					349	364	0	36	10.1007/978-3-319-99728-5_15	https://www.scopus.com/inward/record.uri?eid=2-s2.0-85084274283&doi=10.1007%2F978-3-319-99728-5_15&partnerID=40&md5=6999dbb39d9d096ce568110d7ae406cf	Kyrgyz-Turkish Manas University, Bishkek, Kyrgyzstan; Sary-Chelek Government Biosphere Reserve, Kyrgyzstan; Marmara Üniversitesi, Istanbul, Turkey; Mustafa Kemal Üniversitesi, Antakya, Turkey; Ege Üniversitesi, Izmir, Turkey	Imanberdieva, Nazgul, Department of Biology, Kyrgyz-Turkish Manas University, Bishkek, Kyrgyzstan; Imankul, Bazaraliev, Sary-Chelek Government Biosphere Reserve, Kyrgyzstan; Severoǧlu, Zeki, Department of Biology, Kyrgyz-Turkish Manas University, Bishkek, Kyrgyzstan, Department of Biology, Marmara Üniversitesi, Istanbul, Turkey; Altay, Volkan, Department of Biology, Mustafa Kemal Üniversitesi, An…	The Sary-Chelek Nature Reserve established in 1959 with an area of 239 km<inf>2</inf> and declared as a UNESCO-MAB Biosphere Reserve in 1978 is located on the southeast-facing slope of the northern Chatkal Range in central Jalalabad province. It is centered around the scenic Sary-Chelek Lake. The mountains immediately surrounding the lake abound in exceptionally diverse flora and fauna, what may …	Biodiversity; Biosphere Reserve; Climate Change; Sary-chelek				Ahmad, Mushtaq, Interdependence of biodiversity, applied ethnobotany, and conservation in higher ecosystems of northern Pakistan under fast climatic changes, pp. 455-489, (2015); Bishkek Kyrgyzstan Frunze, (1971); Iucn Gland, (2010); Araújo, Miguel B., Climate change threatens European conservation areas, Ecology Letters, 14, 5, pp. 484-492, (2011); Bellard, Céline, Impacts of climate change on t…		Springer International Publishing							9783319997278; 9783319997285			English	Book chapter	Final		Scopus	2-s2.0-85084274283
A., Wróblewska, Ada; P., Mirski, Paweł	Wróblewska, Ada (7003491134); Mirski, Paweł (35115142400)	7003491134; 35115142400	From past to future: impact of climate change on range shifts and genetic diversity patterns of circumboreal plants	2018	Regional Environmental Change	18	2		409	424	0	23	10.1007/s10113-017-1208-3	https://www.scopus.com/inward/record.uri?eid=2-s2.0-85028555477&doi=10.1007%2Fs10113-017-1208-3&partnerID=40&md5=a23a86954302fefe5c690a9bbac5144a	Uniwersytet w Bialymstoku, Bialystok, Poland	Wróblewska, Ada, Institute of Biology, Uniwersytet w Bialymstoku, Bialystok, Poland; Mirski, Paweł, Institute of Biology, Uniwersytet w Bialymstoku, Bialystok, Poland	Climate change is projected to influence the genetic resources of plant species. Recent research has examined genetic diversity patterns under current climate conditions, with little attention to the future genetic consequences for species. In this study, we combined ecological niche modeling and population genetic approaches to project future changes in genetic diversity using plastid and nuclea…	Aflp; Chamaedaphne Calyculata; Cpdna; Ecological Niche Modeling; Its; Linnaea Borealis Ssp. Borealis; Neutral Genetic Diversity; Pedicularis Sceptrum-carolinum Ssp. Carolinum; Phylogeography; Range Dynamics; Refugia				Abbott, RICHARD J., Evolution in the Arctic: A phylogeographic analysis of the circumarctic plant, Saxifraga oppositifolia (Purple saxifrage), New Phytologist, 161, 1, pp. 211-224, (2004); Aguinagalde, Itzíar, Effects of life-history traits and species distribution on genetic structure at maternally inherited markers in European trees and shrubs, Journal of Biogeography, 32, 2, pp. 329-339, (2005…		Springer Verlag service@springer.de						1436378X; 14363798				English	Article	Final	All Open Access; Hybrid Gold Open Access	Scopus	2-s2.0-85028555477
A., Ordonez, Alejandro; J.C., Svenning, Jens Christian	Ordonez, Alejandro (24335582100); Svenning, Jens Christian (55010991900)	24335582100; 55010991900	Consistent role of Quaternary climate change in shaping current plant functional diversity patterns across European plant orders	2017	Scientific Reports	7		42988			0	35	10.1038/srep42988	https://www.scopus.com/inward/record.uri?eid=2-s2.0-85013829161&doi=10.1038%2Fsrep42988&partnerID=40&md5=9ff15c5681678ad165d03e06a8c9bc9f	Aarhus Universitet, Aarhus, Denmark	Ordonez, Alejandro, Department of Biosciences, Aarhus Universitet, Aarhus, Denmark; Svenning, Jens Christian, Department of Biosciences, Aarhus Universitet, Aarhus, Denmark	Current and historical environmental conditions are known to determine jointly contemporary species distributions and richness patterns. However, whether historical dynamics in species distributions and richness translate to functional diversity patterns remains, for the most part, unknown. The geographic patterns of plant functional space size (richness) and packing (dispersion) for six widely d…	Angiosperm; Climate Change; Ecosystem; Environmental Factor; Interglacial; Late Quaternary; Nonhuman; Paleoclimate; Productivity; Topography; Biodiversity; Caryophyllales; Europe; Growth, Development And Aging; Physiology; Plant Development; Population Dynamics; Rosales; Biodiversity; Climate Change; Ecosystem; Plant Development; Population Dynamics	angiosperm; climate change; ecosystem; environmental factor; interglacial; Late Quaternary; nonhuman; paleoclimate; productivity; topography; biodiversity; Caryophyllales; Europe; growth, development and aging; physiology; plant development; population dynamics; Rosales; Biodiversity; Climate Change; Ecosystem; Plant Development; Population Dynamics			Svenning, Jens Christian, Could the tree diversity pattern in Europe be generated by postglacial dispersal limitation?, Ecology Letters, 10, 6, pp. 453-460, (2007); Svenning, Jens Christian, Geography, topography, and history affect realized-to-potential tree species richness patterns in Europe, Ecography, 33, 6, pp. 1070-1080, (2010); Svenning, Jens Christian, Ice age legacies in the geographica…		Nature Publishing Group Houndmills Basingstoke, Hampshire RG21 6XS						20452322			28230069	English	Article	Final	All Open Access; Gold Open Access; Green Final Open Access; Green Open Access	Scopus	2-s2.0-85013829161
P.G., Ossa, Paulina G.; J.J., Armesto, Juan J.; F., Pérez, Fernánda	Ossa, Paulina G. (55889229500); Armesto, Juan J. (7003982810); Pérez, Fernánda (14043989300)	55889229500; 7003982810; 14043989300	Assessing the influence of life form and life cycle on the response of desert plants to past climate change: Genetic diversity patterns of an herbaceous lineage of nolana along western South America	2017	American Journal of Botany	104	10		1533	1545	0	6	10.3732/ajb.1700101	https://www.scopus.com/inward/record.uri?eid=2-s2.0-85032664854&doi=10.3732%2Fajb.1700101&partnerID=40&md5=dd5e4dbfdf2e537cd7a3c180aa56b327	Universidad Andrés Bello, Santiago, Chile; Pontificia Universidad Católica de Chile, Santiago, Chile; Instituto de Ecología y Biodiversidad, Santiago, Chile	Ossa, Paulina G., Centro de Biotecnología Vegetal, Universidad Andrés Bello, Santiago, Chile, Department of Ecology, Pontificia Universidad Católica de Chile, Santiago, Chile; Armesto, Juan J., Department of Ecology, Pontificia Universidad Católica de Chile, Santiago, Chile, Instituto de Ecología y Biodiversidad, Santiago, Chile; Pérez, Fernánda, Department of Ecology, Pontificia Universidad Cató…	PREMISE OF THE STUDY: Plant responses to past climate change could have been shaped by life-history traits. Here we explore the influence of life form on the response of xerophytic plants to Quaternary climate fluctuations, through a comparison of genetic patterns of codistributed herbaceous and shrubby lineages of the genus Nolana. METHODS: We reconstructed the phylogeographic history of a herba…	Coastal Atacama Desert; Comparative Phylogeography; Life Cycle; Life Form; Multiple Refugia; Nolana; Phylogeography Of Desert Plants; Quaternary Climate Oscillations; Solanaceae; Angiosperm; Climate Change; Comparative Study; Divergence; Genetic Analysis; Genetic Differentiation; Life Cycle; Persistence; Phylogeography; Quaternary; Refugium; Atacama Desert; Chile; South America; Nolana; Solanacea…	angiosperm; climate change; comparative study; divergence; genetic analysis; genetic differentiation; life cycle; persistence; phylogeography; Quaternary; refugium; Atacama Desert; Chile; South America; Nolana; Solanaceae; desert climate; environment; genetic drift; genetic variation; genetics; haplotype; life cycle stage; physiology; Climate Change; Desert Climate; Environment; Genetic Drift; Ge…			Alvarez, Nadir, History or ecology? Substrate type as a major driver of patial genetic structure in Alpine plants, Ecology Letters, 12, 7, pp. 632-640, (2009); EFFECTS OF ARIDITY ON PLANT DIVERSITY IN THE NORTHERN CHILEAN ANDES RESULTS OF A NATURAL EXPERIMENT, 75, 1, pp. 55-78; Phylogeography the History and Formation of Species, (2000); Genetics of Colonizing Species, (1965); Bandelt, Hans Jürge…		Botanical Society of America Inc.						00029122; 15372197		AJBOA	29885223	English	Article	Final	All Open Access; Bronze Open Access	Scopus	2-s2.0-85032664854
A., Ali, Arshad; U., Molau, Ulf; Y., Bai, Yang; A.K., Jägerbrand, Annika K.; J.M., Alatalo, Juha M.	Ali, Arshad (56667993200); Molau, Ulf (7004386091); Bai, Yang (55461106100); Jägerbrand, Annika K. (6507780999); Alatalo, Juha M. (6602792035)	56667993200; 7004386091; 55461106100; 6507780999; 6602792035	Diversity-productivity dependent resistance of an alpine plant community to different climate change scenarios	2016	Ecological Research	31	6		935	945	0	3	10.1007/s11284-016-1403-6	https://www.scopus.com/inward/record.uri?eid=2-s2.0-84990831312&doi=10.1007%2Fs11284-016-1403-6&partnerID=40&md5=5e62c3e4e8c274701ec67addfef2b0f8	East China Normal University, Shanghai, China; Forest Ecosystem Research and Observation Station in Putuo Island, Zhoushan, China; East China Normal University, Shanghai, China; Göteborgs Universitet, Gothenburg, Sweden; Xishuangbanna Tropical Botanical Garden Chinese Academy of Sciences, Mengla, China; Swedish National Road and Transport Research Institute, Linkoping, Sweden; Department of Biolo…	Ali, Arshad, School of Ecological and Environmental Sciences, East China Normal University, Shanghai, China, Forest Ecosystem Research and Observation Station in Putuo Island, Zhoushan, China, East China Normal University, Shanghai, China; Molau, Ulf, Department of Biology and Environment Science, Göteborgs Universitet, Gothenburg, Sweden; Bai, Yang, Xishuangbanna Tropical Botanical Garden Chines…	Here we report from a experiment imposing different warming scenarios [control with ambient temperature, constant level of moderate warming for 3 years, stepwise increase in warming for 3 years, and one season of high level warming (pulse) simulating an extreme summer event] on an alpine ecosystem to study the impact on species diversity–biomass relationship, and community resistance in terms of …	Biomass; Climate Variability; Community Resistance; Extreme Climatic Events; Species Diversity; Alpine Environment; Biomass; Climate Change; Complementarity; Ecological Modeling; Extreme Event; Niche; Plant Community; Species Diversity	alpine environment; biomass; climate change; complementarity; ecological modeling; extreme event; niche; plant community; species diversity			Alatalo, Juha M., Testing reliability of short-term responses to predict longer-term responses of bryophytes and lichens to environmental change, Ecological Indicators, 58, pp. 77-85, (2015); Alatalo, Juha M., Climate change and climatic events: community-, functional- and species-level responses of bryophytes and lichens to constant, stepwise, and pulse experimental warming in an alpine tundra, …		Springer Tokyo orders@springer.jp						14401703; 09123814		ECRSE		English	Article	Final		Scopus	2-s2.0-84990831312
J., Wu, Jianshuang; S., Wurst, Susanne; X., Zhang, Xianzhou	Wu, Jianshuang (50263579100); Wurst, Susanne (55938263600); Zhang, Xianzhou (55715173900)	50263579100; 55938263600; 55715173900	Plant functional trait diversity regulates the nonlinear response of productivity to regional climate change in Tibetan alpine grasslands	2016	Scientific Reports	6		35649			0	50	10.1038/srep35649	https://www.scopus.com/inward/record.uri?eid=2-s2.0-84992077436&doi=10.1038%2Fsrep35649&partnerID=40&md5=1d0803553649e4e74e3d8a67d4500beb	Institute of Geographic Sciences and Natural Resources Research, Chinese Academy of Sciences, Beijing, China; Freie Universität Berlin, Berlin, Germany	Wu, Jianshuang, Institute of Geographic Sciences and Natural Resources Research, Chinese Academy of Sciences, Beijing, China, Dahlem Center of Plant Sciences, Freie Universität Berlin, Berlin, Germany; Wurst, Susanne, Dahlem Center of Plant Sciences, Freie Universität Berlin, Berlin, Germany; Zhang, Xianzhou, Institute of Geographic Sciences and Natural Resources Research, Chinese Academy of Scie…	The biodiversity-productivity relationship is still under debate for alpine grasslands on the Tibetan Plateau. We know little about direct and indirect effects of biotic and abiotic drivers on this relationship, especially in regard to plant functional trait diversity. Here, we examine how aboveground net primary productivity (ANPP) and precipitation use efficiency (PUE) respond to climate, soil …	Soil; Altitude; Climate Change; Grassland; Precipitation; Principal Component Analysis; Productivity; Soil; Species Diversity; Structural Equation Modeling; Water Availability; Biodiversity; Biological Variation; Chemistry; Ecosystem; Plant Development; Tibet; Rain; Biodiversity; Biological Variation, Population; Climate Change; Ecosystem; Grassland; Plant Development; Rain; Soil	altitude; climate change; grassland; precipitation; principal component analysis; productivity; soil; species diversity; structural equation modeling; water availability; biodiversity; biological variation; chemistry; ecosystem; plant development; Tibet; rain; Biodiversity; Biological Variation, Population; Climate Change; Ecosystem; Grassland; Plant Development; Rain; Soil		Soil	Chapin, F. Stuart, Consequences of changing biodiversity, Nature, 405, 6783, pp. 234-242, (2000); Hector, Andy, Biodiversity and ecosystem multifunctionality, Nature, 448, 7150, pp. 188-190, (2007); Isbell, Forest I., High plant diversity is needed to maintain ecosystem services, Nature, 477, 7363, pp. 199-202, (2011); Isbell, Forest I., The biodiversity-dependent ecosystem service debt, Ecology …		Nature Publishing Group Houndmills Basingstoke, Hampshire RG21 6XS						20452322			27759112	English	Article	Final	All Open Access; Gold Open Access; Green Final Open Access; Green Open Access	Scopus	2-s2.0-84992077436
T., Pütz, Thomas; R., Kiese, Ralf; U., Wollschläger, Ute; J., Groh, Jannis; H., Rupp, Holger; S., Zacharias, Steffen; E., Priesack, Eckart; H.H., Gerke, Horst H.; R., Gasche, Rainer; O., Bens, Oliver	Pütz, Thomas (6603158406); Kiese, Ralf (6506016655); Wollschläger, Ute (8235365600); Groh, Jannis (56201462400); Rupp, Holger (56214308400); Zacharias, Steffen (24315146100); Priesack, Eckart (55957610300); Gerke, Horst H. (7003510720); Gasche, Rainer (6602365862); Bens, Oliver (6603263597)	6603158406; 6506016655; 8235365600; 56201462400; 56214308400; 24315146100; 55957610300; 7003510720; 6602365862; 6603263597	TERENO-SOILCan: a lysimeter-network in Germany observing soil processes and plant diversity influenced by climate change	2016	Environmental Earth Sciences	75	18	1242			0	87	10.1007/s12665-016-6031-5	https://www.scopus.com/inward/record.uri?eid=2-s2.0-84987776590&doi=10.1007%2Fs12665-016-6031-5&partnerID=40&md5=f9366c6259e456f3285abe1ae64a3eec	Forschungszentrum Jülich GmbH, Julich, Germany; Karlsruher Institut für Technologie, Karlsruhe, Germany; Helmholtz Zentrum für Umweltforschung, Leipzig, Germany; Helmholtz Zentrum für Umweltforschung, Leipzig, Germany; HMGU, Oberschleissheim, Germany; Leibniz-Zentrum für Agrarlandschaftsforschung (ZALF) e. V., Muncheberg, Germany; GFZ Helmholtz Centre for Geosciences, Potsdam, Germany; Deutsches …	Pütz, Thomas, Institute of Bio- and Geosciences: Agrosphere (IBG-3), Forschungszentrum Jülich GmbH, Julich, Germany; Kiese, Ralf, Karlsruher Institut für Technologie, Karlsruhe, Germany; Wollschläger, Ute, Department of Soil Physics, Helmholtz Zentrum für Umweltforschung, Leipzig, Germany; Groh, Jannis, Institute of Bio- and Geosciences: Agrosphere (IBG-3), Forschungszentrum Jülich GmbH, Julich, …	The aim of TERENO (TERrestrial ENvironmental Observatories) is to collect long-term observation data on the hydrosphere, biosphere, pedosphere, lower atmosphere and anthroposphere along multiple spatial and temporal gradients in climate sensitive regions across Germany. The lysimeter-network SOILCan was installed as a part of TERENO between March and December 2010 within the four observatories. I…	Climate Change; Controlled Lower Boundary; Matter Flux; Plant Functional Diversity; Soil Processes; Water Balance; Weighable Precision Lysimeter; Agriculture; Biodiversity; Biospherics; Carbon; Climate Models; Crops; Ecology; Ecosystems; Groundwater; Hydrology; Hydrosphere; Lysimeters; Observatories; Remote Sensing; Soil Surveys; Soils; Lower Boundary; Matter Flux; Plant Functional Diversities; S…	Agriculture; Biodiversity; Biospherics; Carbon; Climate models; Crops; Ecology; Ecosystems; Groundwater; Hydrology; Hydrosphere; Lysimeters; Observatories; Remote sensing; Soil surveys; Soils; Lower boundary; Matter flux; Plant functional diversities; Soil process; Water balance; Climate change; calibration; climate change; ecological approach; experimental study; functional role; lysimeter; nutr…			Hydrologie Und Wasserbewirtschaftung, (2012); Bogena, Heye R., A terrestrial observatory approach to the integrated investigation of the effects of deforestation on water, energy, and matter fluxes, Science China Earth Sciences, 58, 1, pp. 61-75, (2015); de Bello, Francesco, Towards an assessment of multiple ecosystem processes and services via functional traits, Biodiversity and Conservation, 19…		Springer Verlag service@springer.de						18666299; 18666280	9783540959908			English	Article	Final		Scopus	2-s2.0-84987776590
J., Wan, Jizhong; C., Wang, Chunjing; C., Liu, Chunxiang; H., Li, Hongli	Wan, Jizhong (56072661000); Wang, Chunjing (55234798300); Liu, Chunxiang (55890201600); Li, Hongli (57037952700)	56072661000; 55234798300; 55890201600; 57037952700	Climate change may alter genetic diversity of Duchesnea indica, a clonal plant species	2016	Biochemical Systematics and Ecology	66			114	122	0	8	10.1016/j.bse.2016.03.002	https://www.scopus.com/inward/record.uri?eid=2-s2.0-84961840015&doi=10.1016%2Fj.bse.2016.03.002&partnerID=40&md5=bb2afba4c93a9ffd9a7f29acd2d6468e	Beijing Forestry University, Beijing, China	Wan, Jizhong, School of Nature Conservation, Beijing Forestry University, Beijing, China; Wang, Chunjing, School of Nature Conservation, Beijing Forestry University, Beijing, China; Liu, Chunxiang, School of Nature Conservation, Beijing Forestry University, Beijing, China; Li, Hongli, School of Nature Conservation, Beijing Forestry University, Beijing, China	Climate change may alter the genetic diversity of plants. However, the relationship between genetic diversity in clonal plant species and climate change is unclear. To address this, we examined a representative clonal plant species, Duchesnea indica. We used microsatellite markers to analyze the genetic diversity of the species and used a correlation analysis to infer the relationship between cli…	Climatic Suitability; Clonal Plants; Gas Concentration; Genetic Diversity; Maxent Software; Climate Change; Clonal Organism; Concentration (composition); Correlation; Dicotyledon; Gas Exchange; Genetic Marker; Genetic Variation; Gis; Software; Duchesnea Indica	climate change; clonal organism; concentration (composition); correlation; dicotyledon; gas exchange; genetic marker; genetic variation; GIS; software; Duchesnea indica			Alsos, Inger Greve, Genetic consequences of climate change for northern plants, Proceedings of the Royal Society B: Biological Sciences, 279, 1735, pp. 2042-2051, (2012); Buckley, Lauren B., Does including physiology improve species distribution model predictions of responses to recent climate change?, Ecology, 92, 12, pp. 2214-2221, (2011); Campbell, Diane R., Natural selection on floral morphol…		Elsevier Ltd						3051978		BSECB		English	Article	Final		Scopus	2-s2.0-84961840015
Y., Zeng, Yong; T., Liu, Tong; X.B., Zhou, Xiaobing B.; Q., Sun, Qinming; Z., Han, Zhiquan; K., Liu, Kang	Zeng, Yong (57217432362); Liu, Tong (55727776500); Zhou, Xiaobing B. (55743214000); Sun, Qinming (55170704000); Han, Zhiquan (36655752900); Liu, Kang (57226078969)	57217432362; 55727776500; 55743214000; 55170704000; 36655752900; 57226078969	Effects of climate change on plant composition and diversity in the Gurbantünggüt Desert of northwestern China	2016	Ecological Research	31	3		427	439	0	26	10.1007/s11284-016-1352-0	https://www.scopus.com/inward/record.uri?eid=2-s2.0-84961793653&doi=10.1007%2Fs11284-016-1352-0&partnerID=40&md5=1863cd3fb19585c1ac20b6ae69a8da05	Shihezi University, Shihezi, China; Xinjiang Academy of Forestry Sciences, Urumqi, China; Xinjiang Institute of Ecology and Geography Chinese Academy of Sciences, Urumqi, China; Shihezi University, Shihezi, China	Zeng, Yong, College of Life Sciences, Shihezi University, Shihezi, China, Xinjiang Academy of Forestry Sciences, Urumqi, China; Liu, Tong, College of Life Sciences, Shihezi University, Shihezi, China; Zhou, Xiaobing B., Key Laboratory of Biogeography and Bioresource in Arid Land, Xinjiang Institute of Ecology and Geography Chinese Academy of Sciences, Urumqi, China; Sun, Qinming, College of Life …	Understanding changes in plant diversity is important with changing climate in desert ecosystems. We analyzed the changes in species richness and plant functional types in different landscape positions and species turnover between five sub-regions of the Gurbantünggüt Desert, China, from 2009 to 2013. We also analyzed how species density, richness, and plant functional types responded to annual p…	Cv Of Daily Precipitation; Cv Of Monthly Temperature; Mean Annual Temperature; Precipitation Amounts; Species Richness; Climate Effect; Community Structure; Diversity Index; Dune Field; Heterogeneity; Plant Community; Population Decline; Precipitation Intensity; Species Diversity; Species Richness; Temperature Effect; China; Gurbantunggut Desert; Xinjiang Uygur; Haloxylon Ammodendron; Haloxylon P…	climate effect; community structure; diversity index; dune field; heterogeneity; plant community; population decline; precipitation intensity; species diversity; species richness; temperature effect; China; Gurbantunggut Desert; Xinjiang Uygur; Haloxylon ammodendron; Haloxylon persicum			Adler, Peter B., Contrasting relationships between precipitation and species richness in space and time, Oikos, 116, 2, pp. 221-232, (2007); Adler, Robert F., The version-2 global precipitation climatology project (GPCP) monthly precipitation analysis (1979-present), Journal of Hydrometeorology, 4, 6, pp. 1147-1167, (2003); Anderson, Jay E., Landscape-scale changes in plant species abundance and …		Springer Tokyo orders@springer.jp						14401703; 09123814		ECRSE		English	Article	Final		Scopus	2-s2.0-84961793653
J.N., Phelan, Jennifer N.; S., Belyazid, Salim; P.W., Jones, Phillip W.; J.C., Cajka, James C.; J., Buckley, John; C.M., Clark, Christopher M.	Phelan, Jennifer N. (24067684000); Belyazid, Salim (9734198400); Jones, Phillip W. (57116885100); Cajka, James C. (14119601700); Buckley, John (57117163100); Clark, Christopher M. (55368679100)	24067684000; 9734198400; 57116885100; 14119601700; 57117163100; 55368679100	Assessing the Effects of Climate Change and Air Pollution on Soil Properties and Plant Diversity in Sugar Maple-Beech-Yellow Birch Hardwood Forests in the Northeastern United States: Model Simulations from 1900 to 2100	2016	Water, Air, and Soil Pollution	227	3	84			0	17	10.1007/s11270-016-2762-x	https://www.scopus.com/inward/record.uri?eid=2-s2.0-84958231639&doi=10.1007%2Fs11270-016-2762-x&partnerID=40&md5=a3cffc7c5cc6f171f82a48699eaf3a3f	RTI International, Research Triangle Park, United States; Belyazid Consulting and Communication AB, Malmo, Sweden; United States Environmental Protection Agency, Washington, D.C., United States	Phelan, Jennifer N., RTI International, Research Triangle Park, United States; Belyazid, Salim, Belyazid Consulting and Communication AB, Malmo, Sweden; Jones, Phillip W., RTI International, Research Triangle Park, United States; Cajka, James C., RTI International, Research Triangle Park, United States; Buckley, John, RTI International, Research Triangle Park, United States; Clark, Christopher M.…	Historical deposition of nitrogen (N) and sulfur (S) over the Eastern United States has impacted ecosystem structure and function. The potential for recovery of ecosystems is relatively uncertain, with deposition paired with future climate change contributing to this uncertainty. The impacts of N and S deposition and climate change (from 1900 to 2100) on two sugar maple-beech-yellow birch sites i…	Bear Brook; Climate; Deposition; Hubbard Brook; Model; Soil; Understory Vegetation; Nitrogen; Sulfur; Climate Models; Deposition; Ecology; Ecosystems; Forestry; Models; Recovery; Soils; Vegetation; Bear Brook; Climate; Hubbard; Hubbard Brook Experimental Forest; Increased Temperature; Intergovernmental Panel On Climate Changes; Soil Acid-base Chemistries; Understory Vegetation; Climate Change; Ni…	Climate models; Deposition; Ecology; Ecosystems; Forestry; Models; Recovery; Soils; Vegetation; Bear Brook; Climate; Hubbard; Hubbard Brook experimental forest; Increased temperature; Intergovernmental panel on climate changes; Soil acid-base chemistries; Understory vegetation; Climate change; nitrogen; sulfur; atmospheric deposition; atmospheric pollution; climate change; computer simulation; ec…		nitrogen, 7727-37-9; sulfur, 13981-57-2, 7704-34-9	Aber, John D., Effects of land use, climate variation, and N deposition on N cycling and C storage in northern hardwood forests, Global Biogeochemical Cycles, 11, 4, pp. 639-648, (1997); Bioscience, (1989); Aber, John D., Nitrogen saturation in temperate forest ecosystems: Hypotheses revisited, BioScience, 48, 11, pp. 921-934, (1998); Aber, John D., Is nitrogen deposition altering the nitrogen st…		Springer International Publishing						00496979; 15732932		WAPLA		English	Article	Final		Scopus	2-s2.0-84958231639
M., Ghesquière, Marc; T., Bourgoin, T.; J.L., Durand, Jean Louis; F.A., Volaire, Florence A.; J.P., Sampoux, Jean Paul	Ghesquière, Marc (6603231001); Bourgoin, T. (56982815400); Durand, Jean Louis (7402878751); Volaire, Florence A. (55910750900); Sampoux, Jean Paul (6506679089)	6603231001; 56982815400; 7402878751; 55910750900; 6506679089	Confronting climate change using plant genetic diversity: Available margin of improvement in forage grasses; Quelles innovations variétales face au changement climatique? Les marges de progrès génétique chez les graminées fourragères	2016	Fourrages	2016	225		29	38	0	1		https://www.scopus.com/inward/record.uri?eid=2-s2.0-85050193870&partnerID=40&md5=20597de7585c6564999b8aaa56438df4	Unité de Recherche Pluridisciplinaire Prairies et Plantes Fourragères (P3F), Lusignan, France; Agri-Obtentions, Lusignan, France; Université de Montpellier, Montpellier, France	Ghesquière, Marc, Unité de Recherche Pluridisciplinaire Prairies et Plantes Fourragères (P3F), Lusignan, France; Bourgoin, T., Agri-Obtentions, Lusignan, France; Durand, Jean Louis, Unité de Recherche Pluridisciplinaire Prairies et Plantes Fourragères (P3F), Lusignan, France; Volaire, Florence A., Université de Montpellier, Montpellier, France; Sampoux, Jean Paul, Unité de Recherche Pluridiscipli…	How will climate change affect the breeding of forage species? This question was addressed by the CLiMagie research project using multiscale experimental approaches. among others, these included i) performing crosses of Mediterranean natives and of diploid and tetraploid plants found within the same species complexes; ii) modelling the distribution of natural diversity at various spatial scales; …	Climatic Change; Cocksfoot; Cultivar Breeding; Drought; Environmental Factor; Forage; Genetic Progress; Genomics; Grass; Grassland; Intraspecific Variablity; Mediterranean Region; Method; Molecular Marking; Natural Population; Tall Fescue; Temperate Region				Adaptation Des Prairies Semees Au Changement Climatique, (2015); Adaptation Des Prairies Semees Au Changement Climatique, (2015); Annual Report Welsh Plant Breeding Station, (1978); Borrill, Martin, A Chromosome Atlas of the Genus Dactylis (Part two), Cytologia, 34, 1, pp. 6-17, (1969); Borrill, Martin, DIPLOID‐TETRAPLOID SYMPATRY IN DACTYLIS(GRAMINEAE), New Phytologist, 70, 6, pp. 1111-1124, (19…		Association Francaise pour la Production Fourragere vferry@versailles.inra.fr						4292766				French	Article	Final		Scopus	2-s2.0-85050193870
K.A., Brown, Kerry A.; K.E., Parks, Katherine E.; C.A., Bethell, Colin A.; S.E., Johnson, Steig E.; M., Mulligan, Mark	Brown, Kerry A. (57191496658); Parks, Katherine E. (36140493400); Bethell, Colin A. (56647941700); Johnson, Steig E. (7406329541); Mulligan, Mark (57208275038)	57191496658; 36140493400; 56647941700; 7406329541; 57208275038	Predicting plant diversity patterns in madagascar: Understanding the effects of climate and land cover change in a biodiversity hotspot	2015	PLOS ONE	10	4	e0122721			0	49	10.1371/journal.pone.0122721	https://www.scopus.com/inward/record.uri?eid=2-s2.0-84929501442&doi=10.1371%2Fjournal.pone.0122721&partnerID=40&md5=66aede3165ebcce9bb01724f465044b4	Kingston University, Kingston Upon Thames, United Kingdom; University of Southampton, Southampton, United Kingdom; Kingston University, Kingston Upon Thames, United Kingdom; University of Calgary, Calgary, Canada; King's College London, London, United Kingdom	Brown, Kerry A., School of Geography, Kingston University, Kingston Upon Thames, United Kingdom; Parks, Katherine E., Centre for Environmental Sciences, University of Southampton, Southampton, United Kingdom; Bethell, Colin A., Faculty of Science, Kingston University, Kingston Upon Thames, United Kingdom; Johnson, Steig E., Department of Archaeology, University of Calgary, Calgary, Canada; Mullig…	Climate and land cover change are driving a major reorganization of terrestrial biotic communities in tropical ecosystems. In an effort to understand how biodiversity patterns in the tropics will respond to individual and combined effects of these two drivers of environmental change, we use species distribution models (SDMs) calibrated for recent climate and land cover variables and projected to …	Article; Biodiversity; Biogeographic Region; Climate Change; Conceptual Framework; Controlled Study; Deforestation; Environmental Change; Environmental Temperature; Land Use; Madagascar; Model; Nonhuman; Plant Ecology; Species Distribution; Species Diversity; Species Habitat; Species Richness; Algorithm; Biological Model; Ecosystem; Genetics; Geography; Plant; Plant Dispersal; Population Dynamics…	Article; biodiversity; biogeographic region; climate change; conceptual framework; controlled study; deforestation; environmental change; environmental temperature; land use; Madagascar; model; nonhuman; plant ecology; species distribution; species diversity; species habitat; species richness; algorithm; biological model; ecosystem; genetics; geography; plant; plant dispersal; population dynamics…			Anderson-Teixeira, Kristina J., Altered dynamics of forest recovery under a changing climate, Global Change Biology, 19, 7, pp. 2001-2021, (2013); Chen, I. Ching, Rapid range shifts of species associated with high levels of climate warming, Science, 333, 6045, pp. 1024-1026, (2011); Crimmins, Shawn M., Changes in climatic water balance drive downhill shifts in plant species' optimum elevations, S…		Public Library of Science plos@plos.org						19326203		POLNC	25856241	English	Article	Final	All Open Access; Gold Open Access; Green Accepted Open Access; Green Final Open Access; Green Open Access	Scopus	2-s2.0-84929501442
S., Terzioǧlu, Salih; A., Tüfekéioglu, Aydin; M., Küçük, Mahir	Terzioǧlu, Salih (6601943290); Tüfekéioglu, Aydin (56910060900); Küçük, Mahir (37024307500)	6601943290; 56910060900; 37024307500	Vegetation and plant diversity of high-altitude mountains in eastern karadeniz (black sea) region of Turkey and climate change interactions	2015					383	408	0	8	10.1007/978-3-319-12859-7_15	https://www.scopus.com/inward/record.uri?eid=2-s2.0-84944535548&doi=10.1007%2F978-3-319-12859-7_15&partnerID=40&md5=c0ccd114be83f384d3dec86bfa948776	Karadeniz Technical University, Trabzon, Turkey; Artvin Coruh University, Artvin, Turkey; UNDP-UN House, Ankara, Turkey	Terzioǧlu, Salih, Department of Forest Botany, Karadeniz Technical University, Trabzon, Turkey; Tüfekéioglu, Aydin, Department of Forestry, Artvin Coruh University, Artvin, Turkey; Küçük, Mahir, UNDP-UN House, Ankara, Turkey	This chapter presents an overview of the plant diversity and climate change interactions covering the eastern Karadeniz region (Black Sea). The flora and plant associations reported from the high altitudes in the region are summarized. A total of 3210 vascular plant taxa have been reported as native or naturalized in the region; of these, 465 taxa are endemic to Turkey, 50 endemics are included i…	Climate Change; Karadeniz Region (black Sea); Plant Diversity; Turkey; Vegetation				Turkiye Orman Vejetasyonu, (1995); Distribution Flora and Phytosociological Traits of Ostrya Carpinifolia in Turkey, (2003); Coşkunçelebi, Kamil, A new alien species for the flora of Turkey: Bidens frondosa L. (Asteraceae), Turkish Journal of Botany, 31, 5, pp. 477-479, (2007); Climate Change and Turkey Impacts Sectoral Analyses Socio Economic Dimensions, (2007); Davis, P. H., FLORA OF TURKEY and…		Springer International Publishing							9783319128580; 9783319128597			English	Book chapter	Final		Scopus	2-s2.0-84944535548
W., Thuiller, Wilfried; M., Gueguen, Maya; D., Georges, Damien; R., Bonet, Richard; L., Chalmandrier, Loïc; L., Garraud, Luc; J., Renaud, Julien; C., Roquet, Cristina; J., van Es, Jérémie; N.E., Zimmermann, Niklaus E.	Thuiller, Wilfried (6602123683); Gueguen, Maya (56045408000); Georges, Damien (55963566500); Bonet, Richard (56045370100); Chalmandrier, Loïc (55661624000); Garraud, Luc (8909849500); Renaud, Julien (55749558100); Roquet, Cristina (23996224100); van Es, Jérémie (16305715500); Zimmermann, Niklaus E. (7005513010)	6602123683; 56045408000; 55963566500; 56045370100; 55661624000; 8909849500; 55749558100; 23996224100; 16305715500; 7005513010	Are different facets of plant diversity well protected against climate and land cover changes? A test study in the French Alps	2014	Ecography	37	12		1254	1266	0	58	10.1111/ecog.00670	https://www.scopus.com/inward/record.uri?eid=2-s2.0-84913620339&doi=10.1111%2Fecog.00670&partnerID=40&md5=59e9fcaa92d0d416d7b0ab192390de94	Laboratoire d’Écologie Alpine (LECA), Grenoble, France; Gap General Hospital, Gap, France; Gap General Hospital, Gap, France; Eidgenössische Forschungsanstalt für Wald, Schnee und Landschaft WSL, Birmensdorf, Switzerland	Thuiller, Wilfried, Laboratoire d’Écologie Alpine (LECA), Grenoble, France; Gueguen, Maya, Laboratoire d’Écologie Alpine (LECA), Grenoble, France; Georges, Damien, Laboratoire d’Écologie Alpine (LECA), Grenoble, France; Bonet, Richard, Gap General Hospital, Gap, France; Chalmandrier, Loïc, Laboratoire d’Écologie Alpine (LECA), Grenoble, France; Garraud, Luc, Gap General Hospital, Gap, France; Ren…	Climate and land cover changes are important drivers of the plant species distributions and diversity patterns in mountainous regions. Although the need for a multifaceted view of diversity based on taxonomic, functional and phylogenetic dimensions is now commonly recognized, there are no complete risk assessments concerning their expected changes. In this paper, we used a range of species distri…					Alagador, Diogo A., A probability-based approach to match species with reserves when data are at different resolutions, Biological Conservation, 144, 2, pp. 811-820, (2011); Allouche, Omri, Assessing the accuracy of species distribution models: Prevalence, kappa and the true skill statistic (TSS), Journal of Applied Ecology, 43, 6, pp. 1223-1232, (2006); Anandhi, Aavudai, Examination of change fa…								16000587; 09067590		ECOGE		English	Article	Final	All Open Access; Green Accepted Open Access; Green Final Open Access; Green Open Access; Hybrid Gold Open Access	Scopus	2-s2.0-84913620339
B., Isabelle, Boulangeat; D., Georges, Damien; C., Dentant, Cédric; R., Bonet, Richard; J., van Es, Jérémie; S., Abdulhak, Sylvain; N.E., Zimmermann, Niklaus E.; W., Thuiller, Wilfried	Isabelle, Boulangeat (36438116000); Georges, Damien (55963566500); Dentant, Cédric (16303908400); Bonet, Richard (56045370100); van Es, Jérémie (16305715500); Abdulhak, Sylvain (55340644400); Zimmermann, Niklaus E. (7005513010); Thuiller, Wilfried (6602123683)	36438116000; 55963566500; 16303908400; 56045370100; 16305715500; 55340644400; 7005513010; 6602123683	Anticipating the spatio-temporal response of plant diversity and vegetation structure to climate and land use change in a protected area	2014	Ecography	37	12		1230	1239	0	46	10.1111/ecog.00694	https://www.scopus.com/inward/record.uri?eid=2-s2.0-84913604434&doi=10.1111%2Fecog.00694&partnerID=40&md5=73d41cb7e3a566f740af494db2489924	Laboratoire d’Écologie Alpine (LECA), Grenoble, France; Eidgenössische Forschungsanstalt für Wald, Schnee und Landschaft WSL, Birmensdorf, Switzerland	Isabelle, Boulangeat, Laboratoire d’Écologie Alpine (LECA), Grenoble, France; Georges, Damien, Laboratoire d’Écologie Alpine (LECA), Grenoble, France; Dentant, Cédric, ; Bonet, Richard, ; van Es, Jérémie, ; Abdulhak, Sylvain, ; Zimmermann, Niklaus E., Research Unit Forest Dynamics, Eidgenössische Forschungsanstalt für Wald, Schnee und Landschaft WSL, Birmensdorf, Switzerland; Thuiller, Wilfried, …	Vegetation is a key driver of ecosystem functioning (e.g. productivity and stability) and of the maintenance of biodiversity (e.g. creating habitats for other species groups). While vegetation sensitivity to climate change has been widely investigated, its spatio-temporally response to the dual effects of land management and climate change has been ignored at landscape scale. Here we use a dynami…					Albert, Cécile Hélène, Land-use change and subalpine tree dynamics: Colonization of Larix decidua in French subalpine grasslands, Journal of Applied Ecology, 45, 2, pp. 659-669, (2008); Bebi, Peter, Snow avalanche disturbances in forest ecosystems-State of research and implications for management, Forest Ecology and Management, 257, 9, pp. 1883-1892, (2009); Beckman, Noelle G., The interacting ef…								16000587; 09067590		ECOGE		English	Article	Final	All Open Access; Green Accepted Open Access; Green Final Open Access; Green Open Access; Hybrid Gold Open Access	Scopus	2-s2.0-84913604434
I., Gwitira, Isaiah; A., Murwira, Amon; M.D., Shekede, Munyaradzi Davis; M., Masocha, Mhosisi; C., Chapano, Christopher	Gwitira, Isaiah (55631978100); Murwira, Amon (8507485300); Shekede, Munyaradzi Davis (24477604100); Masocha, Mhosisi (15019370300); Chapano, Christopher (55839151600)	55631978100; 8507485300; 24477604100; 15019370300; 55839151600	Precipitation of the warmest quarter and temperature of the warmest month are key to understanding the effect of climate change on plant species diversity in Southern African savannah	2014	African Journal of Ecology	52	2		209	216	0	43	10.1111/aje.12105	https://www.scopus.com/inward/record.uri?eid=2-s2.0-84899486798&doi=10.1111%2Faje.12105&partnerID=40&md5=3603a4f143cd7993d3b320c43bfadbe2	University of Zimbabwe, Harare, Zimbabwe; National Herbarium and Botanic Garden, Harare, Zimbabwe	Gwitira, Isaiah, Department of Geography and Environmental Science, University of Zimbabwe, Harare, Zimbabwe; Murwira, Amon, Department of Geography and Environmental Science, University of Zimbabwe, Harare, Zimbabwe; Shekede, Munyaradzi Davis, Department of Geography and Environmental Science, University of Zimbabwe, Harare, Zimbabwe; Masocha, Mhosisi, Department of Geography and Environmental S…	In this study, we test for the key bioclimatic variables that significantly explain the current distribution of plant species richness in a southern African ecosystem as a preamble to predicting plant species richness under a changed climate. We used 54,000 records of georeferenced plant species data to calculate species richness and spatially interpolated climate data to derive nineteen bioclima…	Bioclimatic Modelling; Climate Change; Csiro Mk3; Global Circulation Models; Plant Species Richness; Regression Analysis; Bioclimatology; Biodiversity; Climate Change; Habitat Conservation; Plant Community; Precipitation (climatology); Regression Analysis; Savanna; Species Diversity; Species Richness; South Africa	bioclimatology; biodiversity; climate change; habitat conservation; plant community; precipitation (climatology); regression analysis; savanna; species diversity; species richness; South Africa			Adler, Peter B., Forecasting plant community impacts of climate variability and change: When do competitive interactions matter?, Journal of Ecology, 100, 2, pp. 478-487, (2012); Algar, Adam C., Predicting the future of species diversity: Macroecological theory, climate change, and direct tests of alternative forecasting methods, Ecography, 32, 1, pp. 22-33, (2009); Beaumont, Linda J., Predicting…		Blackwell Publishing Ltd customerservices@oxonblackwellpublishing.com						01416707; 13652028		AJOED		English	Article	Final		Scopus	2-s2.0-84899486798
D.V., Pio, Dorothea V.; R., Engler, Robin; H.P.P., Linder, H. Peter Peter; A., Monadjem, Ara; F.P.D., Cotterill, Fenton Peter David; P.J., Taylor, Peter John; M.C., Schoeman, M. Corrie; B.W., Price, Ben W.; M.H., Villet, Martin H.; G.N., Eick, Geeta N.	Pio, Dorothea V. (35722917100); Engler, Robin (23466174200); Linder, H. Peter Peter (56090998000); Monadjem, Ara (7004440617); Cotterill, Fenton Peter David (6603760683); Taylor, Peter John (55169941000); Schoeman, M. Corrie (8714601000); Price, Ben W. (16481131800); Villet, Martin H. (7004262479); Eick, Geeta N. (57191484832)	35722917100; 23466174200; 56090998000; 7004440617; 6603760683; 55169941000; 8714601000; 16481131800; 7004262479; 57191484832	Climate change effects on animal and plant phylogenetic diversity in southern Africa	2014	Global Change Biology	20	5		1538	1549	0	70	10.1111/gcb.12524	https://www.scopus.com/inward/record.uri?eid=2-s2.0-84898403712&doi=10.1111%2Fgcb.12524&partnerID=40&md5=ff4bcc2c8b5f69543e2e50232eda9180	Université de Lausanne (UNIL), Lausanne, Switzerland; Université de Lausanne (UNIL), Lausanne, Switzerland; Fauna & Flora International, Cambridge, United Kingdom; Universität Zürich, Zurich, Switzerland; University of Eswatini, Mbabane, Swaziland; Stellenbosch University, Stellenbosch, South Africa; Durban Natural Science Museum, Durban, South Africa; University of Venda, Thohoyandou, South Afri…	Pio, Dorothea V., Department of Ecology and Evolution, Université de Lausanne (UNIL), Lausanne, Switzerland, Université de Lausanne (UNIL), Lausanne, Switzerland, Fauna & Flora International, Cambridge, United Kingdom; Engler, Robin, Department of Ecology and Evolution, Université de Lausanne (UNIL), Lausanne, Switzerland; Linder, H. Peter Peter, Institute of Systematic Botany, Universität Zürich…	Much attention has been paid to the effects of climate change on species' range reductions and extinctions. There is however surprisingly little information on how climate change driven threat may impact the tree of life and result in loss of phylogenetic diversity (PD). Some plant families and mammalian orders reveal nonrandom extinction patterns, but many other plant families do not. Do these d…	Chiroptera; Cicadidae; Climate Change; Extinction; Niche Models; Phylogenetic Diversity; Platypleura; Proteaceae; Restionaceae; Southern Africa; Angiosperm; Bat; Biodiversity; Climate Effect; Climate Variation; Evolution; Extinction; Insect; Niche; Phylogenetics; Spatial Distribution; Speciation (biology); Southern Africa; Animalia; Chiroptera; Cicada; Cicadidae; Hexapoda; Mammalia; Platypleura; …	angiosperm; bat; biodiversity; climate effect; climate variation; evolution; extinction; insect; niche; phylogenetics; spatial distribution; speciation (biology); Southern Africa; Animalia; Chiroptera; Cicada; Cicadidae; Hexapoda; Mammalia; Platypleura; Proteaceae; Restionaceae			Akaike, Hirotsugu, A New Look at the Statistical Model Identification, IEEE Transactions on Automatic Control, 19, 6, pp. 716-723, (1974); Allouche, Omri, Assessing the accuracy of species distribution models: Prevalence, kappa and the true skill statistic (TSS), Journal of Applied Ecology, 43, 6, pp. 1223-1232, (2006); Bennett, Peter M., Variation in extinction risk among birds: Chance or evolut…		Blackwell Publishing Ltd customerservices@oxonblackwellpublishing.com						13541013; 13652486				English	Article	Final		Scopus	2-s2.0-84898403712
P., Wasowicz, Pawel; E.M., Przedpełska-Wąsowicz, Ewa Maria; H., Kristinsson, Hörour	Wasowicz, Pawel (6506883830); Przedpełska-Wąsowicz, Ewa Maria (55911721300); Kristinsson, Hörour (55949882100)	6506883830; 55911721300; 55949882100	Alien vascular plants in Iceland: Diversity, spatial patterns, temporal trends, and the impact of climate change	2013	Flora: Morphology, Distribution, Functional Ecology of Plants	208	2025-12-10		648	673	0	40	10.1016/j.flora.2013.09.009	https://www.scopus.com/inward/record.uri?eid=2-s2.0-84887609395&doi=10.1016%2Fj.flora.2013.09.009&partnerID=40&md5=7ce6881e6075afe46c92c9052670e040	Natural Science Institute of Iceland, Akranes, Iceland; University of Warsaw, Warsaw, Poland	Wasowicz, Pawel, Borgum vi Norursló, Natural Science Institute of Iceland, Akranes, Iceland; Przedpełska-Wąsowicz, Ewa Maria, Faculty of Biology, University of Warsaw, Warsaw, Poland; Kristinsson, Hörour, Borgum vi Norursló, Natural Science Institute of Iceland, Akranes, Iceland	The present study provides first comprehensive and up-to-date results on alien plant taxa in Iceland since 1967. We evidenced the presence of 336 alien vascular plant taxa, including 277 casuals and 59 naturalised taxa, two being invasive. The distribution of the alien flora exhibits a clear spatial pattern showing hotspots of occurrence and diversity within areas of major settlement centres. Alt…	Alien Flora; Climate Change; Iceland; Invasive Species; Maxent; Predictive Modelling; Climate Change; Flora; Introduced Species; Invasive Species; Meta-analysis; Sea Level; Species Diversity; Taxonomy; Vascular Plant; Iceland; Tracheophyta	climate change; flora; introduced species; invasive species; meta-analysis; sea level; species diversity; taxonomy; vascular plant; Iceland; Tracheophyta			Aikio, Sami, Lag-phases in alien plant invasions: Separating the facts from the artefacts, Oikos, 119, 2, pp. 370-378, (2010); Arévalo, José Ramón, Distribution of alien vs. native plant species in roadside communities along an altitudinal gradient in Tenerife and Gran Canaria (Canary Islands), Perspectives in Plant Ecology, Evolution and Systematics, 7, 3, pp. 185-202, (2005); Babington, Charles…								3672530		FLRAB		English	Article	Final		Scopus	2-s2.0-84887609395
J., Heubes, Jonathan; M., Schmidt, Marco; B., Stuch, Benjamin; J.R., García-Màrquez, Jaime Ricardo; R., Wittig, Rüdiger; G., Zizka, Georg; A.M.E., Thiombiano, Adjima M.Emmanuel; B.A., Sinsin, Brice Augustin; R., Schaldach, Rüdiger; K., Hahn, Karen	Heubes, Jonathan (36632167700); Schmidt, Marco (56390517900); Stuch, Benjamin (55746262200); García-Màrquez, Jaime Ricardo (26029036300); Wittig, Rüdiger (56274833300); Zizka, Georg (55904249700); Thiombiano, Adjima M.Emmanuel (9535969800); Sinsin, Brice Augustin (55571235800); Schaldach, Rüdiger (14036164200); Hahn, Karen (36660913900)	36632167700; 56390517900; 55746262200; 26029036300; 56274833300; 55904249700; 9535969800; 55571235800; 14036164200; 36660913900	The projected impact of climate and land use change on plant diversity: Anexample from West Africa	2013	Journal of Arid Environments	96			48	54	0	58	10.1016/j.jaridenv.2013.04.008	https://www.scopus.com/inward/record.uri?eid=2-s2.0-84878126998&doi=10.1016%2Fj.jaridenv.2013.04.008&partnerID=40&md5=3157890c631f9835e969270238d95c7c	Senckenberg Biodiversität und Klima Forschungszentrum, Frankfurt am Main, Germany; Goethe-Universität Frankfurt am Main, Frankfurt am Main, Germany; Senckenberg Forschungsinstitut und Naturmuseum, Frankfurt am Main, Germany; Universität Kassel, Kassel, Germany; Carbones del Cerrejón Limited (El Cerrejón), Bogota, Colombia; University of Ouagadougou, Ouagadougou, Burkina Faso; University of Abomey…	Heubes, Jonathan, Senckenberg Biodiversität und Klima Forschungszentrum, Frankfurt am Main, Germany, Institute of Ecology, Evolution and Diversity, Goethe-Universität Frankfurt am Main, Frankfurt am Main, Germany; Schmidt, Marco, Senckenberg Biodiversität und Klima Forschungszentrum, Frankfurt am Main, Germany, Institute of Ecology, Evolution and Diversity, Goethe-Universität Frankfurt am Main, F…	In West Africa, plant diversity is threatened by future climate and land use change, however, synergistic forecasts for this area are lacking to date. We investigated the impact and the interplay of future (2050) climate and land use change on plant diversity in Burkina Faso, which covers the major bioclimatic gradient in West Africa. Thus, regions with different levels of species richness can be…	Biodiversity; Burkina Faso; Presence-only Data; Sahel; Savanna; Species Distribution Modeling; Bioclimatology; Climate Change; Climate Effect; Climate Modeling; Humid Environment; Land Use Change; Latitude; Plant Community; Simulation; Species Richness; Tropical Region; Burkina Faso; West Africa	bioclimatology; climate change; climate effect; climate modeling; humid environment; land use change; latitude; plant community; simulation; species richness; tropical region; Burkina Faso; West Africa			African Plants Database Version 3 3 3, (2011); Araújo, Miguel B., Reducing uncertainty in projections of extinction risk from climate change, Global Ecology and Biogeography, 14, 6, pp. 529-538, (2005); Augusseau, Xavier, Tree biodiversity, land dynamics and farmers' strategies on the agricultural frontier of southwestern Burkina Faso, Biodiversity and Conservation, 15, 2, pp. 613-630, (2006); Bo…								01401963; 1095922X		JAEND		English	Article	Final		Scopus	2-s2.0-84878126998
I., Venevskaia, Irina; S.V., Venevsky, Sergey V.; C.D., Thomas, Chris D.	Venevskaia, Irina (8202882600); Venevsky, Sergey V. (6602666346); Thomas, Chris D. (7404413845)	8202882600; 6602666346; 7404413845	Projected latitudinal and regional changes in vascular plant diversity through climate change: Short-term gains and longer-term losses	2013	Biodiversity and Conservation	22	2025-07-06		1467	1483	0	9	10.1007/s10531-013-0486-4	https://www.scopus.com/inward/record.uri?eid=2-s2.0-84878661509&doi=10.1007%2Fs10531-013-0486-4&partnerID=40&md5=2fe4529da734afbdfcd15a83ea9e1c89	University of York, York, United Kingdom; Tsinghua University, Beijing, China	Venevskaia, Irina, Department of Biology, University of York, York, United Kingdom; Venevsky, Sergey V., Center for Earth System Science, Tsinghua University, Beijing, China; Thomas, Chris D., Department of Biology, University of York, York, United Kingdom	A simple approach is suggested to project potential changes in the diversity of vascular plants. We use the current (recent past) relationship between plant diversity and geographic variation in the climate, as well as elevation range, to project changes in regional species richness (at 100 × 100 km resolution), concentrating on six climate scenarios for 2020, 2050 and 2080. The results show an o…	Climate Change; Equilibrium Trajectories; Global Plant Diversity; Species-energy Relationship; Climate Change; Dicotyledon; Elevation; Geographical Variation; Latitudinal Gradient; Plant Community; Species Richness; Tracheophyta	climate change; dicotyledon; elevation; geographical variation; latitudinal gradient; plant community; species richness; Tracheophyta			Geothermy of Permafrost Zone in the Lithosphere of the Northern Asia, (1991); Chapin, F. Stuart, Biotic control over the functioning of ecosystems, Science, 277, 5325, pp. 500-504, (1997); Devi, Nadezhda M., Expanding forests and changing growth forms of Siberian larch at the Polar Urals treeline during the 20th century, Global Change Biology, 14, 7, pp. 1581-1591, (2008); Dullinger, Stefan, Exti…								09603115; 15729710		BONSE		English	Article	Final		Scopus	2-s2.0-84878661509
M.R., Fernández Calzado, María Rosa; J., Molero-Mesa, Joaquín; A., Merzouki, Abderrahmane; M.L., Casares-Porcel, Manuel L.	Fernández Calzado, María Rosa (55027359300); Molero-Mesa, Joaquín (57195933215); Merzouki, Abderrahmane (7004108472); Casares-Porcel, Manuel L. (6508193529)	55027359300; 57195933215; 7004108472; 6508193529	Vascular plant diversity and climate change in the upper zone of Sierra Nevada, Spain	2012	Plant Biosystems	146	4		1044	1053	0	29	10.1080/11263504.2012.710273	https://www.scopus.com/inward/record.uri?eid=2-s2.0-84869475057&doi=10.1080%2F11263504.2012.710273&partnerID=40&md5=eebe7b13c19f05f4b38400c699049949	Universidad de Granada, Facultad de Farmacia, Granada, Spain	Fernández Calzado, María Rosa, Department of Botany, Universidad de Granada, Facultad de Farmacia, Granada, Spain; Molero-Mesa, Joaquín, Department of Botany, Universidad de Granada, Facultad de Farmacia, Granada, Spain; Merzouki, Abderrahmane, Department of Botany, Universidad de Granada, Facultad de Farmacia, Granada, Spain; Casares-Porcel, Manuel L., Department of Botany, Universidad de Granad…	This study examines the effects of altitudinal, temperature and aspect gradients on vascular plant species richness on mountain tops in Sierra Nevada (Spain) at different spatial scales (1 m2 quadrats, plot clusters of 4 m2, upper summit area down to the 5-m contour line, entire summit down to the 10-m contour line). The methodology follows the Global Observation Research Initiative in Alpine Env…	Altitude Gradient; Biodiversity; Climate Change; Endemics Plants; Mountain; Temperature; Tracheophyta	Tracheophyta			Araújo, Miguel B., Validation of species-climate impact models under climate change, Global Change Biology, 11, 9, pp. 1504-1513, (2005); Araújo, Miguel B., Reducing uncertainty in projections of extinction risk from climate change, Global Ecology and Biogeography, 14, 6, pp. 529-538, (2005); Blanca, G., Threatened vascular flora of sierra nevada (southern spain), Biological Conservation, 85, 3, …								11263504; 17245575		GBOIA		English	Article	Final		Scopus	2-s2.0-84869475057
K.K., Ratha, Kshirod Kumar; S.S., Mishra, Sthiti Sruajani; J.C., Arya, J. C.; G.C., Joshi, Girish Chandra	Ratha, Kshirod Kumar (56106836600); Mishra, Sthiti Sruajani (56106752300); Arya, J. C. (56106730800); Joshi, Girish Chandra (7103298777)	56106836600; 56106752300; 56106730800; 7103298777	Impact of climate change on diversity of himalayan medicinal plant: A threat to ayurvedic system of medicine	2012	International Journal of Research in Ayurveda and Pharmacy	3	3		327	331	0	23		https://www.scopus.com/inward/record.uri?eid=2-s2.0-84896811900&partnerID=40&md5=9a466a7f6ab6c5a9f6e8ca2ebf67d2a4	CCRAS, Almora, India; Government Ayurveda College, Tripunithura, India; CCRAS, Almora, India; CCRAS, Almora, India	Ratha, Kshirod Kumar, Regional Research Institute of Himalayan Flora, CCRAS, Almora, India; Mishra, Sthiti Sruajani, Government Ayurveda College, Tripunithura, India; Arya, J. C., Regional Research Institute of Himalayan Flora, CCRAS, Almora, India; Joshi, Girish Chandra, Regional Research Institute of Himalayan Flora, CCRAS, Almora, India	Climate change and global warming are well acknowledged threats today, which affected the whole world biodiversity. Review of the literature revealed that regions with higher elevations are more vulnerable to the bad effect of climate change. The Indian Himalayan region, one among the mega hot spot of biodiversity is also the repository of valuable medicinal plants described in Ayurveda. Due to c…	Ayurvedic Medicine; Climate Change; Himalayan Medicinal Plants; Alpine Ecosystem; Altitude; Ayurveda; Biodiversity; Climate Change; Ecosystem; Environmental Protection; Geographic Elevation; Habitat Fragmentation; India; Medicinal Plant; Metabolite; Nonhuman; Phenology; Review; Species Conservation; Species Diversity; Species Invasion; Vegetation	alpine ecosystem; altitude; Ayurveda; biodiversity; climate change; ecosystem; environmental protection; geographic elevation; habitat fragmentation; India; medicinal plant; metabolite; nonhuman; phenology; review; species conservation; species diversity; species invasion; vegetation			undefined, (2010); undefined, (1983); Dravyaguna Vijnan, (2004); undefined, (1983); Setting Priorities for Conservation of Medicinal Plants A Case Study in the Indian, (2002); Journal of Medicinal and Aromatic Plant Sciences, (2000); Medicinal Plants of Indian Himalaya Diversity Distribution Potential Values, (1998); Hima Paryavaran, (2008); Med Plants, (2009); Medicinal Plants Diversity and Cons…								22293566; 22774343				English	Review	Final		Scopus	2-s2.0-84896811900
C.R., Gosper, Carl R.; C.J., Yates, Colin J.; S.M., Prober, Suzanne Mary; B.C., Parsons, Blair C.	Gosper, Carl R. (9532565400); Yates, Colin J. (35567453600); Prober, Suzanne Mary (6602365069); Parsons, Blair C. (24776459400)	9532565400; 35567453600; 6602365069; 24776459400	Contrasting changes in vegetation structure and diversity with time since fire in two Australian Mediterranean-climate plant communities	2012	Austral Ecology	37	2		164	174	0	57	10.1111/j.1442-9993.2011.02259.x	https://www.scopus.com/inward/record.uri?eid=2-s2.0-84858867043&doi=10.1111%2Fj.1442-9993.2011.02259.x&partnerID=40&md5=cdf612248eb01b164a52278e20936b0a	Department of Environment and Conservation Western Australia, Perth, Australia; Commonwealth Scientific and Industrial Research Organisation, Canberra, Australia; The University of Western Australia, Perth, Australia; Outback Ecology, Jolimont, Australia	Gosper, Carl R., Department of Environment and Conservation Western Australia, Perth, Australia, Commonwealth Scientific and Industrial Research Organisation, Canberra, Australia; Yates, Colin J., Department of Environment and Conservation Western Australia, Perth, Australia; Prober, Suzanne Mary, Commonwealth Scientific and Industrial Research Organisation, Canberra, Australia; Parsons, Blair C.…	Mallee-heath and mallee communities occur in a mosaic across large areas of south-western Australia, in topographically subdued and fire-prone landscapes. Consequently, it could be expected that these communities would have historically experienced similar fire regimes, and would respond similarly to variation in aspects of the fire regime. We studied the response of mallee-heath and mallee to ti…	Fire Interval; Initial Floristic Composition; Mallee; Senescence; Succession; Carbon Sequestration; Floristics; Habitat Fragmentation; Habitat Management; Mediterranean Environment; Plant Community; Senescence; Shrub; Species Diversity; Succession; Topographic Mapping; Vegetation Structure; Australia; Eucalyptus	carbon sequestration; floristics; habitat fragmentation; habitat management; Mediterranean environment; plant community; senescence; shrub; species diversity; succession; topographic mapping; vegetation structure; Australia; Eucalyptus			Álvarez, Rebeca, Spatial and temporal patterns in structure and diversity of Mediterranean forest of Quercus pyrenaica in relation to fire, Forest Ecology and Management, 257, 7, pp. 1596-1602, (2009); Vegetation of the Dongara Area Western Australia, (1976); Bell, David T., Post‐fire succession in the northern jarrah forest of Western Australia, Australian Journal of Ecology, 5, 1, pp. 9-14, (19…								14429985		AUECF		English	Article	Final		Scopus	2-s2.0-84858867043
H.F., van Dobben, Hans F.; P.A., Slim, Pieter A.	van Dobben, Hans F. (6603842703); Slim, Pieter A. (6506986962)	6603842703; 6506986962	Past and future plant diversity of a coastal wetland driven by soil subsidence and climate change	2012	Climatic Change	110	2025-04-03		597	618	0	15	10.1007/s10584-011-0118-5	https://www.scopus.com/inward/record.uri?eid=2-s2.0-84856225389&doi=10.1007%2Fs10584-011-0118-5&partnerID=40&md5=b517fdffb4748705601d384357941b0b	Wageningen University & Research, Wageningen, Netherlands	van Dobben, Hans F., Alterra, Wageningen University & Research, Wageningen, Netherlands; Slim, Pieter A., Alterra, Wageningen University & Research, Wageningen, Netherlands	On the island of Ameland (The Netherlands), natural gas has been extracted from a dune and salt marsh natural area since 1986. This has caused a soil subsidence of c. 1-25 cm, which can be used as a model to infer effects of future sea level rise. The aims of our study were (a) to relate the changes in the vegetation, and more specifically, in plant diversity, during the extraction period to soil…	Coastal Wetlands; Mean Sea Level; Multiple Regressions; Natural Areas; Netherlands; Observation Period; Oscillatory Components; Plant Diversity; Regression Model; Salt Marshes; Sea Level Rise; Simultaneous Observation; Soil Chemistry; Vegetation Composition; Eutrophication; Geologic Models; Groundwater; Regression Analysis; Sea Level; Soils; Subsidence; Vegetation; Wetlands; Climate Change; Clima…	Coastal wetlands; Mean sea level; Multiple regressions; Natural areas; Netherlands; Observation Period; Oscillatory components; Plant diversity; Regression model; Salt marshes; Sea level rise; Simultaneous observation; Soil chemistry; Vegetation composition; Eutrophication; Geologic models; Groundwater; Regression analysis; Sea level; Soils; Subsidence; Vegetation; Wetlands; Climate change; clima…			Aptroot, André, The role of cattle in maintaining plant species diversity in wet dune valleys, Biodiversity and Conservation, 16, 5, pp. 1541-1550, (2007); Lutra, (2004); Climate Change 2001 the Scientific Basis, (2001); Flora and Vegetation of the Wadden Sea Islands and Coastal Areas, (1983); Monitoring Effecten Van Bodemdaling Op Ameland Oost, (2005); Analysing Ecological Data, (2007); Acta Bot…								15731480; 01650009	9780444533012	CLCHD		English	Article	Final	All Open Access; Hybrid Gold Open Access	Scopus	2-s2.0-84856225389
G.E., Beatty, Gemma E.; J., Provan, Jim	Beatty, Gemma E. (22955432000); Provan, Jim (7005744954)	22955432000; 7005744954	Comparative phylogeography of two related plant species with overlapping ranges in Europe, and the potential effects of climate change on their intraspecific genetic diversity	2011	BMC Evolutionary Biology	11	1	29			0	36	10.1186/1471-2148-11-29	https://www.scopus.com/inward/record.uri?eid=2-s2.0-79251547379&doi=10.1186%2F1471-2148-11-29&partnerID=40&md5=6fcf5b0b043ce0eb9f4d3ab9af4b0b7b	Queen's University Belfast, Belfast, United Kingdom	Beatty, Gemma E., School of Biological Sciences, Queen's University Belfast, Belfast, United Kingdom; Provan, Jim, School of Biological Sciences, Queen's University Belfast, Belfast, United Kingdom	Background: The aim of the present study was to use a combined phylogeographic and species distribution modelling approach to compare the glacial histories of two plant species with overlapping distributions, Orthilia secunda (one-sided wintergreen) and Monotropa hypopitys (yellow bird's nest). Phylogeographic analysis was carried out to determine the distribution of genetic variation across the …	Climate Change; Comparative Study; Dicotyledon; Genetic Marker; Genetic Variation; Herb; Last Glacial Maximum; Paleobiogeography; Phylogeography; Europe; Aves; Monotropa Hypopitys; Orthilia Secunda; Microsatellite Dna; Adaptation; Article; Biological Model; Classification; Ecosystem; Ericaceae; Genetic Variability; Genetics; Molecular Genetics; Phylogeny; Physiology; Adaptation, Physiological; Cl…	climate change; comparative study; dicotyledon; genetic marker; genetic variation; herb; Last Glacial Maximum; paleobiogeography; phylogeography; Europe; Aves; Monotropa hypopitys; Orthilia secunda; microsatellite DNA; adaptation; article; biological model; classification; ecosystem; Ericaceae; genetic variability; genetics; molecular genetics; phylogeny; physiology; Adaptation, Physiological; Cl…			Emiliani, Cesare, Quaternary paleotemperatures and the duration of the high-temperature intervals, Science, 178, 4059, pp. 398-401, (1972); Winograd, Isaac J., A 250,000-year climatic record from great basin vein calcite: Implications for Milankovitch theory, Science, 242, 4883, pp. 1275-1280, (1988); Jansen, Eystein, Reconstruction of glaciation over the past 6 Myr from ice-borne deposits in the…								14712148			21272309	English	Article	Final	All Open Access; Gold Open Access; Green Final Open Access; Green Open Access	Scopus	2-s2.0-79251547379
C., Brochmann, Christian; M.E., Edwards, Mary E.; I.G., Alsos, Inger Greve	Brochmann, Christian (6603692263); Edwards, Mary E. (7402846040); Alsos, Inger Greve (6602300696)	6603692263; 7402846040; 6602300696	The dynamic past and future of arctic vascular plants: Climate change, spatial variation and genetic diversity	2011					133	152	0	17	10.1017/CBO9781139095075.015	https://www.scopus.com/inward/record.uri?eid=2-s2.0-84924113494&doi=10.1017%2FCBO9781139095075.015&partnerID=40&md5=612acf11eb6e37ace18ba07f40cb1ec5	Universitetet i Oslo, Oslo, Norway; University of Southampton, Southampton, United Kingdom; UiT Norges Arktiske Universitet, Tromso, Norway	Brochmann, Christian, National Centre for Biosystematics, Universitetet i Oslo, Oslo, Norway; Edwards, Mary E., University of Southampton, Southampton, United Kingdom; Alsos, Inger Greve, UiT Norges Arktiske Universitet, Tromso, Norway	The Arctic lies at a global extreme of human impact as well as climatic gradients. Human population density is low. Climate precludes agriculture in all areas but the southernmost ones, and hunting and reindeer husbandry have been the traditional ways of life. More recently coal, oil and gas exploitation and associated infrastructure have affected the vegetation locally and led to species introdu…					Abbott, RICHARD J., History and evolution of the arctic flora: In the footsteps of Eric Hultén, Molecular Ecology, 12, 2, pp. 299-313, (2003); Abbott, RICHARD J., Molecular analysis of plant migration and refugia in the Arctic, Science, 289, 5483, pp. 1343-1346, (2000); Arctic Climate Impact Assessment, (2005); Alsos, Inger Greve, Impact of ice ages on circumpolar molecular diversity: Insights fr…		Cambridge University Press							9781139095075; 9781107019614			English	Book chapter	Final		Scopus	2-s2.0-84924113494
W.D., Kissling, Wilm Daniel; R.G., Field, Richard G.; H., Korntheuer, Heiko; U., Heyder, Ursula; K., Böhning-Gaese, Katrin	Kissling, Wilm Daniel (59157669600); Field, Richard G. (55697347700); Korntheuer, Heiko (36554488600); Heyder, Ursula (16306974700); Böhning-Gaese, Katrin (7004273617)	59157669600; 55697347700; 36554488600; 16306974700; 7004273617	Woody plants and the prediction of climate-change impacts on bird diversity	2010	Philosophical Transactions of the Royal Society B: Biological Sciences	365	1549		2035	2045	0	72	10.1098/rstb.2010.0008	https://www.scopus.com/inward/record.uri?eid=2-s2.0-77954754618&doi=10.1098%2Frstb.2010.0008&partnerID=40&md5=636c86aaf7a97e1f6b9c01e99beadef8	Johannes Gutenberg-Universität Mainz, Mainz, Germany; University of Nottingham, Nottingham, United Kingdom; Potsdam Institut fur Klimafolgenforschung, Potsdam, Germany	Kissling, Wilm Daniel, Department of Ecology, Johannes Gutenberg-Universität Mainz, Mainz, Germany, ; Field, Richard G., School of Geography, University of Nottingham, Nottingham, United Kingdom; Korntheuer, Heiko, Department of Ecology, Johannes Gutenberg-Universität Mainz, Mainz, Germany; Heyder, Ursula, Potsdam Institute, Potsdam Institut fur Klimafolgenforschung, Potsdam, Germany; Böhning-Gae…	Current methods of assessing climate-induced shifts of species distributions rarely account for species interactions and usually ignore potential differences in response times of interacting taxa to climate change. Here, we used species-richness data from 1005 breeding bird and 1417 woody plant species in Kenya and employed model-averaged coefficients from regression models and median climatic fo…	Biodiversity Change; Biotic Interactions; Climate-change Impacts; General Circulation Model; Predictive Model; Uncertainty; Biachellaite; Biotic Factor; Breeding Population; Climate Change; General Circulation Model; Geographical Distribution; Species Diversity; Woody Plant; Kenya; Animal; Biodiversity; Bird; Comparative Study; Ecosystem; Growth, Development And Aging; Plant Development; Season; …	biachellaite; biotic factor; breeding population; climate change; general circulation model; geographical distribution; species diversity; woody plant; Kenya; animal; biodiversity; bird; comparative study; ecosystem; growth, development and aging; plant development; season; theoretical model; Animals; Biodiversity; Birds; Climate Change; Ecosystem; Models, Theoretical; Plant Development; Seasons			Araújo, Miguel B., The importance of biotic interactions for modelling species distributions under climate change, Global Ecology and Biogeography, 16, 6, pp. 743-753, (2007); Araújo, Miguel B., Ensemble forecasting of species distributions, Trends in Ecology and Evolution, 22, 1, pp. 42-47, (2007); Araújo, Miguel B., How does climate change affect biodiversity?, Science, 313, 5792, pp. 1396-1397…		Royal Society						09628436; 14712970		PTRBA	20513712	English	Article	Final	All Open Access; Green Final Open Access; Green Open Access	Scopus	2-s2.0-77954754618
J.C., Svenning, Jens Christian; S., Normand, Signe; F., Skov, Flemming	Svenning, Jens Christian (55010991900); Normand, Signe (8629755300); Skov, Flemming (7003350049)	55010991900; 8629755300; 7003350049	Plio-Pleistocene climate change and geographic heterogeneity in plant diversity-environment relationships	2009	Ecography	32	1		13	21	0	42	10.1111/j.1600-0587.2008.05732.x	https://www.scopus.com/inward/record.uri?eid=2-s2.0-63849158619&doi=10.1111%2Fj.1600-0587.2008.05732.x&partnerID=40&md5=01ac22d74aea20371f99984c770617c9	Aarhus Universitet, Aarhus, Denmark; Aarhus Universitet, Aarhus, Denmark	Svenning, Jens Christian, Department of Biological Sciences, Aarhus Universitet, Aarhus, Denmark; Normand, Signe, Department of Biological Sciences, Aarhus Universitet, Aarhus, Denmark; Skov, Flemming, Department of Wildlife Ecology and Biodiversity, Aarhus Universitet, Aarhus, Denmark	Plio-Pleistocene climate change may have induced geographic heterogeneity in plant species richness-environment relationships in Europe due to greater in situ species survival and speciation rates in southern Europe. We formulate distinct hypotheses on how Plio-Pleistocene climate change may have affected richness-topographic heterogeneity and richness-water-energy availability relationships, cau…	Climate Change; Evapotranspiration; Heterogeneity; Macroecology; Pleistocene; Regression Analysis; Speciation (biology); Species Richness; Survival; Eurasia; Europe; Southern Europe	climate change; evapotranspiration; heterogeneity; macroecology; Pleistocene; regression analysis; speciation (biology); species richness; survival; Eurasia; Europe; Southern Europe			Journal of the Japanese Society of Photogrammetry and Remote Sensing, (1994); J Jpn Soc Photogramm Remote Sensing, (1994); Araújo, Miguel B., Quaternary climate changes explain diversity among reptiles and amphibians, Ecography, 31, 1, pp. 8-15, (2008); Bennett, K. D., Quaternary refugia of north European trees, Journal of Biogeography, 18, 1, pp. 103-115, (1991); Birks, Hillary John Betteley, St…								16000587; 09067590		ECOGE		English	Article	Final		Scopus	2-s2.0-63849158619
C.F., Randin, Christophe François; R., Engler, Robin; P.B., Pearman, Peter B.; P., Vittoz, Pascal; A.A., Guisan, Antoine A.	Randin, Christophe François (13410953200); Engler, Robin (23466174200); Pearman, Peter B. (6603935431); Vittoz, Pascal (6602108536); Guisan, Antoine A. (6603412393)	13410953200; 23466174200; 6603935431; 6602108536; 6603412393	Using georeferenced databases to assess the effect of climate change on alpine plant species and diversity	2009					149	163	0	10	10.1201/9781420083705	https://www.scopus.com/inward/record.uri?eid=2-s2.0-84870929874&doi=10.1201%2F9781420083705&partnerID=40&md5=366ce6f4e11f7ea3000bb451a6d23ad9	Université de Lausanne (UNIL), Lausanne, Switzerland; Université de Lausanne (UNIL), Lausanne, Switzerland; Université de Lausanne (UNIL), Lausanne, Switzerland; Université de Lausanne (UNIL), Lausanne, Switzerland; Eidgenössische Forschungsanstalt für Wald, Schnee und Landschaft WSL, Birmensdorf, Switzerland	Randin, Christophe François, Université de Lausanne (UNIL), Lausanne, Switzerland; Engler, Robin, Department of Ecology and Evolution, Université de Lausanne (UNIL), Lausanne, Switzerland; Pearman, Peter B., Université de Lausanne (UNIL), Lausanne, Switzerland; Vittoz, Pascal, Université de Lausanne (UNIL), Lausanne, Switzerland; Guisan, Antoine A., Department of Ecology and Evolution, Université…	During the last two decades, evidence of global warming has accumulated, with a + 0.76°C temperature increase on average between 1850-1899 and 2001-2005 for the Earth (0.57°C to 0.95°C; IPCC, 2007). There is now very high confi dence that this warming results from the parallel increase in carbon dioxide from a preindustrial value of 280 ppm to 379 ppm in 2005, at a rate that is one hundred times …					Flora Alpina, (2004); Akaike, Hirotsugu, Maximum likelihood identification of gaussian autoregressive moving average models, Biometrika, 60, 2, pp. 255-265, (1973); Araújo, Miguel B., Ensemble forecasting of species distributions, Trends in Ecology and Evolution, 22, 1, pp. 42-47, (2007); Bakkenes, Michel, Assessing effects of forecasted climate change on the diversity and distribution of Europea…		CRC Press							9781420083699; 9781420083705			English	Book chapter	Final		Scopus	2-s2.0-84870929874
F.I., Woodward, F. Ian; C.K., Kelly, Colleen K.	Woodward, F. Ian (7005902678); Kelly, Colleen K. (7401583782)	7005902678; 7401583782	Responses of global plant diversity capacity to changes in carbon dioxide concentration and climate	2008	Ecology Letters	11	11		1229	1237	0	54	10.1111/j.1461-0248.2008.01240.x	https://www.scopus.com/inward/record.uri?eid=2-s2.0-55949110032&doi=10.1111%2Fj.1461-0248.2008.01240.x&partnerID=40&md5=b67b4b1c978ec68c1990968dd6f08eb8	The University of Sheffield, Sheffield, United Kingdom; University of Oxford, Oxford, United Kingdom	Woodward, F. Ian, Department of Animal and Plant Sciences, The University of Sheffield, Sheffield, United Kingdom; Kelly, Colleen K., Department of Zoology, University of Oxford, Oxford, United Kingdom	We model plant species diversity globally by country to show that future plant diversity capacity has a strong dependence on changing climate and carbon dioxide concentration. CO<inf>2</inf> increase, through its impact on net primary production and warming is predicted to increase regional diversity capacity, while warming with constant CO<inf>2</inf> leads to decreases in diversity capacity. In…	Carbon Dioxide; Climate; Climatic Change; Plant Diversity; Species Area Relation; Carbon Dioxide; Carbon Dioxide; Carbon Dioxide; Climate Effect; Community Response; Concentration (composition); Land Use; Plant Community; Primary Production; Species Diversity; Species-area Relationship; Warming; Article; Atmosphere; Biodiversity; Biological Model; Chemistry; Climate; Forecasting; Greenhouse Effec…	carbon dioxide; climate effect; community response; concentration (composition); land use; plant community; primary production; species diversity; species-area relationship; warming; article; atmosphere; biodiversity; biological model; chemistry; climate; forecasting; greenhouse effect; plant; Atmosphere; Biodiversity; Carbon Dioxide; Climate; Forecasting; Greenhouse Effect; Models, Biological; P…		carbon dioxide, 124-38-9, 58561-67-4; Carbon Dioxide, 124-38-9	Barthlott, Wilhelm, Geographic patterns of vascular plant diversity at continental to global scales, Erdkunde, 61, 4, pp. 305-315, (2007); Bernadzki, Eugeniusz, Compositional dynamics of natural forests in the Bialowieza National Park, northeastern Poland, Journal of Vegetation Science, 9, 2, pp. 229-238, (1998); Caley, Peter A., Estimating the invasion success of introduced plants, Diversity and…								1461023X; 14610248		ECLEF	18803643	English	Article	Final		Scopus	2-s2.0-55949110032
C.M., Pickering, Catherine Marina; W., Hill, Wendy; K., Green, Ken	Pickering, Catherine Marina (7102584068); Hill, Wendy (7202970560); Green, Ken (55882815500)	7102584068; 7202970560; 55882815500	Vascular plant diversity and climate change in the alpine zone of the Snowy Mountains, Australia	2008	Biodiversity and Conservation	17	7		1627	1644	0	71	10.1007/s10531-008-9371-y	https://www.scopus.com/inward/record.uri?eid=2-s2.0-46249096059&doi=10.1007%2Fs10531-008-9371-y&partnerID=40&md5=f702f6a881674426a642dc67b84d499b	Griffith University, Brisbane, Australia; NSW National Parks and Wildlife Service, Sydney, Australia	Pickering, Catherine Marina, School of Environment, Griffith University, Brisbane, Australia; Hill, Wendy, School of Environment, Griffith University, Brisbane, Australia; Green, Ken, NSW National Parks and Wildlife Service, Sydney, Australia	This study examines vascular plant species richness along an altitudinal gradient in alpine Australia. Vascular plant composition and soil temperature records were obtained for five summits (from 1729 m to 2114 m a.s.l.) using sampling protocols from the Global Observation Research Initiative in Alpine Environments program. Species richness was examined against altitude, aspect and climatic varia…	Alpine Zone; Altitude Gradient; Climate Change; Endemics; Exotics; Weeds; Alpine Environment; Altitudinal Zonation; Climate Change; Community Composition; Endemic Species; Extinction Risk; Soil Temperature; Species Diversity; Species Richness; Vascular Plant; Weed; Australasia; Australia; Australian Alps; Snowy Mountains; Tracheophyta	alpine environment; altitudinal zonation; climate change; community composition; endemic species; extinction risk; soil temperature; species diversity; species richness; vascular plant; weed; Australasia; Australia; Australian Alps; Snowy Mountains; Tracheophyta			Cunninghamia, (2006); Archivio Geobotanico, (2001); Scientific Significance of the Australian Alps, (1989); Coldea, Gheorghe, Floristic diversity in relation to geomorphological and climatic factors in the subalpine-alpine belt of the Rodna Mountains (the Romanian Carpathians), Pirineos, 158-159, pp. 61-72, (2004); Scientific Significance of the Australian Alps, (1989); Kosciusko Alpine Flora, (1…								09603115; 15729710		BONSE		English	Article	Final		Scopus	2-s2.0-46249096059
G.F., Midgley, Guy F.; W., Thuiller, Wilfried	Midgley, Guy F. (7006003164); Thuiller, Wilfried (6602123683)	7006003164; 6602123683	Potential vulnerability of Namaqualand plant diversity to anthropogenic climate change	2007	Journal of Arid Environments	70	4		615	628	0	61	10.1016/j.jaridenv.2006.11.020	https://www.scopus.com/inward/record.uri?eid=2-s2.0-34249307441&doi=10.1016%2Fj.jaridenv.2006.11.020&partnerID=40&md5=2c57fdc143c553642ed0e8d727138395	South African National Biodiversity Institute, Pretoria, South Africa; Laboratoire d’Écologie Alpine (LECA), Grenoble, France	Midgley, Guy F., Climate Change Research Group, South African National Biodiversity Institute, Pretoria, South Africa; Thuiller, Wilfried, Climate Change Research Group, South African National Biodiversity Institute, Pretoria, South Africa, Laboratoire d’Écologie Alpine (LECA), Grenoble, France	We provide a position paper, using a brief literature review and some new modelling results for a subset of succulent plant species, which explores why Namaqualand plant diversity might be particularly vulnerable to anthropogenic climate change despite presumed species resilience under arid conditions, and therefore a globally important test-bed for adaptive conservation strategies. The Pleistoce…	Bioclimatic Modelling; Desert; Drought; Range Shifts; Tolerance Limits; Anthropogenic Effect; Bioclimatology; Climate Change; Climate Effect; Desert; Drought; Modeling; Plant Community; Species Diversity; Tolerance; Vulnerability; Africa; Namaqualand; Southern Africa; Sub-saharan Africa	anthropogenic effect; bioclimatology; climate change; climate effect; desert; drought; modeling; plant community; species diversity; tolerance; vulnerability; Africa; Namaqualand; Southern Africa; Sub-Saharan Africa			10th Medecos Conference, (2004); Araújo, Miguel B., Would climate change drive species out of reserves? An assessment of existing reserve-selection methods, Global Change Biology, 10, 9, pp. 1618-1626, (2004); Balmford, Andrew P., Extinction filters and current resilience: The significance of past selection pressures for conservation biology, Trends in Ecology and Evolution, 11, 5, pp. 193-196, (…								01401963; 1095922X		JAEND		English	Article	Final		Scopus	2-s2.0-34249307441
G., Kazakis, George; D., Ghosn, Dany; I.N., Vogiatzakis, Ioannis N.; V.P., Papanastasis, Vasilios P.	Kazakis, George (14424147300); Ghosn, Dany (14423924200); Vogiatzakis, Ioannis N. (6507949281); Papanastasis, Vasilios P. (6602115343)	14424147300; 14423924200; 6507949281; 6602115343	Vascular plant diversity and climate change in the alpine zone of the Lefka Ori, Crete	2007	Biodiversity and Conservation	16	6		1603	1615	0	93	10.1007/s10531-006-9021-1	https://www.scopus.com/inward/record.uri?eid=2-s2.0-34249656958&doi=10.1007%2Fs10531-006-9021-1&partnerID=40&md5=d3fae3816f3e99ff1c35de0087198e9e	Mediterranean Agronomic Institute of Chania, Chania, Greece; University of Reading, Reading, United Kingdom; Aristotle University of Thessaloniki, Thessaloniki, Greece	Kazakis, George, Department of Environmental Management, Mediterranean Agronomic Institute of Chania, Chania, Greece; Ghosn, Dany, Department of Environmental Management, Mediterranean Agronomic Institute of Chania, Chania, Greece; Vogiatzakis, Ioannis N., Centre for Agri-Environmental Research, University of Reading, Reading, United Kingdom; Papanastasis, Vasilios P., Laboratory of Rangeland Eco…	The aim of this study is to analyse the vascular flora and the local climate along an altitudinal gradient in the Lefka Ori massif Crete and to evaluate the potential effects of climate change on the plant diversity of the sub-alpine and alpine zones. It provides a quantitative/qualitative analysis of vegetation-environment relationships for four summits along an altitude gradient on the Lefka Or…	Global Change; Greece; Islands; Mountains; Species Richness; Species Turnover; Alpine Environment; Altitude; Climate Change; Ecotone; Endemic Species; Habitat Availability; Latitudinal Gradient; Species Diversity; Species Richness; Temperature Effect; Vascular Plant; Vegetation Dynamics; Canea; Crete; Eurasia; Europe; Greece; Southern Europe; White Mountains; Tracheophyta	alpine environment; altitude; climate change; ecotone; endemic species; habitat availability; latitudinal gradient; species diversity; species richness; temperature effect; vascular plant; vegetation dynamics; Canea; Crete; Eurasia; Europe; Greece; Southern Europe; White Mountains; Tracheophyta			Report, (2005); Araújo, Miguel B., Would climate change drive species out of reserves? An assessment of existing reserve-selection methods, Global Change Biology, 10, 9, pp. 1618-1626, (2004); Austin, Michael Phillip, Searching for a model for use in vegetation analysis, Vegetatio, 42, 1-3, pp. 11-21, (1980); Austin, Michael Phillip, A new model for the continuum concept, Vegetatio, 83, 1-2, pp. …								09603115; 15729710		BONSE		English	Article	Final		Scopus	2-s2.0-34249656958
C.J., McClean, Colin J.; J.C., Lovett, Jon C.; W., Küper, Wolfgang; L., Hannah, Lee; J.H., Sommer, Jan Henning; W., Barthlott, Wilhelm; M., Termansen, Mette; G.F., Smith, Gideon F.; S., Tokumine, Simon; J.R.D., Taplin, James R.D.	McClean, Colin J. (6603564901); Lovett, Jon C. (57202040889); Küper, Wolfgang (6602574969); Hannah, Lee (57203646144); Sommer, Jan Henning (8680138100); Barthlott, Wilhelm (56246028600); Termansen, Mette (16835466300); Smith, Gideon F. (7406737852); Tokumine, Simon (8680138600); Taplin, James R.D. (7004255374)	6603564901; 57202040889; 6602574969; 57203646144; 8680138100; 56246028600; 16835466300; 7406737852; 8680138600; 7004255374	African plant diversity and climate change	2005	Annals of the Missouri Botanical Garden	92	2		139	152	0	109		https://www.scopus.com/inward/record.uri?eid=2-s2.0-23744449825&partnerID=40&md5=4bcdd93e5419d971088d911f307a7d06	University of York, York, United Kingdom; Universität Bonn, Bonn, Germany; Center for Applied Biodiversity Science, Washington, United States; South African National Biodiversity Institute, Pretoria, South Africa; University of Pretoria, Pretoria, South Africa	McClean, Colin J., Environment Department, University of York, York, United Kingdom; Lovett, Jon C., Environment Department, University of York, York, United Kingdom; Küper, Wolfgang, Nees Institute for Biodiversity of Plants, Universität Bonn, Bonn, Germany; Hannah, Lee, Center for Applied Biodiversity Science, Washington, United States; Sommer, Jan Henning, Nees Institute for Biodiversity of Pl…	International goals have been set to protect global plant diversity and limit ecosystem damage due to climate change, but large-scale effects of changing climate on species distributions have yet to be fully considered in conservation efforts. For sub-Saharan Africa we study the shifts in climatically suitable areas for 5197 African plant species under future climate models for the years 2025, 20…	Africa; Biodiversity; Climate Change; Conservation; Extinction; Global Strategy For Plant Conservation (gspc); Important Plant Areas				Identifying Important Plant Areas, (2002); Aspinall, Richard J., An inductive modelling procedure based on bayes’ theorem for analysis of pattern in spatial data, International Journal of Geographical Information Systems, 6, 2, pp. 105-121, (1992); 2004 Iucn Red List of Threatened Species A Global Species Assessment, (2004); Barthlott, Wilhelm, Terminological and methodological aspects of the map…								266493		AMBGA		English	Article	Final		Scopus	2-s2.0-23744449825
W., Thuiller, Wilfried; S., Lavorel, Sandra; M.B., Araújo, Miguel B.; M.T., Sykes, Martin T.; I.C., Prentice, Iain Colin	Thuiller, Wilfried (6602123683); Lavorel, Sandra (7003422919); Araújo, Miguel B. (7202962622); Sykes, Martin T. (57203257682); Prentice, Iain Colin (7005712332)	6602123683; 7003422919; 7202962622; 57203257682; 7005712332	Climate change threats to plant diversity in Europe	2005	Proceedings of the National Academy of Sciences of the United States of America	102	23		8245	8250	0	2000	10.1073/pnas.0409902102	https://www.scopus.com/inward/record.uri?eid=2-s2.0-20444364191&doi=10.1073%2Fpnas.0409902102&partnerID=40&md5=93704b37678de71be4fb98635aa808aa	CNRS Centre National de la Recherche Scientifique, Paris, France; South African National Biodiversity Institute, Pretoria, South Africa; University of Évora, Evora, Portugal; Laboratoire d’Écologie Alpine (LECA), Grenoble, France; University of Oxford, Oxford, United Kingdom; Institutionen för Naturgeografi och Ekosystemvetenskap, Lunds Universitet, Lund, Sweden; University of Bristol, Bristol, U…	Thuiller, Wilfried, CNRS Centre National de la Recherche Scientifique, Paris, France, Climate Change Research Group, South African National Biodiversity Institute, Pretoria, South Africa, Macroecology and Conservation Unit, University of Évora, Evora, Portugal; Lavorel, Sandra, CNRS Centre National de la Recherche Scientifique, Paris, France, Laboratoire d’Écologie Alpine (LECA), Grenoble, France…	Climate change has already triggered species distribution shifts in many parts of the world. Increasing impacts are expected for the future, yet few studies have aimed for a general understanding of the regional basis for species vulnerability. We projected late 21st century distributions for 1,350 European plants species under seven climate change scenarios. Application of the International Unio…	Intergovernmental Panel On Climate Change Storylines; Niche-based Model; Species Extinction; Species Turnover; Article; Biodiversity; Climate Change; Ecological Niche; Endangered Species; Environmental Planning; Environmental Temperature; Europe; Geographic Distribution; Government; Moisture; Plant; Priority Journal; Southern Europe; Species Distribution; Species Diversity; Species Extinction; Bi…	article; biodiversity; climate change; ecological niche; endangered species; environmental planning; environmental temperature; Europe; geographic distribution; government; moisture; plant; priority journal; Southern Europe; species distribution; species diversity; species extinction; Biodiversity; Greenhouse Effect; Models, Biological; Plant Physiology; Population Dynamics; Rain; Temperature			Edwards, Martin, Impact of climate change on marine pelagic phenology and trophic mismatch, Nature, 430, 7002, pp. 881-884, (2004); Nature, (1996); Hughes, Lesley A., Biological consequences of global warming: Is the signal already apparent?, Trends in Ecology and Evolution, 15, 2, pp. 56-61, (2000); Parmesan, Camille, A globally coherent fingerprint of climate change impacts across natural syste…								10916490; 00278424		PNASA	15919825	English	Article	Final	All Open Access; Green Final Open Access; Green Open Access	Scopus	2-s2.0-20444364191
A., Stanisci, Angela; G., Pelino, Giovanni; C., Blasi, Carlo	Stanisci, Angela (56086811300); Pelino, Giovanni (8510503900); Blasi, Carlo (7003407069)	56086811300; 8510503900; 7003407069	Vascular plant diversity and climate change in the alpine belt of the central Apennines (Italy)	2005	Biodiversity and Conservation	14	6		1301	1318	0	90	10.1007/s10531-004-9674-6	https://www.scopus.com/inward/record.uri?eid=2-s2.0-21144448244&doi=10.1007%2Fs10531-004-9674-6&partnerID=40&md5=6a81fca638f752bfc14fd97088e99239	Università degli Studi del Molise, Campobasso, Italy; Sapienza Università di Roma, Rome, Italy	Stanisci, Angela, Department of Science and Technology for Environment and Territory, Università degli Studi del Molise, Campobasso, Italy; Pelino, Giovanni, Department of Science and Technology for Environment and Territory, Università degli Studi del Molise, Campobasso, Italy; Blasi, Carlo, Dipartimento di Biologia Vegetale, Sapienza Università di Roma, Rome, Italy	The aim of this study is to analyse the vascular flora and the local climate along the altitude gradient in the largest alpine belt of the central Apennines (Majella National Park), and to contribute to the evaluation of the possible effects of global climate changes on the biodiversity of the alpine ecosystem. For this purpose floristic-quantitative analyses and temperature records on three diff…	Alpine Belt; Altitude Gradient; Central Italy; Chorotypes; Global Change; Life Forms; Plant Species Richness And Threat; Alpine Environment; Altitude; Climate Change; Global Change; Species Diversity; Vascular Plant; Apennines; Eastern Hemisphere; Eurasia; Europe; Italy; Southern Europe; World; Tracheophyta	alpine environment; altitude; climate change; global change; species diversity; vascular plant; Apennines; Eastern Hemisphere; Eurasia; Europe; Italy; Southern Europe; World; Tracheophyta			Braun Blanquetia, (1999); Inform Bot Ital, (1977); Global Change and Mountain Regions the Mountain Research Initiative, (2001); Mountain Environments in Changing Climates, (1994); Second Assessment Report of the Intergovernmental Panel on Climate Change Ipcc, (1996); Fitosociologia, (2000); Societa Italiana Di Ecologia Atti, (1996); Boschi D Italia, (1998); Libro De Resumenes of Xviii Jornadas De…								09603115; 15729710		BONSE		English	Article	Final		Scopus	2-s2.0-21144448244
M., Bakkenes, Michel; R., Alkemade, Rob; F., Ihle, Froydis; R., Leemans, Rik; J.B., Latour, Joris B.	Bakkenes, Michel (7801529646); Alkemade, Rob (36981462600); Ihle, Froydis (6506231890); Leemans, Rik (7004379793); Latour, Joris B. (7006522403)	7801529646; 36981462600; 6506231890; 7004379793; 7006522403	Assessing effects of forecasted climate change on the diversity and distribution of European higher plants for 2050	2002	Global Change Biology	8	4		390	407	0	484	10.1046/j.1354-1013.2001.00467.x	https://www.scopus.com/inward/record.uri?eid=2-s2.0-0036250118&doi=10.1046%2Fj.1354-1013.2001.00467.x&partnerID=40&md5=0ac75809ca8a2176888adf271bb6725b	Rijksinstituut voor Volksgezondheid en Milieu, Bilthoven, Netherlands	Bakkenes, Michel, Rijksinstituut voor Volksgezondheid en Milieu, Bilthoven, Netherlands; Alkemade, Rob, Rijksinstituut voor Volksgezondheid en Milieu, Bilthoven, Netherlands; Ihle, Froydis, Rijksinstituut voor Volksgezondheid en Milieu, Bilthoven, Netherlands; Leemans, Rik, Rijksinstituut voor Volksgezondheid en Milieu, Bilthoven, Netherlands; Latour, Joris B., Rijksinstituut voor Volksgezondheid…	The rapidly increasing atmospheric concentrations of greenhouse gases may lead to significant changes in regional and seasonal climate patterns. Such changes can strongly influence the diversity and distribution of species and, therefore, affect ecosystems and biodiversity. To assess these changes we developed a model, called EUROMOVE. The model uses climate data from 1990 to 2050 as compiled fro…	Biodiversity; Climate Change; Kappa Statistic; Multiple Logistic Regression; Climate Change; Ecosystem Modeling; Geographical Distribution; Plant; Species Diversity; Europe; Embryophyta	climate change; ecosystem modeling; geographical distribution; plant; species diversity; Europe; Embryophyta			Alcamo, Joseph M., IMAGE 2.0: integrated modeling of global climate change, (1994); Beerling, David J., Climate and the distribution of Fallopia japonica: use of an introduced species to test the predictive capacity of response surfaces, Journal of Vegetation Science, 6, 2, pp. 269-282, (1995); Journal of Vegetation Science, (1998); Booth, Trevor H., Niche analysis and tree species introduction, …								13541013; 13652486				English	Article	Final		Scopus	2-s2.0-0036250118
T.J., Stohlgren, Thomas J.; A.J., Owen, April J.; M., Lee, Michelle	Stohlgren, Thomas J. (7003657704); Owen, April J. (7202050270); Lee, Michelle (37022711300)	7003657704; 7202050270; 37022711300	Monitoring shifts in plant diversity in response to climate change: A method for landscapes	2000	Biodiversity and Conservation	9	1		65	86	0	53	10.1023/A:1008995726486	https://www.scopus.com/inward/record.uri?eid=2-s2.0-0033953799&doi=10.1023%2FA%3A1008995726486&partnerID=40&md5=f29508a035915ee3ec438b8d36390954	Colorado State University, Fort Collins, United States; Colorado State University, Fort Collins, United States	Stohlgren, Thomas J., Natural Resource Ecology Laboratory, Colorado State University, Fort Collins, United States; Owen, April J., Natural Resource Ecology Laboratory, Colorado State University, Fort Collins, United States; Lee, Michelle, Natural Resource Ecology Laboratory, Colorado State University, Fort Collins, United States	Improved sampling designs are needed to detect, monitor, and predict plant migrations and plant diversity changes caused by climate change and other human activities. We propose a methodology based on multi-scale vegetation plots established across forest ecotones which provide baseline data on patterns of plant diversity, invasions of exotic plant species, and plant migrations at landscape scale…	Exotic Species; Multi-scale Vegetation Sampling; Plant Diversity; Species-environment Relationships; Vegetation Ecotones; Climate Change; Methodology; Monitoring; Species Diversity; United States	climate change; methodology; monitoring; species diversity; United States			Allen, Robert B., Gradient analysis of latitudinal variation in southern Rocky Mountain forests, Journal of Biogeography, 18, 2, pp. 123-139, (1991); Backéus, Ingvar, Ecotone versus ecocline: vegetation zonation and dynamics around a small reservoir in Tanzania, Journal of Biogeography, 20, 2, pp. 209-218, (1993); Baker, William L., Using GIS to model tree population parameters in the Rocky Mount…								09603115; 15729710		BONSE		English	Article	Final		Scopus	2-s2.0-0033953799
Z., Atashgahi, Zohreh; M.B., Erfanian, Mohammad Bagher; H., Moazzeni, Hamid; G., Shemirani, Gelareh; A., Pirani, Atefeh	Atashgahi, Zohreh (57201201573); Erfanian, Mohammad Bagher (57209341216); Moazzeni, Hamid (15750902300); Shemirani, Gelareh (59781445400); Pirani, Atefeh (55034863300)	57201201573; 57209341216; 15750902300; 59781445400; 55034863300	Endemic cushions of the Khorassan-Kopet Dagh floristic province show differential responses to future climate change	2025	Scientific Reports	15	1	16046			0	0	10.1038/s41598-025-00453-0	https://www.scopus.com/inward/record.uri?eid=2-s2.0-105004475070&doi=10.1038%2Fs41598-025-00453-0&partnerID=40&md5=0a1957b4c392c37ba6ab85234e328401	Ferdowsi University of Mashhad, Mashhad, Iran; Ferdowsi University of Mashhad, Mashhad, Iran	Atashgahi, Zohreh, Department of Biology, Ferdowsi University of Mashhad, Mashhad, Iran; Erfanian, Mohammad Bagher, Department of Biology, Ferdowsi University of Mashhad, Mashhad, Iran; Moazzeni, Hamid, Department of Biology, Ferdowsi University of Mashhad, Mashhad, Iran, Herbarium FUMH, Ferdowsi University of Mashhad, Mashhad, Iran; Shemirani, Gelareh, Department of Biology, Ferdowsi University …	Climate change negatively affects mountainous plants and leads to their range contraction or extinction. Cushion plants are the essential components of mountainous ecosystems. Although cushions represent the dominant vegetation form of the mountains of the Irano-Anatolian Biodiversity Hotspot, the impacts of climate change on these plants have been merely studied. The present study investigates t…	Climate Change; Cushion Plants; Irano-turanian; Khorassan-kopet Dagh Floristic Province; Algorithm; Article; Biodiversity; Climate Change; Controlled Study; Habitat; Mountain; Nonhuman; Thymus; Vegetation; Altitude; Ecosystem; Iran; Altitude; Biodiversity; Climate Change; Ecosystem	algorithm; article; biodiversity; climate change; controlled study; habitat; mountain; nonhuman; thymus; vegetation; altitude; ecosystem; Iran; Altitude; Biodiversity; Climate Change; Ecosystem			Perez-Harguindeguy, Natalia, New handbook for standardised measurement of plant functional traits worldwide, Australian Journal of Botany, 61, 3, pp. 167-234, (2013); Badano, Ernesto I., Assessing impacts of ecosystem engineers on community organization: A general approach illustrated by effects of a high-Andean cushion plant, Oikos, 115, 2, pp. 369-385, (2006); Zhang, Yazhou, Diversity patterns …		Nature Research						20452322			40341424	English	Article	Final	All Open Access; Gold Open Access	Scopus	2-s2.0-105004475070
G.A., Backus, Gregory A.; M.B., Rose, Miranda Brooke; S.J.E., Velazco, Santiago José Elías; J., Franklin, Janet; A.D., Syphard, Alexandra D.; H.M., Regan, Helen M.	Backus, Gregory A. (56461082800); Rose, Miranda Brooke (57221553154); Velazco, Santiago José Elías (56543481200); Franklin, Janet (35725372300); Syphard, Alexandra D. (6507891871); Regan, Helen M. (6603947808)	56461082800; 57221553154; 56543481200; 35725372300; 6507891871; 6603947808	Population Decline for Plants in the California Floristic Province: Does Demography or Geography Determine Climate Change Vulnerability?	2025	Diversity and Distributions	31	8	e70067			0	0	10.1111/ddi.70067	https://www.scopus.com/inward/record.uri?eid=2-s2.0-105014096946&doi=10.1111%2Fddi.70067&partnerID=40&md5=8acb8466c7c8700c1f55d00f4d9ef084	University of California, Riverside, Riverside, United States; San Diego State University, San Diego, United States; Consejo Nacional de Investigaciones Científicas y Técnicas, Buenos Aires, Argentina; Conservation Biology Institute, La Mesa, United States	Backus, Gregory A., University of California, Riverside, Riverside, United States; Rose, Miranda Brooke, University of California, Riverside, Riverside, United States, San Diego State University, San Diego, United States; Velazco, Santiago José Elías, Consejo Nacional de Investigaciones Científicas y Técnicas, Buenos Aires, Argentina; Franklin, Janet, San Diego State University, San Diego, United…	Aim: The role of species' demography and geography can be difficult to disentangle when projecting future population decline under global change. By constructing and combining species-specific ecological models for plants in a fire-prone Mediterranean-type ecosystem, we explored how demography and geography can differentially affect population projections of plant species in the coming century. L…	California Floristic Province; Climate Change; Demographic Model; Land-use Change; Mediterranean-type Ecosystem; Plants; Species Distribution Model; Stochastic Model; Wildfire; Climate Change; Habitat Loss; Land Use Change; Life History; Population Decline; Population Dynamics; California; United States	climate change; habitat loss; land use change; life history; population decline; population dynamics; California; United States			Acevedo, Pelayo, Population dynamics affect the capacity of species distribution models to predict species abundance on a local scale, Diversity and Distributions, 23, 9, pp. 1008-1017, (2017); Ackerly, David D., The geography of climate change: Implications for conservation biogeography, Diversity and Distributions, 16, 3, pp. 476-487, (2010); Applied Biomathematics, (2005); Backus, Gregory A., …		John Wiley and Sons Inc						14724642; 13669516		DIDIF		English	Article	Final	All Open Access; Gold Open Access	Scopus	2-s2.0-105014096946
S., Minev-Benzecry, Samuel; B.H., Daru, Barnabas H.	Minev-Benzecry, Samuel (59397834800); Daru, Barnabas H. (55386530700)	59397834800; 55386530700	Climate change alters the future of natural floristic regions of deep evolutionary origins	2024	Nature Communications	15	1	9474			0	5	10.1038/s41467-024-53860-8	https://www.scopus.com/inward/record.uri?eid=2-s2.0-85208291173&doi=10.1038%2Fs41467-024-53860-8&partnerID=40&md5=140c8dea0424799b064b2c328e2b2a20	Stanford University, Stanford, United States	Minev-Benzecry, Samuel, Department of Biology, Stanford University, Stanford, United States; Daru, Barnabas H., Department of Biology, Stanford University, Stanford, United States	Biogeographic regions reflect the organization of biotas over long evolutionary timescales but face alterations from recent anthropogenic climate change. Here, we model species distributions for 189,269 vascular plant species of the world under present and future climates and use this data to generate biogeographic regions based on phylogenetic dissimilarity. Our analysis reveals declines in phyl…	Altitude; Biodiversity; Climate Change; Floristics; Heterogeneity; Human Activity; Phylogenetics; Vascular Plant; Article; Biogeographic Region; Climate; Environmental Temperature; Floristic Region; Himalaya; Human Activities; Multidimensional Scaling; Nonhuman; Paleotropics; Phylogenetic Dissimilarity; Phylogeny; Plant Community; Rocky Mountains; Seasonal Variation; Simpson Index; Species Distri…	altitude; biodiversity; climate change; floristics; heterogeneity; human activity; phylogenetics; vascular plant; Article; biogeographic region; climate; environmental temperature; floristic region; Himalaya; human activities; multidimensional scaling; nonhuman; Paleotropics; phylogenetic dissimilarity; phylogeny; plant community; Rocky Mountains; seasonal variation; Simpson index; species distri…			Geographie Botanique Raisonnee, (1855); Geographical Distribution of Animals, (1876); Olson, David M., Terrestrial ecoregions of the world: A new map of life on Earth, BioScience, 51, 11, pp. 933-938, (2001); Kreft, Holger, A framework for delineating biogeographical regions based on species distributions, Journal of Biogeography, 37, 11, pp. 2029-2053, (2010); Morrone, Juan J., Biogeographical r…		Nature Research						20411723			39488541	English	Article	Final	All Open Access; Gold Open Access; Green Accepted Open Access; Green Open Access	Scopus	2-s2.0-85208291173
E., Movedi, Ermes; S., Bocchi, Stefano; L., Paleari, Livia; F.M., Vesely, Fosco Mattia; I., Vagge, I.; R., Confalonieri, Roberto	Movedi, Ermes (55751671800); Bocchi, Stefano (6603328866); Paleari, Livia (55751046700); Vesely, Fosco Mattia (57196401540); Vagge, I. (14421833900); Confalonieri, Roberto (60095378000)	55751671800; 6603328866; 55751046700; 57196401540; 14421833900; 60095378000	Impacts of climate change on semi-natural alpine pastures productivity and floristic composition	2023	Regional Environmental Change	23	4	159			0	2	10.1007/s10113-023-02158-4	https://www.scopus.com/inward/record.uri?eid=2-s2.0-85177196710&doi=10.1007%2Fs10113-023-02158-4&partnerID=40&md5=0a19fcd0c4309af4dcf4bc7312724d57	Università degli Studi di Milano, Milan, Italy; Università degli Studi di Milano, Milan, Italy; Università degli Studi di Milano, Milan, Italy	Movedi, Ermes, Università degli Studi di Milano, Milan, Italy; Bocchi, Stefano, Università degli Studi di Milano, Milan, Italy; Paleari, Livia, Università degli Studi di Milano, Milan, Italy; Vesely, Fosco Mattia, Università degli Studi di Milano, Milan, Italy; Vagge, I., Università degli Studi di Milano, Milan, Italy; Confalonieri, Roberto, Università degli Studi di Milano, Milan, Italy	Climate change impact on pasture floristic composition needs to be carefully assessed, given its key role for the resilience of pastoral systems and related ecosystem services. Nevertheless, variations in floristic composition are rarely taken into account in climate change impact studies. Here, we used the plant community model CoSMo to simulate future dynamics of biomass accumulation and floris…	Biodiversity; Cosmo; Ecosystem Services; Grassland; Grazing Value; Plant Community				Crop Evapotranspiration Guidelines for Computing Crop Water Requirements, (1998); Argenti, Giovanni, Evolution of production and forage quality in sown meadows of a mountain area inside parmesan cheese consortium, Agronomy Research, 19, 2, pp. 344-356, (2021); Bartolucci, Fabrizio, An updated checklist of the vascular flora native to Italy, Plant Biosystems, 152, 2, pp. 179-303, (2018); Batjes, N…		Springer Science and Business Media Deutschland GmbH						1436378X; 14363798				English	Article	Final	All Open Access; Green Accepted Open Access; Green Open Access; Hybrid Gold Open Access	Scopus	2-s2.0-85177196710
Y., Trisurat, Yongyut; N., Sutummawong, Nantida; P.R., Roehrdanz, Patrick R.; A., Chitechote, Auschada	Trisurat, Yongyut (15752404300); Sutummawong, Nantida (36599233700); Roehrdanz, Patrick R. (54400316700); Chitechote, Auschada (57215769683)	15752404300; 36599233700; 54400316700; 57215769683	Climate Change Impacts on Species Composition and Floristic Regions in Thailand	2023	Diversity	15	10	1087			0	7	10.3390/d15101087	https://www.scopus.com/inward/record.uri?eid=2-s2.0-85175259346&doi=10.3390%2Fd15101087&partnerID=40&md5=48c962cef7eaaebb6a8657c6b9d3c6c3	Kasetsart University, Bangkok, Thailand; Conservation International, Arlington, United States; National Park, Wildlife and Plant Conservation Department, Thailand, Bangkok, Thailand	Trisurat, Yongyut, Faculty of Forestry, Kasetsart University, Bangkok, Thailand; Sutummawong, Nantida, Faculty of Forestry, Kasetsart University, Bangkok, Thailand; Roehrdanz, Patrick R., Conservation International, Arlington, United States; Chitechote, Auschada, National Park, Wildlife and Plant Conservation Department, Thailand, Bangkok, Thailand	Tropical forests are vulnerable to climate change including increased temperatures and changes to rainfall variation. Here, we use Thailand as a case study for assessing the impacts of the shared socio-economic pathway and climate scenarios on changes to the distribution and extent of floristic regions. To address this question, we assigned floristic regions based on a structured cluster analysis…	Climate Change; Forest Composition; Plant Species; Tropical Forests; Vulnerable; Algorithm; Climate Change; Climate Effect; Community Composition; Geographical Distribution; Tropical Forest; Vulnerability; Thailand	algorithm; climate change; climate effect; community composition; geographical distribution; tropical forest; vulnerability; Thailand			Murphy, Brett P., What controls the distribution of tropical forest and savanna?, Ecology Letters, 15, 7, pp. 748-758, (2012); Myers, Norman, Biodiversity hotspots for conservation priorities, Nature, 403, 6772, pp. 853-858, (2000); Mitchard, Edward T.A., The tropical forest carbon cycle and climate change, Nature, 559, 7715, pp. 527-534, (2018); Qie, Lan, Long-term carbon sink in Borneo's forest…		Multidisciplinary Digital Publishing Institute (MDPI)						14242818				English	Article	Final	All Open Access; Gold Open Access	Scopus	2-s2.0-85175259346
H., Boukerker, Hassen; H., Lynda, Hecini; S., Nora, Salemkour; B.M., Rachida, Boumedjane Mouna; K., Wahida, Kherifi; A., Doghbage, Abdelghafour; F.A., Belhouadjeb, Fathi Abdellatif; B., Fadia, Bekiri; B., Meriem, Boultif; D., Nacima, Diab	Boukerker, Hassen (57484825300); Lynda, Hecini (57423851300); Nora, Salemkour (57919007200); Rachida, Boumedjane Mouna (57918218200); Wahida, Kherifi (57918616100); Doghbage, Abdelghafour (57484871100); Belhouadjeb, Fathi Abdellatif (57208152045); Fadia, Bekiri (57919197900); Meriem, Boultif (57918218300); Nacima, Diab (57918025600)	57484825300; 57423851300; 57919007200; 57918218200; 57918616100; 57484871100; 57208152045; 57919197900; 57918218300; 57918025600	Impacts of grazing, restoration by planting on the pastoral potential, floristic richness and diversity of a the southwestern steppe of Naâma (Algeria), in the context of climate change	2022	Livestock Research for Rural Development	34	8				0	6		https://www.scopus.com/inward/record.uri?eid=2-s2.0-85139433993&partnerID=40&md5=54f8e42f95febc28eaf8cb6d041d7548	Centre de Recherche Scientifique et Technique sur les Régions Arides, Biskra, Algeria; Conservation of the Biskra forests, Algiers, Algeria; Centre de Recherche en Agropastoralisme (CRAPAST), Djelfa, Algeria	Boukerker, Hassen, Centre de Recherche Scientifique et Technique sur les Régions Arides, Biskra, Algeria; Lynda, Hecini, Centre de Recherche Scientifique et Technique sur les Régions Arides, Biskra, Algeria; Nora, Salemkour, Centre de Recherche Scientifique et Technique sur les Régions Arides, Biskra, Algeria; Rachida, Boumedjane Mouna, Conservation of the Biskra forests, Algiers, Algeria; Wahida…	This study is an analysis of the overgrazing effect, restoration by plantation on three steppe formations in the region of Naâma southwest of Algeria. It is a formation in Aristida pungens and Atriplex canescens, formation in Stipa tenacissima and another based on a plantation of Atriplex canescens; located respectively in the sites of, Swiga, Nofikha and Touifza. These steppes constitute a poor …	Anthropozoic; Chamaephytes; Climate Change; Formation; Grazing; Phyto-ecology; Steppe				Bulletin De La Societe Dhistoire Naturelle De Lafrique Du Nord, (1983); Contribution A La Connaissance Des Groupements A Sparte Lygeum Spartum L Des Hauts Plateaux Sud Oranais Etude Phyto Ecologique Et Syntaxonomique, (1984); Contribution A L Etude Des Ecosystemes Steppiques Patures Des Hautes Plaines Algero Oranaises Algerie Fonctionnement Evaluation Et Evolution Des Ressources Vegetales these D…		Fundacion CIPAV						1213784				English	Article	Final		Scopus	2-s2.0-85139433993
B.T., Trew, Brittany T.; R.I., Early, Regan I.; J.P., Duffy, James P.; S.L., Chown, Steven L.; I.M.D., Maclean, Ilya M.D.	Trew, Brittany T. (57212454478); Early, Regan I. (8921812300); Duffy, James P. (56309988000); Chown, Steven L. (7006383635); Maclean, Ilya M.D. (58311881400)	57212454478; 8921812300; 56309988000; 7006383635; 58311881400	Using near-ground leaf temperatures alters the projected climate change impacts on the historical range of a floristic biodiversity hotspot	2022	Diversity and Distributions	28	6		1282	1297	0	6	10.1111/ddi.13540	https://www.scopus.com/inward/record.uri?eid=2-s2.0-85128917029&doi=10.1111%2Fddi.13540&partnerID=40&md5=49b882c7ea6608a1b20a624281814b3c	University of Exeter, Exeter, United Kingdom; University of Exeter, Exeter, United Kingdom; Monash University, Melbourne, Australia	Trew, Brittany T., Environment and Sustainability Institute, University of Exeter, Exeter, United Kingdom; Early, Regan I., College of Life and Environmental Sciences, University of Exeter, Exeter, United Kingdom; Duffy, James P., Environment and Sustainability Institute, University of Exeter, Exeter, United Kingdom; Chown, Steven L., Monash University, Melbourne, Australia; Maclean, Ilya M.D., E…	Aim: Species distribution models (SDMs) have been used widely to predict the responses of species to climate change. However, the climate data used to drive these models typically represents ambient air temperatures, derived from measurements taken 1–2 m above the ground. Most plant species live near the ground where temperatures can differ significantly, owing to the effects of solar radiation a…	Biodiversity Hotspots; Climate Change; Conservation; Mediterranean-type Biome; Microclimate; Mountains; Refugia; Species Distribution Models; Biodiversity; Climate Change; Ecological Modeling; Mediterranean Environment; Microclimate; Refuge; Species Occurrence; Species Richness; South Africa	biodiversity; climate change; ecological modeling; Mediterranean environment; microclimate; refuge; species occurrence; species richness; South Africa			Aalto, Juha, Biogeophysical controls on soil-atmosphere thermal differences: Implications on warming Arctic ecosystems, Environmental Research Letters, 13, 7, (2018); Fynbos Ecology Evolution and Conservation of A Megadiverse Region, (2014); Fynbos Ecology Evolution and Conservation of A Megadiverse Region, (2014); Fynbos Ecology Evolution and Conservation of A Megadiverse Region, (2014); Araújo,…		John Wiley and Sons Inc						14724642; 13669516		DIDIF		English	Article	Final	All Open Access; Gold Open Access; Green Final Open Access; Green Open Access	Scopus	2-s2.0-85128917029
E.A., Alsherif, Emad A.; O.A.H., Almaghrabi, Omar Abdel Hakeim	Alsherif, Emad A. (55609317600); Almaghrabi, Omar Abdel Hakeim (13614344200)	55609317600; 13614344200	CONSEQUENCES OF CLIMATE CHANGE ON THE FLORISTIC COMPOSITION OF KHULAIS REGION, SAUDI ARABIA	2022	Applied Ecology and Environmental Research	20	3		2683	2695	0	5	10.15666/aeer/2003_26832695	https://www.scopus.com/inward/record.uri?eid=2-s2.0-85132129515&doi=10.15666%2Faeer%2F2003_26832695&partnerID=40&md5=9192a530a3d2a3a632c2df1c8715c4ea	University of Jeddah, Jeddah, Saudi Arabia; Faculty of Sciences, Beni Suef, Egypt; University of Jeddah, Jeddah, Saudi Arabia	Alsherif, Emad A., Department of Biology, University of Jeddah, Jeddah, Saudi Arabia, Department of Botany and Microbiology, Faculty of Sciences, Beni Suef, Egypt; Almaghrabi, Omar Abdel Hakeim, Department of Biology, University of Jeddah, Jeddah, Saudi Arabia	Climate change has resulted in profound changes in biodiversity throughout the globe. It has also become a serious source of worry for environmentalists and governments alike. The goal of this study is to provide first-hand information about the effects of climate change on floristic composition in the Khulais region, Saudi Arabia, during the last decade. Data obtained from the metrological stati…	Biodiversity; Drought Indices; Invasive; Prosopis; Trianthema				Alkolibi, Fahad M., Possible effects of global warming on agriculture and water resources in Saudi Arabia: Impacts and responses, Climatic Change, 54, 1-2, pp. 225-245, (2002); Alsherif, Emad A., Floristic composition, life form and chorology of plant life at khulais region, western Saudi Arabia, Pakistan Journal of Botany, 45, 1, pp. 29-38, (2013); Alsherif, Emad A., Heavy Metal Effects on Biodi…		Corvinus University of Budapest						17850037; 15891623				English	Article	Final	All Open Access; Gold Open Access	Scopus	2-s2.0-85132129515
T.M., Williams, Tanisha M.; C.D., Schlichting, Carl D.; K.E., Holsinger, Kent E.	Williams, Tanisha M. (56561380400); Schlichting, Carl D. (7003858545); Holsinger, Kent E. (7003843810)	56561380400; 7003858545; 7003843810	Herbarium records demonstrate changes in flowering phenology associated with climate change over the past century within the Cape Floristic Region, South Africa	2021	Climate Change Ecology	1		100006			0	13	10.1016/j.ecochg.2021.100006	https://www.scopus.com/inward/record.uri?eid=2-s2.0-85134765957&doi=10.1016%2Fj.ecochg.2021.100006&partnerID=40&md5=89661f42f403316980f7ea4505d08cb4	University of Connecticut, Storrs, United States	Williams, Tanisha M., Department of Ecology and Evolutionary Biology, University of Connecticut, Storrs, United States; Schlichting, Carl D., Department of Ecology and Evolutionary Biology, University of Connecticut, Storrs, United States; Holsinger, Kent E., Department of Ecology and Evolutionary Biology, University of Connecticut, Storrs, United States	Climate change is affecting species composition and diversity across the globe. Phenological changes provide a sensitive indicator of biological responses to changes in climate. Recent studies using herbarium records in Europe and North America have shown changes in flowering time and other phenological events in response to changing climate conditions, such as warming temperatures and chilling w…	Biodiversity Hotspot; Cape Floristic Region (cfr); Climate Change; Flowering Times; Herbarium Specimens; Mediterranean; Pelargonium; Phenology; South Africa; Temperature Response				Anderson, Bruce C., The geographical mosaic of coevolution in a plant-pollinator mutualism, Evolution, 62, 1, pp. 220-225, (2008); Anderson, Jill T., Phenotypic plasticity and adaptive evolution contribute to advancing flowering phenology in response to climate change, Proceedings of the Royal Society B: Biological Sciences, 279, 1743, pp. 3843-3852, (2012); Aono, Y., Phenological data series of …		Elsevier Inc.						26669005				English	Article	Final	All Open Access; Gold Open Access	Scopus	2-s2.0-85134765957
T.G., Bezerra, Talita Godinho; A.R., Roberto Ruschel, Ademir Roberto; F., Emmert, Fabiano; R.G.M., Nascimento, Rodrigo Geroni Mendes	Bezerra, Talita Godinho (57205236417); Roberto Ruschel, Ademir Roberto (36928208100); Emmert, Fabiano (36131261300); Nascimento, Rodrigo Geroni Mendes (35264499200)	57205236417; 36928208100; 36131261300; 35264499200	Changes caused by forest logging in structure and floristic diversity of natural regeneration: Relationship between climate variables and forest dynamics in the eastern Amazon	2021	Forest Ecology and Management	482		118862			0	17	10.1016/j.foreco.2020.118862	https://www.scopus.com/inward/record.uri?eid=2-s2.0-85098453957&doi=10.1016%2Fj.foreco.2020.118862&partnerID=40&md5=bb0e8485c7df7e6805af6d0f895ea8f9	Amazon Rural Federal University, Belem, Brazil; Embrapa Amazônia Oriental, Belem, Brazil; Amazon Rural Federal University (ICA/UFRA), Belem, Brazil	Bezerra, Talita Godinho, Graduate Program in Forest Sciences, Amazon Rural Federal University, Belem, Brazil; Roberto Ruschel, Ademir Roberto, Embrapa Amazônia Oriental, Belem, Brazil; Emmert, Fabiano, Graduate Program of Forest Science, Amazon Rural Federal University (ICA/UFRA), Belem, Brazil; Nascimento, Rodrigo Geroni Mendes, Graduate Program of Forest Science, Amazon Rural Federal University…	Several studies indicate that the Amazon rainforest is home to the greatest biodiversity of tree species on the planet. The unique quality of this forest typology is under constant threat of change owing to the behavior of climate variables and different anthropic activities that occur in the biome itself. Therefore, it is essential to conduct studies that clarify the factors that affect the form…	Forest Composition; Forest Management; Hill Series; Rainforest; Biodiversity; Climate Change; Dynamics; Annual Precipitation; Compensated Temperature; Diameter-at-breast Heights; Exponential Reduction; Floristic Diversity; Floristic Similarities; Forest Management Practices; Natural Regeneration; Reforestation; Biodiversity; Biome; Climate Variation; Forest Dynamics; Forest Management; Forestry P…	Biodiversity; Climate change; Dynamics; Annual precipitation; Compensated temperature; Diameter-at-breast heights; Exponential reduction; Floristic diversity; Floristic similarities; Forest management practices; Natural regeneration; Reforestation; biodiversity; biome; climate variation; forest dynamics; forest management; forestry practice; global climate; logging (timber); regeneration; species…			Alvares, Clayton Alcarde, Köppen's climate classification map for Brazil, Meteorologische Zeitschrift, 22, 6, pp. 711-728, (2013); de Andrade, Darlison Fernandes Carvalho, Post-fire recovery of a dense ombrophylous forest in amazon, Anais da Academia Brasileira de Ciencias, 91, 2, (2019); Chase, Mark W., An update of the Angiosperm Phylogeny Group classification for the orders and families of flo…		Elsevier B.V.						3781127		FECMD		English	Article	Final		Scopus	2-s2.0-85098453957
T., Tyler, Torbjörn; L., Herbertsson, Lina; P.A., Olsson, Pål Axel; L., Fröberg, Lars; K.A., Olsson, Kjell Arne; Å., Svensson, Åke; O., Olsson, Ola	Tyler, Torbjörn (7102242892); Herbertsson, Lina (56638527500); Olsson, Pål Axel (35509847500); Fröberg, Lars (6602543869); Olsson, Kjell Arne (7102746410); Svensson, Åke (57200288767); Olsson, Ola (7101889183)	7102242892; 56638527500; 35509847500; 6602543869; 7102746410; 57200288767; 7101889183	Climate warming and land-use changes drive broad-scale floristic changes in Southern Sweden	2018	Global Change Biology	24	6		2607	2621	0	29	10.1111/gcb.14031	https://www.scopus.com/inward/record.uri?eid=2-s2.0-85040641260&doi=10.1111%2Fgcb.14031&partnerID=40&md5=a5aad19e2d8a334315fac5091ccf0a4f	Lunds Universitet, Lund, Sweden; Lunds Universitet, Lund, Sweden; Lunds Universitet, Lund, Sweden; Lund Botanical Society, Kristianstad, Sweden	Tyler, Torbjörn, Department of Biology, Lunds Universitet, Lund, Sweden; Herbertsson, Lina, Centre for Environmental and Climate Research, Lunds Universitet, Lund, Sweden; Olsson, Pål Axel, Department of Biology, Lunds Universitet, Lund, Sweden; Fröberg, Lars, Lund Botanical Society, Kristianstad, Sweden; Olsson, Kjell Arne, Lund Botanical Society, Kristianstad, Sweden; Svensson, Åke, Lund Botani…	Land-use changes, pollution and climate warming during the 20th century have caused changes in biodiversity across the world. However, in many cases, the environmental drivers are poorly understood. To identify and rank the drivers currently causing broad-scale floristic changes in N Europe, we analysed data from two vascular plant surveys of 200 randomly selected 2.5 × 2.5 km grid-squares in Sca…	Bee Decline; Citizen Science; Grazing; Humification; Mycorrhiza; Nitrogen Deposition; Phenology; Plant Traits; Action Research; Bee; Climate Change; Floristics; Global Warming; Grazing; Humification; Land Use Change; Mycorrhiza; Nitrogen; Phenology; Vascular Plant; Skane; Sweden; Apoidea; Lepidoptera; Tracheophyta; Agriculture; Biodiversity; Ecosystem; Embryophyta; Growth, Development And Aging; …	action research; bee; climate change; floristics; global warming; grazing; humification; land use change; mycorrhiza; nitrogen; phenology; vascular plant; Skane; Sweden; Apoidea; Lepidoptera; Tracheophyta; agriculture; biodiversity; ecosystem; Embryophyta; growth, development and aging; physiology; plant dispersal; Agriculture; Biodiversity; Climate Change; Ecosystem; Plant Dispersal			Symb Bot Ups, (1996); Arts, Gertie H.P., Deterioration of atlantic soft water macrophyte communities by acidification, eutrophication and alkalinisation, Aquatic Botany, 73, 4, pp. 373-393, (2002); Bahr, Adam, Long-term changes in vegetation and soil chemistry in a calcareous and sandy semi-natural grassland, Flora: Morphology, Distribution, Functional Ecology of Plants, 207, 5, pp. 379-387, (201…		Blackwell Publishing Ltd						13541013; 13652486			29282822	English	Article	Final		Scopus	2-s2.0-85040641260
D., Jewitt, Debbie; P.S., Goodman, Peter Styan; B.F., Erasmus, Barend F.N.; T.G., O’Connor, Timothy G.; E.T.F., Witkowski, Ed Tadeusz Fernando	Jewitt, Debbie (56459771100); Goodman, Peter Styan (7102669641); Erasmus, Barend F.N. (7004822392); O’Connor, Timothy G. (57190857979); Witkowski, Ed Tadeusz Fernando (7005010313)	56459771100; 7102669641; 7004822392; 57190857979; 7005010313	Planning for the Maintenance of Floristic Diversity in the Face of Land Cover and Climate Change	2017	Environmental Management	59	5		792	806	0	18	10.1007/s00267-017-0829-0	https://www.scopus.com/inward/record.uri?eid=2-s2.0-85011672613&doi=10.1007%2Fs00267-017-0829-0&partnerID=40&md5=ed0e6abecbf36efa9a4791e8542c43a8	Ezemvelo KZN Wildlife, Cascade, South Africa; University of the Witwatersrand, Johannesburg, Johannesburg, South Africa; University of the Witwatersrand, Johannesburg, Johannesburg, South Africa; South African Environmental Observation Network, Grahamstown, South Africa	Jewitt, Debbie, Biodiversity Research and Assessment, Ezemvelo KZN Wildlife, Cascade, South Africa, School of Animal, University of the Witwatersrand, Johannesburg, Johannesburg, South Africa; Goodman, Peter Styan, School of Animal, University of the Witwatersrand, Johannesburg, Johannesburg, South Africa; Erasmus, Barend F.N., Global Change and Sustainability Research Institute, University of th…	Habitat loss and climate change are primary drivers of global biodiversity loss. Species will need to track changing environmental conditions through fragmented and transformed landscapes such as KwaZulu-Natal, South Africa. Landscape connectivity is an important tool for maintaining resilience to global change. We develop a coarse-grained connectivity map between protected areas to aid decision-…	Beta Diversity; Climate Refugia; Corridors; Ecological Processes; Gradients; Protected Areas; Biodiversity; Conservation; Decision Making; Ecosystems; Environmental Protection; Plants (botany); Beta Diversities; Climate Refugia; Corridors; Ecological Process; Gradients; Protected Areas; Climate Change; Biodiversity; Climate Change; Decision Making; Environmental Gradient; Floristics; Habitat Corr…	Biodiversity; Conservation; Decision making; Ecosystems; Environmental protection; Plants (botany); Beta diversities; Climate refugia; Corridors; Ecological process; Gradients; Protected areas; Climate change; biodiversity; climate change; decision making; environmental gradient; floristics; habitat corridor; habitat loss; land cover; protected area; refugium; global change; habitat; land use; la…			Ackerly, David D., The geography of climate change: Implications for conservation biogeography, Diversity and Distributions, 16, 3, pp. 476-487, (2010); Anderson, Mark G., Conserving the stage: Climate change and the geophysical underpinnings of species diversity, PLOS ONE, 5, 7, (2010); Anderson, Mark G., Estimating climate resilience for conservation across geophysical settings, Conservation Bi…		Springer New York LLC barbara.b.bertram@gsk.com						14321009; 0364152X		EMNGD	28160031	English	Article	Final		Scopus	2-s2.0-85011672613
A.I., Stoica, Adrian Ilie; N., Hodor, Nicolae; T., Tudose, Traian; G., Coldea, Gheorghe	Stoica, Adrian Ilie (58182943000); Hodor, Nicolae (58453481200); Tudose, Traian (57201987153); Coldea, Gheorghe (6506226959)	58182943000; 58453481200; 57201987153; 6506226959	Expected floristic changes in hygro-cryophilic and snowbed plant communities caused by climate change and human impact in the romanian carpathians; Modificări anticipate în structura floristică a comunităţilor vegetale higromicroterme şi de zăcători de zăpadă din carpaţii româniei, cauzate de schimbările climatice şi de impactul antropic	2017	Contributii Botanice	52			163	181	0	4	10.24193/Contrib.Bot.52.12	https://www.scopus.com/inward/record.uri?eid=2-s2.0-85046695122&doi=10.24193%2FContrib.Bot.52.12&partnerID=40&md5=5bfede17b5566c7dbe6ed6a8e6a96faf	Institute of Biological Research Cluj-Napoca, Cluj Napoca, Romania; Universitatea Babeș-Bolyai, Cluj Napoca, Romania	Stoica, Adrian Ilie, Department of Taxonomy and Ecology, Institute of Biological Research Cluj-Napoca, Cluj Napoca, Romania; Hodor, Nicolae, Department of Physical and Technical Geography, Universitatea Babeș-Bolyai, Cluj Napoca, Romania; Tudose, Traian, Department of Physical and Technical Geography, Universitatea Babeș-Bolyai, Cluj Napoca, Romania; Coldea, Gheorghe, Department of Taxonomy and E…	In the Romanian Carpathians, there are only 6 massifs where glacial forms (valleys and cirques) occupy sufficiently large areas to support typical high altitude wetlands and snowbed vegetation. We have analyzed 424 relevées with this type of vegetation published in Romanian literature in the past century from these massifs. The cryophilic vegetation was grouped in 17 plant associations, 4 allianc…	Alpine And Boreal Habitats; Endemic Species; Extinction Risk; Glacial Landforms; High Altitude Wetlands; Plant Diversity; Snow Depth; Temperature Projections				Vegetaia Masivului Lezer Papusa, (1998); Variabilitatea Si Schimbarea Climei in Romania, (2010); Betteridge, Keith, Effect of cattle and sheep treading on surface configuration of a sedimentary hill soil, Australian Journal of Soil Research, 37, 4, pp. 743-760, (1999); Flora Si Vegetatia Muntilor Tarcu, (1971); Pflanzensoziologie Grundzuge Der Vegetationskunde, (1964); Pajistile Din Masivul Paran…		Babes-Bolyai University, "Alexandru Borza" Botanic Garden grbot@grbot.ubbcluj.ro						00699616; 20673094				English	Article	Final	All Open Access; Bronze Open Access	Scopus	2-s2.0-85046695122
A., Reif, Albert; F., Xystrakis, Fotios; S.M., Gärtner, Stefanie M.; U., Sayer, Uwe	Reif, Albert (7006215345); Xystrakis, Fotios (26532095200); Gärtner, Stefanie M. (24474822100); Sayer, Uwe (6506000863)	7006215345; 26532095200; 24474822100; 6506000863	Floristic change at the drought limit of European beech (Fagus sylvatica L.) to downy oak (Quercus pubescens) forest in the temperate climate of central Europe	2017	Notulae Botanicae Horti Agrobotanici Cluj-Napoca	45	2		646	654	0	15	10.15835/nbha45210971	https://www.scopus.com/inward/record.uri?eid=2-s2.0-85029415863&doi=10.15835%2Fnbha45210971&partnerID=40&md5=5eabbcb3d6d6a569303afceaf6f081b0	Universität Freiburg, Freiburg im Breisgau, Germany; University of Patras, Rio, Greece; Black Forest National Park, Freudenstadt, Germany; FSC Germany, Freiburg im Breisgau, Germany	Reif, Albert, Chair of Site Classification and Vegetation Science, Universität Freiburg, Freiburg im Breisgau, Germany; Xystrakis, Fotios, Department of Environmental and Natural Resources Management, University of Patras, Rio, Greece; Gärtner, Stefanie M., Black Forest National Park, Freudenstadt, Germany; Sayer, Uwe, FSC Germany, Freiburg im Breisgau, Germany	An increase in drought could cause shifts in species composition and vegetation structure. In forests it limits the occurrence of drought sensitive tree species which become replaced by drought tolerant tree species and forest communities. Under temperate macroclimatic conditions, European beech (Fagus sylvatica L.) naturally dominates the forested landscape, except on extremely shallow soil in c…	Downy Oak; Quercus Petraea; Quercus Pubescens; Water Supply				Libri Botanici, (1998); Crop Evapotranspiration Guidelines for Computing Crop Water Requirements, (1998); Forstliche Standortsaufnahme, (1996); Austin, Mike P., Improving species distribution models for climate change studies: Variable selection and scale, Journal of Biogeography, 38, 1, pp. 1-8, (2011); Bolte, Andreas, The north-eastern distribution range of European beech - A review, Forestry, …		Academic Press 3-5 Manastur Street Cluj-Napoca 400372						0255965X; 18424309				English	Article	Final	All Open Access; Gold Open Access	Scopus	2-s2.0-85029415863
D., Jewitt, Debbie; B.F., Erasmus, Barend F.N.; P.S., Goodman, Peter Styan; T.G., O'Connor, Timothy Gordon; W.W., Hargrove, William W.; D.M., Maddalena, Damian M.; E.T.F., Witkowski, Ed Tadeusz Fernando	Jewitt, Debbie (56459771100); Erasmus, Barend F.N. (7004822392); Goodman, Peter Styan (7102669641); O'Connor, Timothy Gordon (7402142346); Hargrove, William W. (55938990000); Maddalena, Damian M. (56522950600); Witkowski, Ed Tadeusz Fernando (7005010313)	56459771100; 7004822392; 7102669641; 7402142346; 55938990000; 56522950600; 7005010313	Climate-induced change of environmentally defined floristic domains: A conservation based vulnerability framework	2015	Applied Geography	63			33	42	0	19	10.1016/j.apgeog.2015.06.004	https://www.scopus.com/inward/record.uri?eid=2-s2.0-84935017855&doi=10.1016%2Fj.apgeog.2015.06.004&partnerID=40&md5=5f482e4b9723ce52578021d20ecdc6da	Ezemvelo KZN Wildlife, Cascade, South Africa; University of the Witwatersrand, Johannesburg, Johannesburg, South Africa; SAEON, Roggebaai, South Africa; USDA Forest Service, Washington, D.C., United States; University of North Carolina Wilmington, Wilmington, United States	Jewitt, Debbie, Biodiversity Division, Ezemvelo KZN Wildlife, Cascade, South Africa, School of Animal, Plant and Environmental Sciences, University of the Witwatersrand, Johannesburg, Johannesburg, South Africa; Erasmus, Barend F.N., School of Animal, Plant and Environmental Sciences, University of the Witwatersrand, Johannesburg, Johannesburg, South Africa; Goodman, Peter Styan, Biodiversity Div…	Global climate change is having marked influences on species distributions, phenology and ecosystem composition and raises questions as to the effectiveness of current conservation strategies. Conservation planning has only recently begun to adequately account for dynamic threats such as climate change. We propose a method to incorporate climate-dynamic environmental domains, identified using spe…	Climatic Stability; Conservation Planning; Gradient Analysis; Habitat Intactness; Refugia; Biodiversity; Climate Change; Climate Modeling; Conservation Planning; Floristics; Habitat Conservation; Refugium; Vulnerability; Kwazulu-natal; South Africa	biodiversity; climate change; climate modeling; conservation planning; floristics; habitat conservation; refugium; vulnerability; KwaZulu-Natal; South Africa			Arcmap Version 10 2, (2013); Ashcroft, Michael B., Identifying refugia from climate change, Journal of Biogeography, 37, 8, pp. 1407-1413, (2010); Beier, Paul, Use of land facets to plan for climate change: Conserving the arenas, not the actors, Conservation Biology, 24, 3, pp. 701-710, (2010); Beier, Paul, A review of selection-based tests of abiotic surrogates for species representation, Conser…		Elsevier Ltd						1436228				English	Article	Final		Scopus	2-s2.0-84935017855
C.H.T., Chou, Changhung Hung Tony; T.J., Huang, Tsurng Juhn; Y.P., Lee, Yen Ping; C., Chen, Chiyuan; T., Hsu, Tsaiwen; C., Chen, Chihhui	Chou, Changhung Hung Tony (55481427800); Huang, Tsurng Juhn (23027423000); Lee, Yen Ping (54791092000); Chen, Chiyuan (54790630100); Hsu, Tsaiwen (7401791986); Chen, Chihhui (54384772900)	55481427800; 23027423000; 54791092000; 54790630100; 7401791986; 54384772900	Diversity of the alpine vegetation in central Taiwan is affected by climate change based on a century of floristic inventories	2011	Botanical Studies	52	4		503	516	0	9		https://www.scopus.com/inward/record.uri?eid=2-s2.0-84255171782&partnerID=40&md5=da17743d1af2ae0692bd4bab7f96b044	China Medical University, Taichung, Taiwan; Council of Agriculture, Taipei, Taiwan; National Pingtung University of Science and Technology, Pingtung, Taiwan; Endemic Species Research Institute, Nan-Tou, Taiwan	Chou, Changhung Hung Tony, Research Center for Biodiversity, China Medical University, Taichung, Taiwan; Huang, Tsurng Juhn, Research Center for Biodiversity, China Medical University, Taichung, Taiwan; Lee, Yen Ping, Hualien Forest District Office, Council of Agriculture, Taipei, Taiwan; Chen, Chiyuan, Graduate Institute of Bioresources, National Pingtung University of Science and Technology, Pi…	Floristically, Taiwan is a very rich island due to her varied geography, topography and habitats. Through extended historical research involving past and present botanical inventories of the central mountains, particularly of the Hehuanshan area of Taiwan, we are now able to examine the floristic composition of four elevation zones, 2,000-2,500 m, 2,500-3,000 m, 3,000-3,500 m, and 3,500-3,950 m. …	Αβγdiversity; Alishan; Alpine Vegetation; Global Warming; Hehuanshan; Plant Migration; Simpson's Diversity Index; Yushan				Terrestrial Plant Chou Et Al Diversity of Alpine Vegetation Affected by Climate Change513 Ecology, (1987); Beerling, David J., Climate change and the British scene, Journal of Ecology, 82, 2, pp. 391-397, (1994); Vegetation of Taiwan, (1995); Project Report of the National Science Council, (2009); United Nations Environment Programme, (2025); Statistical Procedures for Agricultural Research with …								1817406X; 19993110				English	Article	Final		Scopus	2-s2.0-84255171782
M.T., Hoffman, M. Timm; M.D., Cramer, Michael Denis; L., Gillson, Lindsey; M., Wallace, Michael	Hoffman, M. Timm (7403154726); Cramer, Michael Denis (7102304265); Gillson, Lindsey (6602665508); Wallace, Michael (36946454700)	7403154726; 7102304265; 6602665508; 36946454700	Pan evaporation and wind run decline in the Cape Floristic Region of South Africa (1974-2005): Implications for vegetation responses to climate change	2011	Climatic Change	109	2025-04-03		437	452	0	65	10.1007/s10584-011-0030-z	https://www.scopus.com/inward/record.uri?eid=2-s2.0-81755163932&doi=10.1007%2Fs10584-011-0030-z&partnerID=40&md5=22e0228f40a5ea92975fcf4fd61d80f1	University of Cape Town, Cape Town, South Africa; Western Cape Government, Cape Town, South Africa	Hoffman, M. Timm, Department of Botany, University of Cape Town, Cape Town, South Africa; Cramer, Michael Denis, Department of Botany, University of Cape Town, Cape Town, South Africa; Gillson, Lindsey, Department of Botany, University of Cape Town, Cape Town, South Africa; Wallace, Michael, Department of Agriculture, Western Cape Government, Cape Town, South Africa	In many regions of the world, increasing temperatures in recent decades are paradoxically associated with declining pan evaporation, but evidence is sparse for this trend from the southern hemisphere in general and sub-Saharan Africa in particular. In this study, we examined changes in pan evaporation and four other meteorological variables (rainfall, wind run, temperature and vapour pressure def…	Rain; Transpiration; Vegetation; Evaporative Demands; Increased Temperature; Increasing Temperatures; Maximum Temperature; Meteorological Variables; Southern Hemisphere; Vapour Pressure Deficits; Vegetation Response; Climate Change; Cape Floristic Region; Climate Change; Environmental Impact; Evaporation; Infiltration; Meteorology; Rainfall; Runoff; Temperature Effect; Twentieth Century; Vapor Pr…	Rain; Transpiration; Vegetation; Evaporative demands; Increased temperature; Increasing temperatures; Maximum temperature; Meteorological variables; Southern Hemisphere; Vapour pressure deficits; Vegetation response; Climate change; Cape Floristic Region; climate change; environmental impact; evaporation; infiltration; meteorology; rainfall; runoff; temperature effect; twentieth century; vapor pr…			Bertzky, Bastian, Potential impacts of future land use and climate change on the Red List status of the Proteaceae in the Cape Floristic Region, South Africa, Global Change Biology, 11, 9, pp. 1452-1468, (2005); Brutsaert, Wilfried H., Indications of increasing land surface evaporation during the second half of the 20th century, Geophysical Research Letters, 33, 20, (2006); Burn, Donald H., Trend…		Kluwer Academic Publishers rbk@louisiana.edu						15731480; 01650009	9780444533012	CLCHD		English	Article	Final		Scopus	2-s2.0-81755163932
C.J., Yates, Colin J.; J., Elith, Jane; A.M., Latimer, Andrew M.; D.C., Le Maitre, David C.; G.F., Midgley, Guy F.; F.M., Schurr, Frank M.; A.G., West, Adam G.	Yates, Colin J. (35567453600); Elith, Jane (8046847200); Latimer, Andrew M. (6603735596); Le Maitre, David C. (6701679632); Midgley, Guy F. (7006003164); Schurr, Frank M. (6505887167); West, Adam G. (7202674384)	35567453600; 8046847200; 6603735596; 6701679632; 7006003164; 6505887167; 7202674384	Projecting climate change impacts on species distributions in megadiverse South African Cape and Southwest Australian Floristic Regions: Opportunities and challenges	2010	Austral Ecology	35	4		374	391	0	91	10.1111/j.1442-9993.2009.02044.x	https://www.scopus.com/inward/record.uri?eid=2-s2.0-77954198267&doi=10.1111%2Fj.1442-9993.2009.02044.x&partnerID=40&md5=f0f44757834d06230c06a998553fea4f	Bentley Delivery Centre, Albany, Australia; University of Melbourne, Melbourne, Australia; University of California, Davis, Davis, United States; The Council for Scientific and Industrial Research, Pretoria, South Africa; South African Biodiversity Institute, Claremont, South Africa; Universität Potsdam, Potsdam, Germany; University of Cape Town, Cape Town, South Africa	Yates, Colin J., Western Australian Department of Environment and Conservation, Bentley Delivery Centre, Albany, Australia; Elith, Jane, School of Botany, University of Melbourne, Melbourne, Australia; Latimer, Andrew M., Department of Plant Sciences, University of California, Davis, Davis, United States; Le Maitre, David C., The Council for Scientific and Industrial Research, Pretoria, South Afr…	Increasing evidence shows that anthropogenic climate change is affecting biodiversity. Reducing or stabilizing greenhouse gas emissions may slow global warming, but past emissions will continue to contribute to further unavoidable warming for more than a century. With obvious signs of difficulties in achieving effective mitigation worldwide in the short term at least, sound scientific predictions…	Biodiversity Hotspot; Climate Change Risk Assessment; Mediterranean Type Ecosystem; Species Distribution Modelling; Anthropogenic Effect; Australian Kingdom; Biodiversity; Cape Floristic Region; Climate Change; Climate Effect; Conservation Planning; Emission Control; Environmental Protection; Greenhouse Gas; Population Distribution; Prediction; Risk Assessment	anthropogenic effect; Australian Kingdom; biodiversity; Cape Floristic Region; climate change; climate effect; conservation planning; emission control; environmental protection; greenhouse gas; population distribution; prediction; risk assessment			Fire in Ecosystems of South West Western Australia Impacts and Management, (2003); Abbott, Ian J., Monitoring the impact of climate change on biodiversity: The challenge of megadiverse Mediterranean climate ecosystems, Austral Ecology, 35, 4, pp. 406-422, (2010); Ainsworth, Elizabeth Anna, What have we learned from 15 years of free-air CO2 enrichment (FACE)? A meta-analytic review of the response…								14429985		AUECF		English	Review	Final		Scopus	2-s2.0-77954198267
C.J., Yates, Colin J.; A., McNeill, Asha; J., Elith, Jane; G.F., Midgley, Guy F.	Yates, Colin J. (35567453600); McNeill, Asha (35757762200); Elith, Jane (8046847200); Midgley, Guy F. (7006003164)	35567453600; 35757762200; 8046847200; 7006003164	Assessing the impacts of climate change and land transformation on Banksia in the South West Australian Floristic Region	2010	Diversity and Distributions	16	1		187	201	0	110	10.1111/j.1472-4642.2009.00623.x	https://www.scopus.com/inward/record.uri?eid=2-s2.0-74549172109&doi=10.1111%2Fj.1472-4642.2009.00623.x&partnerID=40&md5=bca193492f4a18885affd2c48a0f3765	Bentley Delivery Centre, Albany, Australia; University of Melbourne, Melbourne, Australia; South African National Biodiversity Institute, Pretoria, South Africa	Yates, Colin J., Western Australian Department of Environment and Conservation, Bentley Delivery Centre, Albany, Australia; McNeill, Asha, Western Australian Department of Environment and Conservation, Bentley Delivery Centre, Albany, Australia; Elith, Jane, School of Botany, University of Melbourne, Melbourne, Australia; Midgley, Guy F., South African National Biodiversity Institute, Pretoria, S…	Aim To determine the potential combined effects of climate change and land transformation on the modelled geographic ranges of Banksia. Location Mediterranean climate South West Australian Floristic Region (SWAFR). Methods We used the species distribution modelling software Maxent to relate current environmental conditions to occurrence data for 18 Banksia species, and subsequently made spatial p…	Biodiversity Hotspot; Climate Change; Habitat Fragmentation; Maxent; Mediterranean-type Ecosystem; Species Distribution Model; Biodiversity; Climate Change; Climate Effect; Dispersal; Evergreen Tree; Floristics; Habitat Fragmentation; Landscape Change; Physiology; Phytogeography; Population Distribution; Range Size; Software; Australia; Banksia; Proteaceae	biodiversity; climate change; climate effect; dispersal; evergreen tree; floristics; habitat fragmentation; landscape change; physiology; phytogeography; population distribution; range size; software; Australia; Banksia; Proteaceae			Ainsworth, Elizabeth Anna, What have we learned from 15 years of free-air CO2 enrichment (FACE)? A meta-analytic review of the responses of photosynthesis, canopy properties and plant production to rising CO2, New Phytologist, 165, 2, pp. 351-372, (2005); Anderson, Kevin L., Reframing the climate change challenge in light of post-2000 emission trends, Philosophical transactions. Series A, Mathema…								14724642; 13669516		DIDIF		English	Article	Final		Scopus	2-s2.0-74549172109
B.L., Swart, Belinda Louisa; K.A., Tolley, Krystal A.; C.A., Matthee, Conrad A.	Swart, Belinda Louisa (25923623500); Tolley, Krystal A. (7004493783); Matthee, Conrad A. (56593725500)	25923623500; 7004493783; 56593725500	Climate change drives speciation in the southern rock agama (Agama atra) in the Cape Floristic Region, South Africa	2009	Journal of Biogeography	36	1		78	87	0	60	10.1111/j.1365-2699.2008.01988.x	https://www.scopus.com/inward/record.uri?eid=2-s2.0-57549104873&doi=10.1111%2Fj.1365-2699.2008.01988.x&partnerID=40&md5=6a1709380227087e1e591af8664d1879	Stellenbosch University, Stellenbosch, South Africa; South African National Biodiversity Institute, Pretoria, South Africa; Stellenbosch University, Stellenbosch, South Africa	Swart, Belinda Louisa, Department of Botany and Zoology, Stellenbosch University, Stellenbosch, South Africa; Tolley, Krystal A., Molecular Ecology and Evolution Program, South African National Biodiversity Institute, Pretoria, South Africa; Matthee, Conrad A., Department of Botany and Zoology, Stellenbosch University, Stellenbosch, South Africa, Department of Botany and Zoology, Stellenbosch Uni…	Aim: Vicariance has played a major role in the evolution of the southern rock agama, Agama atra (Reptilia: Agamidae), and it is hypothesized that habitat shifts will affect small-scale patterns of gene flow. The Cape Floristic Region (CFR) is known for high levels of diversity and endemism; thus we set out to investigate whether genetic structuring of CFR populations of A. atra corresponds to reg…	Agamidae; Cape Fold Mountains; Coalescence; Control Region; Landscape Genetics; Lizard; Mtdna; Nd2; Phylogeography; Southern Africa; Cape Floristic Region; Climate Change; Endemism; Evolution; Gene Flow; Genetic Structure; Lizard; Mitochondrial Dna; Phylogeography; Speciation (biology); Species Diversity; Africa; Cape Fold Belt; South Africa; Southern Africa; Sub-saharan Africa; Agama; Agama Agam…	Cape Floristic Region; climate change; endemism; evolution; gene flow; genetic structure; lizard; mitochondrial DNA; phylogeography; speciation (biology); species diversity; Africa; Cape Fold Belt; South Africa; Southern Africa; Sub-Saharan Africa; Agama; Agama agama; Agama atra; Agamidae; Animalia; Reptilia; Squamata			Anderson, Stephen, Sequence and organization of the human mitochondrial genome, Nature, 290, 5806, pp. 457-465, (1981); A Review of the Amphibians and Reptiles of the Cape Floristic Region as Indicators of Centres of Biodiversity Sensitive Habitats and Sites of Special Interest, (1999); Bandelt, Hans Jürgen, Median-joining networks for inferring intraspecific phylogenies, Molecular Biology and Ev…								13652699; 03050270		JBIOD		English	Article	Final		Scopus	2-s2.0-57549104873
O.A., Anenkhonov, O. A.; L.V., Krivobokov, Leonid V.	Anenkhonov, O. A. (6506835440); Krivobokov, Leonid V. (35801026000)	6506835440; 35801026000	Trends of changes in the floristic composition of forest vegetation in the northern Baikal region upon climate warming	2006	Russian Journal of Ecology	37	4		251	256	0	5	10.1134/S1067413606040060	https://www.scopus.com/inward/record.uri?eid=2-s2.0-33745894172&doi=10.1134%2FS1067413606040060&partnerID=40&md5=e228d22e89b50af3cc0c36f2043f2c0b	Institute of General and Experimental Biology of the Siberian Branch of the RAS, Ulan-Ude, Russian Federation	Anenkhonov, O. A., Siberian Division, Institute of General and Experimental Biology of the Siberian Branch of the RAS, Ulan-Ude, Russian Federation; Krivobokov, Leonid V., Siberian Division, Institute of General and Experimental Biology of the Siberian Branch of the RAS, Ulan-Ude, Russian Federation	Parameters characterizing the activity of species in altitudinal zonal elements of the flora have been analyzed in the northern Baikal region. The results provide evidence for the weakening status of xerophilic species in the cenoflora of hemiboreal light coniferous forests of the class Rhytidio-Laricetea, which form the lower part of the forest belt bordering the steppe. This fact indicates that…	Baikal Region; Climate Warming; Flora; Forests; Altitudinal Zonation; Climate Change; Coniferous Forest; Flora; Humidity; Permafrost; Precipitation (climatology); Baikal Mountains; Eurasia; Russian Federation; Vaccinio	altitudinal zonation; climate change; coniferous forest; flora; humidity; permafrost; precipitation (climatology); Baikal Mountains; Eurasia; Russian Federation; Vaccinio			Extended Abstract of Doctoral Geogr Dissertation, (1998); Atlas of Transbaikalia, (1967); Stepi Severnoi Evrazii Etalonnye Stepnye Landshafty Problemy Okhrany Ekologicheskoi Restavratsii I Ispol Zovaniya Steppes of Northern Eurasia Reference Steppe Landscapes Problems of Conservation Ecological Rehabilitation and Use, (2003); Samoorganizatsiya I Dinamika Geomorfosistem Matly Xxvii Plenuma Geomorf…								10674136; 16083334		RJOEE		English	Article	Final		Scopus	2-s2.0-33745894172
C.R., Pyke, Christopher R.; S.J., Andelman, Sandy J.; G.F., Midgley, Guy F.	Pyke, Christopher R. (7006152105); Andelman, Sandy J. (7004010557); Midgley, Guy F. (7006003164)	7006152105; 7004010557; 7006003164	Identifying priority areas for bioclimatic representation under climate change: A case study for Proteaceae in the Cape Floristic Region, South Africa	2005	Biological Conservation	125	1		1	9	0	41	10.1016/j.biocon.2004.08.004	https://www.scopus.com/inward/record.uri?eid=2-s2.0-19444376850&doi=10.1016%2Fj.biocon.2004.08.004&partnerID=40&md5=4008c9813bcfd38efe6862a2fb732a26	National Center for Ecological Analysis and Synthesis, Santa Barbara, United States; South African National Biodiversity Institute, Pretoria, South Africa	Pyke, Christopher R., National Center for Ecological Analysis and Synthesis, Santa Barbara, United States; Andelman, Sandy J., National Center for Ecological Analysis and Synthesis, Santa Barbara, United States; Midgley, Guy F., National Botanical Institute, South African National Biodiversity Institute, Pretoria, South Africa	Biological reserves are established to protect natural resources and represent the diversity of environments found within a region. Unfortunately, many systems of protected areas do not proportionally capture the range of environmental conditions occupied by species and communities. Combinations of habitat loss and climate change may exacerbate these representational biases, and result in future …	Bioclimatic Representation; Biodiversity; Climate Change; Reserve Design And Selection; Systematic Conservation Planning; Climate Change; Conservation Planning; Conservation Status; Habitat Loss; Prioritization; Protected Area; Africa; Eastern Hemisphere; South Africa; Southern Africa; Sub-saharan Africa; World; Proteaceae	climate change; conservation planning; conservation status; habitat loss; prioritization; protected area; Africa; Eastern Hemisphere; South Africa; Southern Africa; Sub-Saharan Africa; World; Proteaceae			Andelman, Sandy J., Present patterns and future prospects for biodiversity in the Western Hemisphere, Ecology Letters, 6, 9, pp. 818-824, (2003); Camm, Jeffrey D., Nature reserve site selection to maximize expected species covered, Operations Research, 50, 6, pp. 946-1076, (2002); Cowling, Richard Mark, Plant diversity in mediterranean-climate regions, Trends in Ecology and Evolution, 11, 9, pp. …								63207	0521397863; 9780521397865	BICOB		English	Article	Final		Scopus	2-s2.0-19444376850
B., Bertzky, Bastian; D.M., Richardson, David M.; J.S., Donaldson, John Sydney; G.O., Hughes, Greg O.; G.F., Midgley, Guy F.; D.C., Raimondo, Domitilla C.; A.G., Rebelo, Anthony G.; M., Rouget, Mathieu; W., Thuiller, Wilfried	Bertzky, Bastian (8274413300); Richardson, David M. (7403444596); Donaldson, John Sydney (7202496372); Hughes, Greg O. (9333823300); Midgley, Guy F. (7006003164); Raimondo, Domitilla C. (7004022340); Rebelo, Anthony G. (7004035788); Rouget, Mathieu (6701328477); Thuiller, Wilfried (6602123683)	8274413300; 7403444596; 7202496372; 9333823300; 7006003164; 7004022340; 7004035788; 6701328477; 6602123683	Potential impacts of future land use and climate change on the Red List status of the Proteaceae in the Cape Floristic Region, South Africa	2005	Global Change Biology	11	9		1452	1468	0	114	10.1111/j.1365-2486.2005.00997.x	https://www.scopus.com/inward/record.uri?eid=2-s2.0-15244345565&doi=10.1111%2Fj.1365-2486.2005.00997.x&partnerID=40&md5=b75a6df7f84e7f96079fa9c53bbc451b	South African National Biodiversity Institute, Pretoria, South Africa; University of Cape Town, Cape Town, South Africa; Stellenbosch University, Stellenbosch, South Africa; University of Cape Town, Cape Town, South Africa; Center for Applied Biodiversity Science, Washington, United States	Bertzky, Bastian, Kirstenbosch Research Centre, South African National Biodiversity Institute, Pretoria, South Africa, Percy FitzPatrick Institute of African Ornithology, University of Cape Town, Cape Town, South Africa, ; Richardson, David M., Centre for Invasion Biology, Stellenbosch University, Stellenbosch, South Africa, Institute for Plant Conservation, University of Cape Town, Cape Town, So…	Using spatial predictions of future threats to biodiversity, we assessed for the first time the relative potential impacts of future land use and climate change on the threat status of plant species. We thus estimated how many taxa could be affected by future threats that are usually not included in current IUCN Red List assessments. Here, we computed the Red List status including future threats …	Biodiversity Conservation; Cape Floristic Region; Climate Change; Extinction Risk; Iucn Red List; Land Use Change; Niche-based Models; Proteaceae; Threatened Species; Biodiversity; Cape Floristic Region; Climate Change; Extinction Risk; Land Use Change; Red List; Africa; South Africa; Southern Africa; Sub-saharan Africa; Proteaceae	biodiversity; Cape Floristic Region; climate change; extinction risk; land use change; Red List; Africa; South Africa; Southern Africa; Sub-Saharan Africa; Proteaceae			Akçakaya, H. Reşit, Making consistent IUCN classifications under uncertainty, Conservation Biology, 14, 4, pp. 1001-1013, (2000); Araújo, Miguel B., Would climate change drive species out of reserves? An assessment of existing reserve-selection methods, Global Change Biology, 10, 9, pp. 1618-1626, (2004); Brooks, Matthew L., Effects of invasive alien plants on fire regimes, BioScience, 54, 7, pp.…								13541013; 13652486				English	Article	Final		Scopus	2-s2.0-15244345565
G.F., Midgley, Guy F.; L., Hannah, Lee; D., Millar, Dinah; W., Thuiller, Wilfried; A.J., Booth, Anthony John	Midgley, Guy F. (7006003164); Hannah, Lee (57203646144); Millar, Dinah (7102622591); Thuiller, Wilfried (6602123683); Booth, Anthony John (7201727987)	7006003164; 57203646144; 7102622591; 6602123683; 7201727987	Developing regional and species-level assessments of climate change impacts on biodiversity in the Cape Floristic Region	2003	Biological Conservation	112	2025-02-01		87	97	0	238	10.1016/S0006-3207(02)00414-7	https://www.scopus.com/inward/record.uri?eid=2-s2.0-0038062625&doi=10.1016%2FS0006-3207%2802%2900414-7&partnerID=40&md5=3bf9d7fd7b37dd2d3a52dfe868876fa4	South African National Biodiversity Institute, Pretoria, South Africa; Conservation International, Arlington, United States; Centre d’Ecologie Fonctionnelle et Evolutive, Montpellier, France; Rhodes University, Grahamstown, South Africa	Midgley, Guy F., Climate Change Research Group, South African National Biodiversity Institute, Pretoria, South Africa, Center for Applied Biodiversity Science, Conservation International, Arlington, United States; Hannah, Lee, Center for Applied Biodiversity Science, Conservation International, Arlington, United States; Millar, Dinah, Climate Change Research Group, South African National Biodiver…	We assess the potential impact of climate change on plant diversity in the Cape Floristic Region (CFR) and its interaction with land transformation that has already occurred in the region. Predictions were made both at the scale of the Fynbos Biome (the dominant vegetation assemblage in the CFR) and for selected Proteaceae species. Bioclimatic modelling identified parts of the biome at particular…	Bioclimatic Modelling; Climatic Niche; Corridor; Geographic Range Shift; Mediterranean-type Ecosystem; Winter Rainfall; Bioclimatology; Biodiversity; Climate Change; Conservation Planning; Ecological Impact; Land Use; Cape Floristic Region; South Africa; Proteaceae	bioclimatology; biodiversity; climate change; conservation planning; ecological impact; land use; Cape Floristic Region; South Africa; Proteaceae			Bakkenes, Michel, Assessing effects of forecasted climate change on the diversity and distribution of European higher plants for 2050, Global Change Biology, 8, 4, pp. 390-407, (2002); Broecker, Wallace S., What if the conveyor were to shut down? Reflections on a possible outcome of the great global experiment, GSA Today, 9, 1, pp. 1-7, (1999); Busby, John R., BIOCLIM - a bioclimate analysis and …		Elsevier BV						63207	0521397863; 9780521397865	BICOB		English	Article	Final		Scopus	2-s2.0-0038062625
M.C., Rutherford, Michael Charles; L.W., Powrie, Leslie Ward; R.E., Schulze, Roland E.	Rutherford, Michael Charles (7101874897); Powrie, Leslie Ward (6602739628); Schulze, Roland E. (7101986822)	7101874897; 6602739628; 7101986822	Climate change in conservation areas of South Africa and its potential impact on floristic composition: A first assessment	1999	Diversity and Distributions	5	6		253	262	0	58	10.1046/j.1472-4642.1999.00061.x	https://www.scopus.com/inward/record.uri?eid=2-s2.0-0033364412&doi=10.1046%2Fj.1472-4642.1999.00061.x&partnerID=40&md5=503eb8ec18e2e97adac506b0717c94de	South African National Biodiversity Institute, Pretoria, South Africa; University of KwaZulu-Natal, Durban, South Africa	Rutherford, Michael Charles, National Botanical Institute, South African National Biodiversity Institute, Pretoria, South Africa; Powrie, Leslie Ward, National Botanical Institute, South African National Biodiversity Institute, Pretoria, South Africa; Schulze, Roland E., University of Natal, University of KwaZulu-Natal, Durban, South Africa	Projected climate change has been suspected of affecting the biota of conserved nature areas in different and significant ways. Nevertheless, strategic management within some nature conservation agencies appears relatively unprepared for the possible consequences of climate change. National level planning of reserve design networks has also tended to skirt the issue, possibly owing to insufficien…	Bioclimatic; Extinction; Immigration; National Parks; Protected Area Network; Response Surfaces; Climate Change; Community Composition; Nature Reserve; Species Diversity; South Africa	climate change; community composition; nature reserve; species diversity; South Africa			Plants of Southern Africa Names and Distribution, (1993); Bartlein, Patrick J., Future climate in the Yellowstone National Park region and its potential impact on vegetation, Conservation Biology, 11, 3, pp. 782-792, (1997); Bezuidenhout, Hugo, An ecological study of the major vegetation communities of the Vaalbos National Park, northern Cape. 1. The Than-Droogeveld section, Koedoe, 37, 2, pp. 19…								14724642; 13669516		DIDIF		English	Article	Final	All Open Access; Hybrid Gold Open Access	Scopus	2-s2.0-0033364412
S.A., Morain, Stanley A.; P.R.H., Neville, Paul R.H.; T.K., Budge, Thomas K.; S.C., Morrison, Susan C.; D.A., Helfrich, Donald A.	Morain, Stanley A. (6603594937); Neville, Paul R.H. (7005136233); Budge, Thomas K. (6602972962); Morrison, Susan C. (56257219600); Helfrich, Donald A. (6603211132)	6603594937; 7005136233; 6602972962; 56257219600; 6603211132	Four-dimensional terrain model for tracking floristic changes induced by climate warming	1993	Proceedings of SPIE - The International Society for Optical Engineering	1943			334	347	0	1	10.1117/12.157162	https://www.scopus.com/inward/record.uri?eid=2-s2.0-85075936637&doi=10.1117%2F12.157162&partnerID=40&md5=6bc0cdc9adae358be5c3d594bae98d46	The University of New Mexico, Albuquerque, United States	Morain, Stanley A., Department of Geography, The University of New Mexico, Albuquerque, United States; Neville, Paul R.H., Department of Geography, The University of New Mexico, Albuquerque, United States; Budge, Thomas K., Department of Geography, The University of New Mexico, Albuquerque, United States; Morrison, Susan C., Department of Geography, The University of New Mexico, Albuquerque, Unit…	Elevational and latitudinal shifts will occur in the flora and vegetation of the Rocky Mountains due to climate warming. If we are to specify which species are successfully migrating in tune with these changes, and which are being adversely impacted, a 4- dimensional image-based GIS will be required to visualize and animate new ecological regimes imposed by changing temperature and precipitation …	Ecology; Geometry; Landforms; Mapping; Changing Temperature; Community Composition; Ecological Regimes; Management Decisions; Management Scenarios; Precipitation Patterns; Slope And Aspects; Species Composition; Climate Models	Ecology; Geometry; Landforms; Mapping; Changing temperature; Community composition; Ecological regimes; Management decisions; Management scenarios; Precipitation patterns; Slope and aspects; Species composition; Climate models			Canadian Journal of Botany, (1990); Allen, Robert B., Gradient analysis of latitudinal variation in southern Rocky Mountain forests, Journal of Biogeography, 18, 2, pp. 123-139, (1991); Bioscience, (1990); Daubenmire, Rexford F., Vegetational zonation in the Rocky Mountains, Botanical Review, 9, 6, pp. 325-393, (1943); Flora of Idaho, (1952); Frank, Thomas D., Mapping dominant vegetation communit…	Clark, B.P.; Douglas, A.; Foley, B.L.; Huberty, B.; Whitmill, L.D.	SPIE spie@spie.org		State-of-the-Art Mapping 1993		Orlando; FL	154371	0277786X; 1996756X	9781510692657; 9781510690561; 9781510693302; 9781510692251; 9781510692275; 9781510693081; 9781510688728; 9781510688629; 9781510692671; 9781510693326	PSISD		English	Conference paper	Final		Scopus	2-s2.0-85075936637
M.E., Collinson, Margaret Elizabeth; K., Fowler, K.; M.C., Boulter, Michael Charles	Collinson, Margaret Elizabeth (7006784193); Fowler, K. (57220520566); Boulter, Michael Charles (6603780669)	7006784193; 57220520566; 6603780669	Floristic changes indicate a cooling climate in the Eocene of southern England	1981	Nature	291	5813		315	317	0	74	10.1038/291315a0	https://www.scopus.com/inward/record.uri?eid=2-s2.0-0019368213&doi=10.1038%2F291315a0&partnerID=40&md5=0b90989907ac96f3b72f0388021c2338	The Natural History Museum, London, London, United Kingdom; University of Portsmouth, Portsmouth, United Kingdom; University of East London, London, United Kingdom	Collinson, Margaret Elizabeth, Palaeontology Department, The Natural History Museum, London, London, United Kingdom; Fowler, K., Department of Biological Sciences, University of Portsmouth, Portsmouth, United Kingdom; Boulter, Michael Charles, Department of Biological Sciences, University of East London, London, United Kingdom	A major climatic cooling at the close of the Eocene (the ′terminal Eocene event′) is suggested by studies of leaf floras in North America1,2; and by oxygen isotope studies, of mollusc shells from the North Sea3 and of floras in North America1,2; and by oxygen isotope studies, of mollusc shells from the North Sea3 and of planktonic and benthic foraminifera from the North and South Pacific 4. Clima…					American Scientist, (1978); Wolfe, Jack A., Tertiary climates and floristic relationships at high latitudes in the northern hemisphere, Palaeogeography, Palaeoclimatology, Palaeoecology, 30, C, pp. 313-323, (1980); Buchardt, Bjørn, Oxygen isotope palaeotemperatures from the Tertiary period in the North Sea area [9], Nature, 275, 5676, pp. 121-123, (1978); A Rev Earth Planet Sci, (1977); Mem Soc G…								14764687; 00280836	9780203448410; 0203448413			English	Article	Final		Scopus	2-s2.0-0019368213
